# Supplementary material for: The efficacy and safety of prokinetics in critically ill adults receiving gastric feeding tubes: A systematic review and meta-analysis
Source: PubMed Central journal article supplement (PMC7799841; doi:10.1371/journal.pone.0245317), 2021-01-11
Supplement: pone.0245317.s018.pdf [file pone.0245317.s018.pdf]

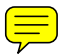

# PLOS ONE

## The efficacy and safety of prokinetics in critically ill adults receiving gastric feeding tubes: A systematic review and meta-analysis

--Manuscript Draft--

|                               |                                                                                                                                                                                                                                                                                                                                                                                                                                                                                                                                                                                                                                                                                                                                                                                                                                                                                                                                                                                                                                                                                                                                                                                                                                                                                                                                                                                                                                                                                                                                                                                                                                                                                                                                                                                                                                                                                                                                                                                                                                                                                                                                                                                   |
|-------------------------------|-----------------------------------------------------------------------------------------------------------------------------------------------------------------------------------------------------------------------------------------------------------------------------------------------------------------------------------------------------------------------------------------------------------------------------------------------------------------------------------------------------------------------------------------------------------------------------------------------------------------------------------------------------------------------------------------------------------------------------------------------------------------------------------------------------------------------------------------------------------------------------------------------------------------------------------------------------------------------------------------------------------------------------------------------------------------------------------------------------------------------------------------------------------------------------------------------------------------------------------------------------------------------------------------------------------------------------------------------------------------------------------------------------------------------------------------------------------------------------------------------------------------------------------------------------------------------------------------------------------------------------------------------------------------------------------------------------------------------------------------------------------------------------------------------------------------------------------------------------------------------------------------------------------------------------------------------------------------------------------------------------------------------------------------------------------------------------------------------------------------------------------------------------------------------------------|
| <b>Manuscript Number:</b>     | PONE-D-20-01167R2                                                                                                                                                                                                                                                                                                                                                                                                                                                                                                                                                                                                                                                                                                                                                                                                                                                                                                                                                                                                                                                                                                                                                                                                                                                                                                                                                                                                                                                                                                                                                                                                                                                                                                                                                                                                                                                                                                                                                                                                                                                                                                                                                                 |
| <b>Article Type:</b>          | Research Article                                                                                                                                                                                                                                                                                                                                                                                                                                                                                                                                                                                                                                                                                                                                                                                                                                                                                                                                                                                                                                                                                                                                                                                                                                                                                                                                                                                                                                                                                                                                                                                                                                                                                                                                                                                                                                                                                                                                                                                                                                                                                                                                                                  |
| <b>Full Title:</b>            | The efficacy and safety of prokinetics in critically ill adults receiving gastric feeding tubes: A systematic review and meta-analysis                                                                                                                                                                                                                                                                                                                                                                                                                                                                                                                                                                                                                                                                                                                                                                                                                                                                                                                                                                                                                                                                                                                                                                                                                                                                                                                                                                                                                                                                                                                                                                                                                                                                                                                                                                                                                                                                                                                                                                                                                                            |
| <b>Short Title:</b>           | Prokinetics for critically ill adults receiving gastric feeding tubes                                                                                                                                                                                                                                                                                                                                                                                                                                                                                                                                                                                                                                                                                                                                                                                                                                                                                                                                                                                                                                                                                                                                                                                                                                                                                                                                                                                                                                                                                                                                                                                                                                                                                                                                                                                                                                                                                                                                                                                                                                                                                                             |
| <b>Corresponding Author:</b>  | Lingli Zhang<br>Sichuan University<br>chengdu, Sichuan CHINA                                                                                                                                                                                                                                                                                                                                                                                                                                                                                                                                                                                                                                                                                                                                                                                                                                                                                                                                                                                                                                                                                                                                                                                                                                                                                                                                                                                                                                                                                                                                                                                                                                                                                                                                                                                                                                                                                                                                                                                                                                                                                                                      |
| <b>Keywords:</b>              | Prokinetics; critical illness; Gastroparesis; enteral nutrition; systematic review                                                                                                                                                                                                                                                                                                                                                                                                                                                                                                                                                                                                                                                                                                                                                                                                                                                                                                                                                                                                                                                                                                                                                                                                                                                                                                                                                                                                                                                                                                                                                                                                                                                                                                                                                                                                                                                                                                                                                                                                                                                                                                |
| <b>Abstract:</b>              | <p><b>Background:</b> Intolerance to gastric feeding tubes is common among critically ill adults and may increase morbidity. Administration of prokinetics in the ICU is common. However, the efficacy and safety of prokinetics are unclear in critically ill adults with gastric feeding tubes. We conducted a systematic review to determine the efficacy and safety of prokinetics for improving gastric feeding tube tolerance in critically ill adults.</p> <p><b>Methods:</b> Randomized controlled trials (RCTs) were identified by systematically searching the Medline, Cochrane and Embase databases. Two independent reviewers extracted relevant data and assessed the quality of the studies. We calculated pooled relative risks (RRs) for dichotomous outcomes and the mean differences (MDs) for continuous outcomes with the corresponding 95% confidence intervals (CIs). We assessed the risk of bias using the Cochrane risk-of-bias tool and used the Grading of Recommendations Assessment, Development, and Evaluation (GRADE) methodology to rate the quality of the evidence.</p> <p><b>Results:</b> Fifteen RCTs met the inclusion criteria. A total of 10 RCTs involving 846 participants were eligible for the quantitative analysis. Most studies (10 of 13, 76.92%) found that prokinetics showed beneficial effects on feeding intolerance in critically ill adults. In critically ill adults receiving gastric feeding, prokinetic agents may reduce the ICU length of stay (MD -2.03, 95% CI -3.96, -0.10; P = 0.04; low certainty) and the hospital length of stay (MD -3.21, 95%CI -5.35, -1.06; P = 0.003; low certainty). However, prokinetics failed to improve the outcomes of reported adverse events and all-cause mortality.</p> <p><b>Conclusion:</b> As a class of drugs, prokinetics may improve tolerance to gastric feeding to some extent in critically ill adults. However, the certainty of the evidence suggesting that prokinetics reduce the ICU or hospital length of stay is low. Prokinetics did not significantly decrease the risks of reported adverse events or all-cause mortality among critically ill adults.</p> |
| <b>Order of Authors:</b>      | Rong Peng<br>Hailong Li<br>Lijun Yang<br>Linan Zeng<br>Qiusha Yi<br>Peipei Xu<br>Xiangcheng Pan<br>Lingli Zhang                                                                                                                                                                                                                                                                                                                                                                                                                                                                                                                                                                                                                                                                                                                                                                                                                                                                                                                                                                                                                                                                                                                                                                                                                                                                                                                                                                                                                                                                                                                                                                                                                                                                                                                                                                                                                                                                                                                                                                                                                                                                   |
| <b>Response to Reviewers:</b> | Dear Editors and Reviewers,                                                                                                                                                                                                                                                                                                                                                                                                                                                                                                                                                                                                                                                                                                                                                                                                                                                                                                                                                                                                                                                                                                                                                                                                                                                                                                                                                                                                                                                                                                                                                                                                                                                                                                                                                                                                                                                                                                                                                                                                                                                                                                                                                       |

Thank you for your letter and the comments concerning our manuscript (Manuscript Number: PONE-D-20-01167R1). We appreciate your positive comments regarding our manuscript. Your suggestions and ideas have been carefully considered. Revised portions are marked with changes in colored fonts in the paper. We hope that the revised manuscript will meet with your approval. The main corrections in the paper and our responses to the reviewers' comments are as follows:

Editors' comments:

The review is greatly improved in clarity and transparency, but requires some minor changes. Please address the comments of the reviewers and in addition:

1. For Line 288-289 where you state that hospital LOS was not significant I suggest you revise to use the same language as in 292-3 for ICU LOS, in that there appears to be a positive effect, unless you wish to clarify in what way the hospital LOS was not significant (clinically?)

Answer: We sincerely appreciate your thoughtful advice. This mistake was due to our carelessness in writing, and all authors sincerely apologize for this mistake. We have corrected this error. In the revised paper, the text is as follows: "These five studies, which enrolled a total of 250 patients, demonstrated a significant difference in the hospital length of stay between the prokinetic agent-treated group and the control group (MD -3.21, 95% CI -5.35, -1.06; P = 0.003; I<sup>2</sup> = 28%) (Fig 2)."

2. For the outcomes of gastrointestinal symptoms and feeding tolerance, you should mention that if outcomes could not be combined by meta-analysis you summarized them narratively. You only discuss in the methods how you will use meta-analysis and then you do not meta-analyse the symptoms and tolerance outcomes, I assume because they are not appropriate to meta-analyze.

Answer: Yes. The various outcome definitions, especially for gastric tube tolerance, precluded quantitative synthesis of the data. According to your advice, we have amended this part in the revised manuscript as follows: "Thirteen studies evaluated the effect of prokinetics on gastrointestinal symptoms and/or feeding tolerance in adult critically ill patients receiving gastric feeding [26-30, 32-34, 36-40]. The main results obtained are as follows: gastric emptying, GRV, diarrhea, constipation, feeding complications and feeding intolerance. Gastric emptying was measured by the drug model of acetaminophen absorption or the <sup>13</sup>C-octanoic acid breath test with calculation of the gastric emptying time, gastric emptying coefficient or area under the plasma concentration-time curve. The various outcome definitions, especially for gastric tube tolerance, precluded quantitative synthesis of the data."

3. For Line 301 and the outcome of adverse events it is preferable to use the term 'risk' rather than 'incidence' as incidence implies measurement of time at risk.

Answer: Yes. Following your suggestion, to be more accurate, we have replaced "incidence" with "risk".

4. For Table 3 please include the units for each outcome, e.g., days and deaths

Answer: Thank you for this comment. We have revised the manuscript to include the unit for each outcome in Table 3. We hope that this change improves the readability of the data.

5. For all forest plots, including Fig 2, Fig 3, S2Fig and S3Fig, please specify the comparison and the outcome (with units) in the header and replace the bracketed experimental and control on the x axis with a legend indicating the comparisons.

Answer: Following your suggestion, we have added "units" and "legend" to each forest plot. These changes have been made to the text to improve the readability and to clarify the interpretation of the data.

Reviewers' comments:

Reviewer #1:

1. I thank the authors for the significant work done to address all comments and I find the reviewed submission substantially improved.

Answer: Thank you for your very considerate advice; your positive comment on our manuscript is sincerely appreciated. We will reply to your comments one by one in detail.

2.the length of stay unit for hospital and ICU is still not clear. I assume it is days. However would be nice to have it clarified. See my original comment #11.

Answer: We apologize for this mistake. The unit for the lengths of hospital stay and ICU stay is “days”. We have added “units” in Table 3 in the revised manuscript. We hope that these changes improve the readability and clarify the interpretation of the data.

3.line 377: "We recommend a more comprehensive search and further original studies on this topic." i recommend the words "more comprehensive search" be deleted as they give the impression the authors did not perform a comprehensive search.

Answer: Thank you for your thoughtful reminder. We agree with your advice; the words "more comprehensive search" have been deleted in the revised manuscript.

Reviewer #3:

Thank you for the opportunity to review the revised manuscript. In this systematic review, authors evaluated the effect of prokinetics in critically ill adults on gastric feeding tube tolerance according to the updated definition. This systematic review implies that prokinetics improves tolerance of enteral feeding, and additionally provides the attractive hypothesis that prokinetics may shorten the length of ICU and hospital stay. Although authors tried to perform meta-analysis about gastric feeding tube tolerance, study diversity (e.g. various interventions and various outcome definitions) did not allow the authors data synthesis. Authors seems to revise their manuscript well according to the previous editor's and reviewers' comments.

Comments to the authors:

1.As authors state in background, the aim of this study is to evaluate the effect of prokinetics on gastric feeding tube tolerance. So, the main results of this study is the description about this effect (L273-283), not about ICU and hospital length of stay. And one of key points of this study, I believe, is the difficulty to compare results across previous studies because of various outcome definitions, and necessity of the valid measure of gastric tube tolerance in future studies. Authors should add more concise description in this paragraph (L273-283) to show the potential benefit on gastric feeding tube tolerance and clarify the abovementioned point.

Answer: Thank you for your thoughtful reminder. These comments are valuable and very helpful for revising and improving our paper and provided important guiding significance for our research. According to your advice, we have amended this part in the revised manuscript as follows:

“Thirteen studies evaluated the effect of prokinetics on gastrointestinal symptoms and/or feeding tolerance in adult critically ill patients receiving gastric feeding [26-30, 32-34, 36-40]. The main results obtained are as follows: gastric emptying, GRV, diarrhea, constipation, feeding complications and feeding intolerance. Gastric emptying was measured by the drug model of acetaminophen absorption or the 13C-octanoic acid breath test with calculation of the gastric emptying time, gastric emptying coefficient or area under the plasma concentration-time curve. The various outcome definitions, especially for gastric tube tolerance, precluded quantitative synthesis of the data.

As a class of drugs, prokinetic agents appear to have positive effects on gastrointestinal function and improving feeding tolerance. Ten of the thirteen studies reported positive effects on improving gastric emptying and/or resolution of feeding intolerance in critically ill patients with the use of prokinetic agents. However, two studies suggested that metoclopramide had no effect on decreasing gastrointestinal complications in adult neurocritical patients or critical traumatic brain injury patients. One study reported that rikkunshito did not improve the achievement of enteral calorie targets in critically ill adults (Table 2).”

2.L288-290: "Those five studies, enrolling a total of 250 patients, demonstrated that there was no significant difference in hospital length of stay ..."

Are there any significant difference between groups about the hospital length of stay? 95%CI of -5.35 to -1.06 is significant, isn't it? Please check.

Answer: I apologize for this mistake. We have corrected this error. In the revised manuscript, the text is as follows: "These five studies, which enrolled a total of 250 patients, demonstrated a significant difference in the hospital length of stay between the prokinetic agent-treated group and the control group (MD -3.21, 95% CI -5.35, -

|                                                                                                                                                                                                                                                                                                                                                                                                                                                                                                                                                                                                                                                                                                                                                                                                                                                                                                                                                                                                                                                                                                                                                                                                                                                                                                                                                                                     |                                                                                                                                                                                                                                                                                                                                                                                                                                                                                                                                                                                                                                                                                                                                                                                                                                                                                                                                                  |
|-------------------------------------------------------------------------------------------------------------------------------------------------------------------------------------------------------------------------------------------------------------------------------------------------------------------------------------------------------------------------------------------------------------------------------------------------------------------------------------------------------------------------------------------------------------------------------------------------------------------------------------------------------------------------------------------------------------------------------------------------------------------------------------------------------------------------------------------------------------------------------------------------------------------------------------------------------------------------------------------------------------------------------------------------------------------------------------------------------------------------------------------------------------------------------------------------------------------------------------------------------------------------------------------------------------------------------------------------------------------------------------|--------------------------------------------------------------------------------------------------------------------------------------------------------------------------------------------------------------------------------------------------------------------------------------------------------------------------------------------------------------------------------------------------------------------------------------------------------------------------------------------------------------------------------------------------------------------------------------------------------------------------------------------------------------------------------------------------------------------------------------------------------------------------------------------------------------------------------------------------------------------------------------------------------------------------------------------------|
|                                                                                                                                                                                                                                                                                                                                                                                                                                                                                                                                                                                                                                                                                                                                                                                                                                                                                                                                                                                                                                                                                                                                                                                                                                                                                                                                                                                     | <p>1.06; P = 0.003; I2 = 28%) (Fig 2)".</p> <p>Thank you again for your attention and thoughtful advice. We hope that the revised manuscript will meet with your approval.</p>                                                                                                                                                                                                                                                                                                                                                                                                                                                                                                                                                                                                                                                                                                                                                                   |
| <b>Additional Information:</b>                                                                                                                                                                                                                                                                                                                                                                                                                                                                                                                                                                                                                                                                                                                                                                                                                                                                                                                                                                                                                                                                                                                                                                                                                                                                                                                                                      |                                                                                                                                                                                                                                                                                                                                                                                                                                                                                                                                                                                                                                                                                                                                                                                                                                                                                                                                                  |
| <b>Question</b>                                                                                                                                                                                                                                                                                                                                                                                                                                                                                                                                                                                                                                                                                                                                                                                                                                                                                                                                                                                                                                                                                                                                                                                                                                                                                                                                                                     | <b>Response</b>                                                                                                                                                                                                                                                                                                                                                                                                                                                                                                                                                                                                                                                                                                                                                                                                                                                                                                                                  |
| <p><b>Financial Disclosure</b></p> <p>Enter a financial disclosure statement that describes the sources of funding for the work included in this submission. Review the <a href="#">submission guidelines</a> for detailed requirements. View published research articles from <a href="#">PLOS ONE</a> for specific examples.</p> <p>This statement is required for submission and <b>will appear in the published article</b> if the submission is accepted. Please make sure it is accurate.</p> <p><b>Unfunded studies</b><br/>Enter: <i>The author(s) received no specific funding for this work.</i></p> <p><b>Funded studies</b><br/>Enter a statement with the following details:</p> <ul style="list-style-type: none"> <li>• Initials of the authors who received each award</li> <li>• Grant numbers awarded to each author</li> <li>• The full name of each funder</li> <li>• URL of each funder website</li> <li>• Did the sponsors or funders play any role in the study design, data collection and analysis, decision to publish, or preparation of the manuscript?</li> <li>• <b>NO</b> - Include this sentence at the end of your statement: <i>The funders had no role in study design, data collection and analysis, decision to publish, or preparation of the manuscript.</i></li> <li>• <b>YES</b> - Specify the role(s) played.</li> </ul> <p>* typeset</p> | <p>The study was supported by National Major Science and Technology Projects of China (Award Number: 2017ZX09304029, Recipient: Lingli Zhang), Sichuan Province Science and Technology Major Project (Award Number: 2017JY0067, Recipient: Lingli Zhang), the Major Project of Sichuan health committee (Award Number: 18ZD042, Recipient: Lingli Zhang), the Major Project of Sichuan Province Science and Technology in field of social development (Award Number: 20ZDYF3101, Recipient: Lingli Zhang), Applied Basic Research Program of Science and Technology Department of Sichuan province (Award Number: 20YYJC0072, Recipient: Rong Peng), the Project of Education Department of Sichuan Province (Award Number: 18ZB0146, Recipient: Rong Peng). The funders had no role in study design, data collection and analysis, decision to publish, or preparation of the manuscript. We declare that we have no conflicts of interest.</p> |
| <b>Competing Interests</b>                                                                                                                                                                                                                                                                                                                                                                                                                                                                                                                                                                                                                                                                                                                                                                                                                                                                                                                                                                                                                                                                                                                                                                                                                                                                                                                                                          | The authors have declared that no competing interests exist.                                                                                                                                                                                                                                                                                                                                                                                                                                                                                                                                                                                                                                                                                                                                                                                                                                                                                     |
| <p>Use the instructions below to enter a competing interest statement for this submission. On behalf of all authors, disclose any <a href="#">competing interests</a> that could be perceived to bias this work—acknowledging all financial support</p>                                                                                                                                                                                                                                                                                                                                                                                                                                                                                                                                                                                                                                                                                                                                                                                                                                                                                                                                                                                                                                                                                                                             |                                                                                                                                                                                                                                                                                                                                                                                                                                                                                                                                                                                                                                                                                                                                                                                                                                                                                                                                                  |

and any other relevant financial or non-financial competing interests.

This statement **will appear in the published article** if the submission is accepted. Please make sure it is accurate. View published research articles from [PLOS ONE](#) for specific examples.

**NO authors have competing interests**

Enter: *The authors have declared that no competing interests exist.*

**Authors with competing interests**

Enter competing interest details beginning with this statement:

*I have read the journal's policy and the authors of this manuscript have the following competing interests: [insert competing interests here]*

\* typeset

**Ethics Statement**

Enter an ethics statement for this submission. This statement is required if the study involved:

- Human participants
- Human specimens or tissue
- Vertebrate animals or cephalopods
- Vertebrate embryos or tissues
- Field research

Write "N/A" if the submission does not require an ethics statement.

General guidance is provided below. Consult the [submission guidelines](#) for detailed instructions. **Make sure that all information entered here is included in the Methods section of the manuscript.**

N/A

**Format for specific study types**

**Human Subject Research (involving human participants and/or tissue)**

- Give the name of the institutional review board or ethics committee that approved the study
- Include the approval number and/or a statement indicating approval of this research
- Indicate the form of consent obtained (written/oral) or the reason that consent was not obtained (e.g. the data were analyzed anonymously)

**Animal Research (involving vertebrate animals, embryos or tissues)**

- Provide the name of the Institutional Animal Care and Use Committee (IACUC) or other relevant ethics board that reviewed the study protocol, and indicate whether they approved this research or granted a formal waiver of ethical approval
- Include an approval number if one was obtained
- If the study involved *non-human primates*, add *additional details* about animal welfare and steps taken to ameliorate suffering
- If anesthesia, euthanasia, or any kind of animal sacrifice is part of the study, include briefly which substances and/or methods were applied

**Field Research**

Include the following details if this study involves the collection of plant, animal, or other materials from a natural setting:

- Field permit number
- Name of the institution or relevant body that granted permission

**Data Availability**

Authors are required to make all data underlying the findings described fully available, without restriction, and from the time of publication. PLOS allows rare exceptions to address legal and ethical concerns. See the [PLOS Data Policy](#) and [FAQ](#) for detailed information.

Yes - all data are fully available without restriction

A Data Availability Statement describing where the data can be found is required at submission. Your answers to this question constitute the Data Availability Statement and **will be published in the article**, if accepted.

**Important:** Stating 'data available on request from the author' is not sufficient. If your data are only available upon request, select 'No' for the first question and explain your exceptional situation in the text box.

Do the authors confirm that all data underlying the findings described in their manuscript are fully available without restriction?

**Describe where the data may be found in full sentences. If you are copying our sample text, replace any instances of XXX with the appropriate details.**

- If the data are **held or will be held in a public repository**, include URLs, accession numbers or DOIs. If this information will only be available after acceptance, indicate this by ticking the box below. For example: *All XXX files are available from the XXX database (accession number(s) XXX, XXX).*
- If the data are all contained **within the manuscript and/or Supporting Information files**, enter the following: *All relevant data are within the manuscript and its Supporting Information files.*
- If neither of these applies but you are able to provide **details of access elsewhere**, with or without limitations, please do so. For example:

*Data cannot be shared publicly because of [XXX]. Data are available from the XXX Institutional Data Access / Ethics Committee (contact via XXX) for researchers who meet the criteria for access to confidential data.*

*The data underlying the results presented in the study are available from (include the name of the third party*

All data generated or analysed during this study are included in this published article.

|                                                                                                                                                                                                                                         |  |
|-----------------------------------------------------------------------------------------------------------------------------------------------------------------------------------------------------------------------------------------|--|
| <p><i>and contact information or URL).</i></p> <ul style="list-style-type: none"><li>• This text is appropriate if the data are owned by a third party and authors do not have permission to share the data.</li></ul> <p>* typeset</p> |  |
| Additional data availability information:                                                                                                                                                                                               |  |



***The efficacy and safety of prokinetics in critically ill adults  
receiving gastric feeding tubes: A systematic review and  
meta-analysis***

Rong Peng<sup>1,2,3,4</sup>, Hailong Li<sup>1,2,3</sup>, Lijun Yang<sup>5</sup>, Linan Zeng<sup>1,2,3</sup>, Qiusha Yi<sup>1,2,3</sup>, Peipei Xu<sup>1,2,3</sup>,  
Xiangcheng Pan<sup>1,2,3</sup>, Lingli Zhang<sup>1,2,3\*</sup>

<sup>1</sup> Department of Pharmacy, West China Second University Hospital, Sichuan University, Chengdu, Sichuan, China

<sup>2</sup> Evidence-Based Pharmacy Center, West China Second University Hospital, Sichuan University, Chengdu, Sichuan, China

<sup>3</sup> Key Laboratory of Birth Defects and Related Diseases of Women and Children (Sichuan University), Ministry of Education, Chengdu, Sichuan, China

<sup>4</sup> Department of Clinical Nutrition, Affiliated Hospital of Chengdu University, Chengdu, Sichuan, China

<sup>5</sup> Department of General Practice Medicine, Affiliated Hospital of Chengdu University, Chengdu, Sichuan, China

\*Corresponding Author: Lingli Zhang, Department of Pharmacy, West China Second University Hospital, Sichuan University. Renming Road, Chengdu, Sichuan, 610041, China. Tel: 0862885502378

E-mail: [zhanglingli@scu.edu.cn](mailto:zhanglingli@scu.edu.cn)

# 1 Abstract

2 **Background:** Intolerance to gastric feeding tubes is common among critically ill adults and may  
3 increase morbidity. Administration of prokinetics in the ICU is common. However, the efficacy and  
4 safety of prokinetics are unclear in critically ill adults with gastric feeding tubes. We conducted a  
5 systematic review to determine the efficacy and safety of prokinetics for improving gastric feeding  
6 tube tolerance in critically ill adults.

7 **Methods:** Randomized controlled trials (RCTs) were identified by systematically searching the  
8 Medline, Cochrane and Embase databases. Two independent reviewers extracted relevant data and  
9 assessed the quality of the studies. We calculated pooled relative risks (RRs) for dichotomous  
10 outcomes and the mean differences (MDs) for continuous outcomes with the corresponding 95%  
11 confidence intervals (CIs). We assessed the risk of bias using the Cochrane risk-of-bias tool and used  
12 the Grading of Recommendations Assessment, Development, and Evaluation (GRADE) methodology  
13 to rate the quality of the evidence.

14 **Results:** Fifteen RCTs met the inclusion criteria. A total of 10 RCTs involving 846 participants were  
15 eligible for the quantitative analysis. Most studies (10 of 13, 76.92%) found that prokinetics showed  
16 beneficial effects on feeding intolerance in critically ill adults. **In critically ill adults receiving gastric**  
17 **feeding, prokinetic agents may reduce the ICU length of stay (MD -2.03, 95% CI -3.96, -0.10; P =**  
18 **0.04; low certainty)** and the **hospital length of stay (MD -3.21, 95% CI -5.35, -1.06; P = 0.003; low**  
19 **certainty)**. However, prokinetics **failed to improve the outcomes** of reported adverse events and all-  
20 cause mortality.

21 **Conclusion:** As a class of drugs, prokinetics may improve tolerance to gastric feeding to some extent  
22 in critically ill adults. However, the certainty of the evidence suggesting that prokinetics reduce the  
23 ICU or hospital length of stay is low. Prokinetics did not significantly decrease the risks of reported  
24 adverse events or all-cause mortality among critically ill adults.

25 **Keywords:** Prokinetics; Critical illness; Gastroparesis; Enteral nutrition; Systematic review.

## 26 **Introduction**

27 Critical illness is usually associated with catabolic stress and increases the incidence of infection and  
28 multiple organ dysfunction, bringing disproportionately high mortality. A systematic review found a  
29 strikingly high prevalence of malnutrition in intensive care unit (ICU) patients (ranging from 38% to  
30 78%) [1]. Owing to the benefits of nutrition support in reducing disease severity and favorably  
31 impacting patient outcomes, early nutrition support therapy, primarily by the enteral route, is seen as a  
32 proactive therapeutic strategy [2]. In addition, if oral intake is not possible, tube feeding through  
33 gastric access has been recommended as the standard approach to initiate enteral nutrition in adult  
34 critically ill patients [3], as gastric feeding provides greater nutritional and non-nutritional benefits  
35 than parenteral nutrition and is more likely to improve the prognosis [4]. Furthermore, gastric feeding  
36 is more physiological than postpyloric feeding  does not require a higher level of technology [3].

37 However, enteral tube feeding intolerance occurs frequently in critically ill patients. Blaser et al.  
38 reported that the pooled proportion of feeding intolerance was 38.3% (95% confidence interval (CI)  
39 30.7–46.2%) [5]. Feeding intolerance was first described by the Working Group on Abdominal  
40 Problems of the European Society of Intensive Care Medicine as failure to provide adequate enteral  
41 nutrition to critically ill patients for clinical reasons (vomiting, high gastric residual volume (GRV),  
42 diarrhea, gastrointestinal bleeding, presence of entero-cutaneous fistulas, etc.); if a feeding rate of at  
43 least 20 kcal/kg body weight (BW)/day cannot be reached via the enteral route in 72 h of feeding  
44 attempts or if enteral feeding must be stopped for any clinical reason, feeding intolerance should be  
45 considered present [6]. However, feeding intolerance is inconsistently defined in different studies, with  
46 the definitions falling into three main categories: (1) “large” GRV; (2) presence of gastrointestinal  
47 symptoms; or 3) inadequate delivery of enteral nutrition [5]. Feeding intolerance is associated with  
48 increasing mortality, and seven-day feeding intolerance is an independent predictor of 60-day  
49 mortality [7]. In addition, a meta-analysis by the European Society for Clinical Nutrition and  
50 Metabolism showed that gastric feeding intolerance was more prevalent than postpyloric feeding

51 intolerance (25.7% vs. 3.5%,  $p=0.0005$ ) [3]. Given the risk associated with gastric feeding intolerance,  
52 it should be treated aggressively.

53 There are three methods for the treatment of gastric feeding intolerance. First, there is the most widely  
54 used method, the administration of prokinetics. Among recipients of gastric feeding, 13% had been  
55 prescribed prokinetics preemptively before they developed intolerance. Approximately one-third of  
56 patients who developed feeding intolerance were treated with a prokinetic agent during their stay in  
57 the ICU. Second, after the development of intolerance, 17% of patients received supplemental  
58 parenteral nutrition. Third, only 7.5% of patients with gastric feeding intolerance subsequently  
59 received enteral nutrition via a postpyloric feeding tube [8]. Although the use of prokinetics in the ICU  
60 is common, the recommendations vary from one authority to another. For example, the ESPEN  
61 guidelines on clinical nutrition in the ICU [3] suggest that intravenous erythromycin should be used as  
62 a first-line prokinetic therapy in critically ill patients with gastric feeding intolerance (grade of  
63 recommendation: B – strong consensus, 100% agreement). Alternatively, intravenous metoclopramide  
64 or a combination of metoclopramide and erythromycin can be used as a prokinetic therapy (Grade of  
65 recommendation: 0 – strong consensus, 100% agreement). However, the ASPEN/SCCM guidelines  
66 weakly recommend the use of gastrointestinal motility agents in the case of feeding intolerance (low  
67 quality of evidence) [2]. The Canadian Critical Care Clinical Practice guidelines recommend  
68 metoclopramide as the first-line prokinetic agent in the ICU [9]. However, in Chinese guidelines,  
69 herbal or natural medicines that enhance gastric motility are recommended for patients receiving  
70 gastric feeding tubes [10]. There is little agreement on how to use prokinetics for gastric feeding  
71 intolerance in critically ill patients. One of the reasons for the different recommendations may be that  
72 the definition of feeding intolerance has changed over time, especially regarding the index of high  
73 GRV. ~~Some studies have suggested that measurement of GRV provides no benefit and should no~~  
74 ~~longer be recommended. However, GRV is also an indicator of feeding intolerance in many ICUs,~~  
75 especially in patients with a high risk of aspiration and aspiration pneumonia. Therefore, the Chinese  
76 guidelines call for caution in abandoning monitoring of GRV in some high-risk patients [10]. If GRV

77 is measured, a volume of less than 500 mL should not result in an interruption of feeding unless there  
78 are other signs of intolerance, such as nausea, vomiting, abdominal pain, abdominal distension, or  
79 deterioration in hemodynamics or overall status [11]. A GRV of 500 mL is the recommended  
80 threshold for a diagnosis of enteral feeding intolerance in US and European critical care and nutrition  
81 society guidelines [2, 3, 12]. Although the updated European Society for Clinical Nutrition and  
82 Metabolism (ESPEN) guidelines [3], published in 2019, provide the latest information on enteral  
83 nutrition (EN) and parenteral nutrition (PN) in critically ill adult patients, we find that some aspects of  
84 the efficacy and safety of prokinetics in critically ill patients are still quite unclear [13], and it is  
85 necessary to find new evidence to address these uncertainties.

86 On this topic, a previous meta-analysis by Lewis, K. et al. [14] examined the effects of prokinetics on  
87 feeding intolerance or high GRV and clinical outcomes. However, Lewis, K. et al. [14] defined  
88 feeding intolerance as  $GRV \geq 150$  mL, vomiting, or abdominal distention resulting in feeding  
89 interruption. This definition may be considered obsolete [15]. Some new evidence has emerged on this  
90 topic; considering recent evidence, we conducted this systematic review to determine the efficacy and  
91 safety of prokinetics for intolerance of gastric feeding in critically ill adult patients.

## 92 **Methods**

93 This systematic review and meta-analysis was conducted according to the Cochrane Handbook for  
94 Systematic Reviews of Interventions (version 5.1.0) [16], and the reporting of our study was based on  
95 the Preferred Reporting Items for Systematic Reviews and Meta-analyses (PRISMA) statement [17].  
96 The review protocol is available on PROSPERO, registration number CRD42020157446.  
97 Neither patients who received gastric feeding in the ICU nor their families were involved in defining  
98 the research question or the outcome measures, but they were intimately involved in the design,  
99 giving our team a wealth of good advice regarding design ideas.

## 100 **Search strategy**

101 We searched the Medline and Embase databases as well as the Cochrane Central Register of  
102 Controlled Trials (CENTRAL) from their inception dates to November 22, 2019. We combined  
103 Medical Subject Headings (MeSH) and free text terms to identify relevant articles. An information  
104 expert (XY) developed our search strategies.

105 We also searched clinicaltrials.gov (<https://clinicaltrials.gov/>) and the WHO ICTRP  
106 (<http://apps.who.int/trialsearch/>) for additional information, using the terms “critically ill patients”, and  
107 limited our search to studies labeled “completed” AND “Interventional studies (clinical trials)” in  
108 which summary results were available to identify additional eligible studies. There were no language  
109 restrictions. Additionally, we used a manual search strategy to retrieve the relevant articles referred to  
110 by the retrieved publications (the search strategies are reported in **S1 Table**).

## 111 **Inclusion criteria**

112 Trials were selected based on the following inclusion criteria: (1) the study was designed as a  
113 randomized controlled trial (RCT) comparing prokinetic treatment with a control group; (2) the  
114 population included critically ill adult patients aged  $\geq 18$  years who were admitted to the ICU and  
115 received gastric feeding tubes regardless of whether they had pre-existing feeding intolerance; (3) the  
116 intervention group received metoclopramide, erythromycin, or other prokinetic agents, such as herbal  
117 medicine or natural medicines with the function of enhancing gastric motility, regardless of the dose,  
118 frequency, duration or combination of prokinetics; (4) the control group received no intervention or a  
119 placebo; (5) if the gastric feeding patients with feeding intolerance had a GRV  $\geq 500$  mL and/or  
120 symptoms of nausea, vomiting, abdominal distention, regurgitation, deterioration in hemodynamics or  
121 other symptoms resulting in feeding interruption and failed to respond to interventions, regardless of  
122 whether they were in the control group or the prokinetics group, they were switched to postpyloric  
123 feeding or had gastric feeding withheld for 4-6 h [2, 3]; and (6) the outcomes included any of the

124 following: all-cause mortality; Acute Physiology and Chronic Health Evaluation II (APACHE II) or  
125 Simplified Acute Physiology Score II; sepsis; use of an artificial airway; pneumonia; hospital or ICU  
126 length of stay; patient nutritional status (malnutrition); gastrointestinal symptoms; GRV; feeding  
127 intolerance; or side effects of the prokinetics, such as cardiovascular disorders, bronchospasm,  
128 extrapyramidal symptoms, abdominal cramps, allergic reactions and pancreas disorders. The exclusion  
129 criteria were as follows: (1) the studies had no control group; (2) the studies had no prokinetic  
130 treatment group; (3) patients were considered to have feeding intolerance if tube feeding was  
131 electively not prescribed or was stopped/interrupted for procedural reasons; (4) the studies  
132 discontinued or interrupted the gastric feeding prematurely when the GRV was less than 500 mL or the  
133 patients did not have any signs of intolerance, such as nausea, vomiting, abdominal pain, abdominal  
134 distension, or deterioration in hemodynamics or overall status.

135 For our purposes, gastric feeding intolerance was defined as a “large” GRV ( $\geq 500$  mL), the presence  
136 of gastrointestinal symptoms (vomiting, diarrhea, gastrointestinal bleeding, the presence of  
137 enterocutaneous fistulas), or inadequate delivery of EN (the energy provided by EN was less than 20  
138 kcal/kg BW/day after 72 h of feeding attempts or less than 60% of the EN target at the fifth day) in  
139 critically ill adults receiving gastric feeding tubes. Preventive usage of prokinetics meant that  
140 prokinetics were prescribed preemptively on the day EN was initiated and before patients presented a  
141 GRV  $>150$  mL or symptoms of feeding intolerance. Preventive usage of prokinetics for risk meant that  
142 prokinetics were used in patients with GRVs between 150 and 500 mL but before the development of  
143 intolerance. Therapeutic usage of prokinetics meant that the prokinetics were administered in patients  
144 who had developed feeding intolerance.

145 A reported adverse event was defined as any untoward medical occurrence or unfavorable and  
146 unintended sign, including an abnormal laboratory finding, symptom, or disease (new or exacerbated),  
147 temporally associated with the use of the study medication. The reported adverse events included  
148 abnormal laboratory test results (hematology, clinical chemistry, or urinalysis) or other safety  
149 assessments (e.g., ECGs, radiological scans, or measurements of vital signs), including those that

150 worsened from baseline and were deemed clinically significant in the medical and scientific judgment  
151 of the investigator; exacerbation of a chronic or intermittent preexisting condition, including an  
152 increase in the frequency and/or intensity of the condition; new conditions detected or diagnosed after  
153 the administration of study medication even if they may have been present prior to the start of the  
154 study; and/or signs, symptoms, or clinical sequelae of a suspected interaction, such as diarrhea,  
155 nosocomial pneumonia, severe sepsis, brain herniation, cardiac arrest, or changes in the  
156 electrocardiographic QTc interval.

## 157 **Risk-of-bias assessments**

158 The methodological quality for the included RCTs was assessed independently by 2 researchers (RP,  
159 HLL) based on the Cochrane risk-of-bias criteria [16]. The seven items used to evaluate bias in each  
160 trial included randomization sequence generation, allocation concealment, blinding of participants and  
161 personnel, blinding of outcome assessment, incomplete outcome data, selective reporting, and other  
162 bias. We defined other bias as being present in the trials where baseline characteristics were not  
163 similar between different intervention groups. The included trials were graded as low quality, high  
164 quality, or unclear risk based on the following criteria: (1) trials were considered low quality if either  
165 randomization or allocation concealment was assessed as having a high risk of bias, regardless of the  
166 risk of other items; (2) trials were considered high quality when both randomization and allocation  
167 concealment were assessed as having a low risk of bias and all other items were assessed as having a  
168 low or unclear risk of bias; (3) trials were considered to have unclear risk if they did not meet the  
169 criteria for high or low risk.

## 170 **Data extraction**

171 Two researchers (RP, HLL) independently extracted the following information from each eligible  
172 RCT: (1) general study characteristics: author name, year of publication, numbers of treatment groups  
173 and patients, trial registry number, methods for measuring gastric emptying or GRV, and the definition



174 of feeding intolerance; (2) patient characteristics: sex, age, baseline patient information (presence or  
175 absence of pre-existing feeding intolerance, APACHE II score and nutritional status, if reported); (3)  
176 primary diseases (the medical, surgical, or neurosurgical conditions of the critically ill patients); (4)  
177 interventions: details of the prokinetic treatment group and control group (e.g., dose, frequency,  
178 duration and combination of prokinetics for treatment); and (5) outcomes: gastrointestinal symptoms,  
179 feeding tolerance, the number of participants with all-cause death, the ICU length of stay, the hospital  
180 length of stay, and the number of reported adverse events.

181 If the trials had more than 2 groups or used factorial designs and could be analyzed using multiple  
182 comparisons, we extracted only the information and data of interest reported in the original articles. If  
183 a trial had multiple reports, we collated all data into one study. If a trial had both reports from  
184 ClinicalTrials.gov and journal publications, we carefully checked data from these two sources for  
185 consistency. If outcome data were reported at multiple follow-up points, we used data from the longest  
186 follow-up.

## 187 **Statistical analysis**

188 The effect of prokinetics on gastrointestinal symptoms and feeding tolerance, main clinical outcomes  
189 of all-cause mortality, ICU length of stay, hospital length of stay, and reported adverse events were  
190 analyzed. We recorded data on the number of participants with each outcome event by allocated group  
191 and recorded the number of participants with compliance and the participant, who was later thought to  
192 be eligible or otherwise excluded from treatment or follow-up. Intention-to-treat (ITT) analysis was  
193 conducted. ITT analysis is a comparison of the treatment groups that include all patients as originally  
194 allocated after randomization regardless of whether treatment was initiated or completed [18]. The  
195 CONSORT (Consolidated Standards of Reporting Trials) recommends ITT analysis as standard  
196 practice [19].

197 We performed a meta-analysis to calculate relative risks (RRs) or absolute risk differences (ARDs) in

198 dichotomous data and mean differences (MDs) in continuous data, 95% CIs using the Mantel-  
199 Haenszel method and the inverse variance statistical method, respectively. If sufficient data were not  
200 available in the published reports or the abstract of the conference, we contacted the authors of the  
201 paper. If the raw data were not the mean and standard deviation, the sample mean and standard  
202 deviation were estimated from the sample size, median, range and/or interquartile range [20, 21].

203 We tested for heterogeneity between trial results using a standard Chi<sup>2</sup> test, and statistical  
204 heterogeneity between summary data was evaluated using the I<sup>2</sup> statistic. Sensitivity analysis was  
205 performed by excluding low-quality studies, trials recruiting participants with particular conditions, or  
206 trials with characteristics different from the others. When an inconsistency was detected between the  
207 RR and ARD for the same outcome, we explained the results based on the RR because the RR model  
208 is more consistent than ARD, particularly for an intervention aimed at preventing an undesirable event  
209 [16, 22].

210 In our meta-analysis, a random-effects model was used. The defining feature of the random-effects  
211 model is that there is a distribution of true effect sizes, and there are two sources of variance, within-  
212 study error variance and between-study variance [23]. However, if the number of studies is very small,  
213 the statistical power will have poor precision due to the variance between studies. Although the  
214 random-effects model is still the appropriate model, the information to apply it correctly is not  
215 available. In this case, we will add the separate effects to our manuscript. If heterogeneity was  
216 identified (I<sup>2</sup> >40% [16]) and sufficient trials were included in the review, we planned to investigate  
217 heterogeneity in the specified subgroups based on types of prokinetics (erythromycin, metoclopramide  
218 or other prokinetics), combination of prokinetics (yes or no), and feeding intolerance history  
219 (participants with or without pre-existing feeding intolerance before the start of the trial). Analysis was  
220 performed to assess whether the difference between the subgroups was statistically significant.

221 We assessed publication bias by examining funnel plots when the number of trials reporting the  
222 primary outcomes was 10 or more. However, if the number of included studies is less than 10 for a

223 given main outcome, the funnel plot may not reliably detect evidence of departure bias. A prototypical  
224 situation that should elicit suspicion of publication bias is when evidence is derived from a small  
225 number of studies or small sample sizes and all outcomes favor the intervention [24]. All meta-  
226 analyses were performed using RevMan version 5.3 (Cochrane Collaboration). All tests were 2-tailed,  
227 and  $P < 0.05$  was considered statistically significant.

228 We used the Grading of Recommendations Assessment, Development, and Evaluation (GRADE)  
229 methodology to rate the certainty of evidence as high, moderate, low, or very low. RCTs begin as  
230 high-certainty evidence but can be downgraded because of risk of bias, imprecision, inconsistency,  
231 indirectness, or publication bias. If the limitation of the evidence was considered serious, the evidence  
232 was downgraded by one level; if the limitation was considered very serious, the evidence was  
233 downgraded by two levels [25].

## 234 **Results**

235 Our initial search identified a total of 595 citations. After deduplication, 459 publications remained.  
236 The titles and abstracts of those records were screened for inclusion, and 48 reports proved potentially  
237 eligible. After full-text screening, fifteen trials met the inclusion criteria [26-40]. Five studies did not  
238 provide useful data for quantitative synthesis (meta-analysis) [36-40]. Ultimately, 10 trials were  
239 included in the quantitative analysis [26-35]. A total of 846 patients were enrolled in 10 RCTs,  
240 including a variety of critically ill patients with medical, surgical, and neurosurgical conditions. The  
241 details of the eligible trials are presented in **Fig 1**. Studies were excluded if they had a different trial  
242 design [41-45], a different intervention or a different control [46-64], or a different population [65-67]  
243 or had been registered with the Clinical Trials Registry Platform (clinicaltrials.gov or WHO ICTRP)  
244 and had been labeled “completed” but outcomes were not reported [68-73] (**S2 Table**).

245 **Fig 1. Literature Search and Screening Process.**

246 The 15 eligible studies reported 10 prokinetics, including metoclopramide, erythromycin, cisapride,  
247 GSK962040, mosapride and herbal medicine or natural medicines with the function of enhancing  
248 gastric motility (Chenxia Sijunzi decoction, ginger, fenugreek seed powder, gastrolit (*Zataria*  
249 *multiflora*), rikkunshito), respectively. Based on the outcomes measured, the studies were subdivided  
250 into those investigating effects on gastrointestinal symptoms, feeding tolerance studies, and clinical  
251 outcome studies: hospital length of stay, ICU length of stay, reported adverse events, and all-cause  
252 mortality. The details of the eligible studies are presented in **Table 1**.

**Table 1. Characteristics of the included trials and participants**

| Included Trials                                    | Population                                                                                                                                                                   | Treatment #                                                                            | Main outcomes                                                                                                                             | Definition of feeding intolerance †     | Prokinetic initiation timing * |
|----------------------------------------------------|------------------------------------------------------------------------------------------------------------------------------------------------------------------------------|----------------------------------------------------------------------------------------|-------------------------------------------------------------------------------------------------------------------------------------------|-----------------------------------------|--------------------------------|
| Yavagal et al 2000 (India) [35]                    | ICU patients required placement of a nasogastric tube for >24 hrs. Mean age: 36.22 years, 61.97% male. Mean APACHE II score: 17.54.                                          | 1) Metoclopramide 10 mg NG q8h;<br>2) Placebo.                                         | 1) Nosocomial pneumonia;<br>2) Mortality.                                                                                                 | NA                                      | Preventive usage               |
| Sustic et al 2005 (Croatia) [39] ¶                 | Patients treated at a cardiosurgical ICU after CABG surgery, enteral feeding by nasogastric tube. Mean age: 59.5 years, 77.5% male. Mean SAPS II score: 21.                  | 1) Metoclopramide 10 mg i.v.;<br>2) Control group.                                     | 1) $t_{+15}$ , $t_{+30}$ , $t_{+60}$ , $t_{+120}$ ;<br>2) $AUC_{120}$ ;<br>3) $C_{max}$ .                                                 | NA                                      | Preventive usage               |
| Nursal et al 2007 (Turkey) [32]                    | Traumatic brain injury patients with Glasgow Coma Scale scores of 3–11. Enteral feeding by nasogastric tube. Mean age: 43.42 years, 84.2% male. Mean APACHE II score: 12.87. | 1) Metoclopramide 10 mg i.v. q8h×5 days;<br>2) Control group, saline                   | 1) Feeding intolerance;<br>2) Feeding complications;<br>3) $AUC_{60}$ ;<br>4) $C_{max}$ ;<br>5) Length of hospital stay;<br>6) Mortality. | Gastrointestinal symptoms (without GRV) | Preventive usage               |
| Nassaji et al 2010 (Islamic Republic of Iran) [31] | Surgical ICU with a nasogastric tube for more than 24 hours. Mean age: 44.88 years, 65.45% male. Mean APACHE II score: not reported.                                         | 1) Metoclopramide 10 mg NG q8h;<br>2) Control patients did not receive metoclopramide. | 1) Nosocomial pneumonia;<br>2) Mortality.                                                                                                 | NA                                      | Preventive usage               |

|                                          |                                                                                                                                                                                                                                 |                                                                                        |                                                                                                                                                                                                                                      |                                                        |                   |
|------------------------------------------|---------------------------------------------------------------------------------------------------------------------------------------------------------------------------------------------------------------------------------|----------------------------------------------------------------------------------------|--------------------------------------------------------------------------------------------------------------------------------------------------------------------------------------------------------------------------------------|--------------------------------------------------------|-------------------|
| Acosta-Escribano et al 2014 (Spain) [26] | Adult neuro-critical patients, Glasgow Coma Scores of 14 to 9 points, with ventilation indications at admission and the need for artificial enteral nutrition. Mean age: 54.53 years, 65.14% male. Mean APACHE II score: 18.53. | 1) Metoclopramide 10 mg;<br>2) Placebo.                                                | 1) Gastrointestinal complications;<br>2) Gastric residue;<br>3) Mechanical ventilation-associated pneumonia;<br>4) The duration of mechanical ventilation;<br>5) Length of ICU stay;<br>6) Length of hospital stay;<br>7) Mortality. | Large GRV alone (>500 mL in two consecutive episodes)  | Preventive usage  |
| Rajan et al 2017 (India) [38] ¶          | Critically ill cirrhotic patients in a liver ICU with feeding intolerance.                                                                                                                                                      | 1) Metoclopramide i.v.,<br>2) Erythromycin i.v.,<br>3) Placebo.                        | 1) Mortality;<br>2) GRV.                                                                                                                                                                                                             | Gastrointestinal symptoms including large GRV (500 mL) | Therapeutic usage |
| Ritz et al 2005 (Australia) [33]         | Mixed medical/surgical intensive care unit patients with mechanic ventilation. Mean age: 47.49 years, 60.9% male. Mean APACHE II score: 19.                                                                                     | 1) <b>Erythromycin 70 mg;</b><br>2) Erythromycin 200 mg;<br>3) Placebo, saline (0.9%). | 1) Gastric emptying coefficient;<br>2) Gastric half-emptying time ( $t_{1/2}$ ).                                                                                                                                                     | NA                                                     | Preventive usage  |
| Spapen et al 1995 (Belgium) [34]         | Adult medical/surgical intensive care unit patients requiring prolonged mechanical ventilation and enteral feeding. Mean age: 71.10 years, 52.38% male. Mean APACHE II score: not reported.                                     | 1) Cisapride 10 mg q6h;<br>2) No treatment.                                            | 1) Gastric residue;<br>2) The mean time at which 50% of the technetium 99m-labeled test meal was eliminated from the stomach ( $T_{1/2}$ );<br>3) Mortality.                                                                         | NA                                                     | Preventive usage  |

|                                                             |                                                                                                                                                           |                                                                                                                                                                                                                                                                                      |                                                                                                                                                                                                       |                                                                                              |                           |
|-------------------------------------------------------------|-----------------------------------------------------------------------------------------------------------------------------------------------------------|--------------------------------------------------------------------------------------------------------------------------------------------------------------------------------------------------------------------------------------------------------------------------------------|-------------------------------------------------------------------------------------------------------------------------------------------------------------------------------------------------------|----------------------------------------------------------------------------------------------|---------------------------|
| Heyland et al<br>1996 (Canada)<br>[36] ¶                    | Mechanically ventilated patients in trauma and neurosurgery ICUs. Mean age: 53.9 years, 61% male. Mean SAPS score: 9.5.                                   | 1) Cisapride 20 mg, NG;<br>2) An identical placebo.                                                                                                                                                                                                                                  | 1) C <sub>max</sub> ;<br>2) AUC <sub>180</sub> .                                                                                                                                                      | NA                                                                                           | Preventive usage          |
| Chapman et al,<br>2016 (Australia)<br>[27]                  | Patients undergoing invasive mechanical ventilation in the ICU with nasogastric feeding. Mean age: 44.67 years, 83.33% male. Mean APACHE II score: 18.14. | 1) <b>GSK962040 (50 mg);</b><br>2) GSK962040 (75 mg);<br>3) Placebo.                                                                                                                                                                                                                 | 1) Breath test gastric time to half emptying (BTt <sub>1/2</sub> );<br>2) Gastric emptying coefficient;<br>3) AUC <sub>240</sub> , AUC <sub>60</sub> ;<br>4) C <sub>max</sub> ;<br>5) Adverse events. | Large GRV alone (>200 mL) at least 6 hours after commencing liquid nutrition at ≥ 40 kcal/hr | Preventive usage for risk |
| Mokhtari et al<br>2009 (Islamic Republic of Iran)<br>[37] ¶ | Adult respiratory distress syndrome (ARDS) ICU patients.                                                                                                  | 1) Ginger,<br>2) Placebo.                                                                                                                                                                                                                                                            | 1) Feeding tolerated;<br>2) Ventilator-associated pneumonia;<br>3) ICU-free days;<br>4) Ventilator-free days;<br>5) Morality.                                                                         | Delayed gastric emptying is one of the major reasons for enteral feeding intolerance         | Preventive usage          |
| Guo JH, et al<br>2012 (China) [29]                          | Feeding with enteral nutrition in critically ill patients. Mean age: 59.49 years, 53.33% male. Mean APACHE II score: not reported.                        | 1) <b>Traditional Chinese medicine group: Chenxia Sijunzi decoction;</b><br>2) Western medicine group: mosapride dispersible tablets 5 mg and multienzyme tablets NG;<br>3) Control group: routine symptomatic treatment without any medicines to promote gastrointestinal function. | 1) The time of bowel sound recovery;<br>2) Gas passage time by anus;<br>3) The bowel movement time;<br>4) Days in the hospital.                                                                       | NA                                                                                           | Preventive usage          |

|                                         |                                                                                                                                                                                                                                     |                                                                                                              |                                                                                                                                                                                                                                  |                                                                                                   |                  |
|-----------------------------------------|-------------------------------------------------------------------------------------------------------------------------------------------------------------------------------------------------------------------------------------|--------------------------------------------------------------------------------------------------------------|----------------------------------------------------------------------------------------------------------------------------------------------------------------------------------------------------------------------------------|---------------------------------------------------------------------------------------------------|------------------|
| Kooshki et al<br>2018 (Iran) [30]       | Mechanically ventilated patients, enteral nutrition with nasogastric tube in two intensive care unit centers. Mean age: 56.95 years, 51.67% male. Mean APACHE II score: 23.2.                                                       | 1) Fenugreek seed powder 3 g q12h NG;<br>2) Routine care.                                                    | 1) Diarrhea;<br>2) Constipation;<br>3) GRV;<br>4) Respiratory aspiration;<br>5) Duration of mechanical ventilation;<br>6) Length of stay in the hospital;<br>7) Length of stay in the ICU;<br>8) Mortality.                      | Gastrointestinal symptoms                                                                         | Preventive usage |
| Tahershamsi et al<br>2018 (Iran) [40] ¶ | Mechanically ventilated patients hospitalized in ICU. Mean age: 63.06 years, 60.0% male. Mean APACHE II score: No report.                                                                                                           | 1) Gastrolit ( <i>Zataria multiflora</i> ) (20 drops) q8h× 4 days;<br>2) Placebo = water.                    | 1) GRV.                                                                                                                                                                                                                          | NA                                                                                                | Preventive usage |
| Doi et al 2019<br>(Japan) [28]          | Critically ill adult patients requiring enteral nutrition by gastric tube for at least 5 days, and all patients were treated with invasive mechanical ventilation. Mean age: 72.84 years, 77.78% male. Mean APACHE II score: 22.82. | 1) <b>Rikkunshito 5 g</b> q8h × 5 days;<br>2) Rikkunshito 2.5 g q8h× 5 days;<br>3) No rikkunshito (control). | 1) GRV;<br>2) The percentage of the target enteral calorie intake achieved at the fifth day;<br>3) The plasma levels of ghrelin;<br>4) ICU length of stay;<br>5) Hospital length of stay;<br>6) Adverse events;<br>7) Mortality. | Inadequate enteral nutrition/failure to meet the enteral nutrition target at the fifth day (<60%) | Preventive usage |

254 NG: nasogastric tube feeding; i.v.: intravenous injection; NA: not applicable; C<sub>max</sub>: peak paracetamol plasma levels; AUC: the area under the paracetamol concentration curve; t<sub>+15</sub>, t<sub>+30</sub>, t<sub>+60</sub>, t<sub>+120</sub>:  
255 plasma paracetamol concentrations at 15, 30, 60, and 120 minutes after administration of paracetamol and saline or metoclopramide in patients; SAPS, simplified acute physiology score; GRV,  
256 gastric residual volume.



257 # If the trials had more than 2 groups or factorial designs and permitted multiple comparisons, the subgroup in bold font was extracted in this study.

258 ¶ The study did not provide useful data for meta-analysis.

## 259 **Risk of bias**

260 There was one trial at low risk of bias [27], and two studies were at high risk of bias [28, 31] due to  
261 inappropriate randomization and/or allocation concealment. For the remaining 12 studies, we were  
262 unable to comprehensively evaluate the risk of bias due to a lack of information [26, 29, 30, 32-40].  
263 **(S1 Fig).**

## 264 **Publication bias**

265 We checked the funnel plots of the main outcomes for asymmetry as planned; however, we included  
266 less than 10 RCTs in each main outcome, such that the funnel plots may not reliably detect evidence  
267 of departure bias.

## 268 **Main outcomes**

### 269 **Effect on gastrointestinal symptoms and feeding tolerance**

270 Thirteen studies evaluated the effect of prokinetics on gastrointestinal symptoms and/or feeding  
271 tolerance in adult critically ill patients receiving gastric feeding [26-30, 32-34, 36-40].

272 The main results obtained are as follows: gastric emptying, GRV, diarrhea, constipation, feeding  
273 complications and feeding intolerance. Gastric emptying was measured by the drug model of  
274 acetaminophen absorption or the <sup>13</sup>C-octanoic acid breath test with calculation of the gastric emptying  
275 time, gastric emptying coefficient or area under the plasma concentration-time curve. The various  
276 outcome definitions, especially for gastric tube tolerance, precluded quantitative synthesis of the data.

277 As a class of drugs, prokinetic agents appear to have positive effects on gastrointestinal function and  
278 improving feeding tolerance. Ten of the thirteen studies reported positive effects on improving gastric  
279 emptying and/or resolution of feeding intolerance in critically ill patients with the use of prokinetic  
280 agents. However, two studies suggested that metoclopramide had no effect on decreasing

281 gastrointestinal complications in adult neurocritical patients or critical traumatic brain injury patients.  
282 One study reported that rikkunshito did not improve the achievement of enteral calorie targets in  
283 critically ill adults (**Table 2**).

284 **Table 2. Effects on gastrointestinal symptoms and feeding tolerance**

| Study                                          | Population (sample size)                                                   | Intervention                                                          | Outcome                                                                                                                                                                                 | P Value        | Conclusions                                                                                                                             |
|------------------------------------------------|----------------------------------------------------------------------------|-----------------------------------------------------------------------|-----------------------------------------------------------------------------------------------------------------------------------------------------------------------------------------|----------------|-----------------------------------------------------------------------------------------------------------------------------------------|
| Sustic et al<br>2005 (Croatia)<br>[39]         | Cardiosurgical patients after CABG surgery (40)                            | 1) Metoclopramide 10 mg i.v.;<br>2) Control group: saline.            | AUC <sub>120</sub> ; C <sub>max</sub> .<br>574±296; 8.51±2.2<br>429±309; 5.15±2.8                                                                                                       | 0.027; 0.007   | In CABG surgery patients with early enteral feeding, a single dose of intravenous metoclopramide effectively improves gastric emptying. |
| Nursal et al<br>2007 (Turkey)<br>[32]          | Traumatic brain injury patients with Glasgow Coma Scores of 3–11 (19)      | 1) Metoclopramide 10 mg i.v. q8h×5 days;<br>2) Control group: saline. | FI; feeding complications; AUC <sub>60</sub> at day 5; C <sub>max</sub> day 5;<br>4/10 (40%); 5/10 (50%);<br>589.6±457.8; 15.8±12.9<br>2/9 (22.2%); 3/9 (33.3%); 560±432.9;<br>12.0±9.9 | NS; NS; NS; NS | The results were unable to reveal any advantage of using metoclopramide in TBI patients.                                                |
| Acosta-Escribano et al<br>2014 (Spain)<br>[26] | Adult neuro-critical patients, Glasgow Coma Scores of 14 to 9 points (109) | 1) Metoclopramide 10 mg i.v.;<br>2) Placebo: saline.                  | Incidence of gastrointestinal complications; Incidence of GRV>500 mL at day 5;<br>29/58 (50%); 16/58 (28%)<br>22/51 (45%); 11/51 (22%)                                                  | NS; NS         | Metoclopramide has no effect on decreasing gastrointestinal complications in adult neuro-critical patients                              |

|                                        |                                                                       |                                                                                                  |                                                                                                                                                                                             |                           |                                                                                                                                                                                                                                                                                                                                                              |
|----------------------------------------|-----------------------------------------------------------------------|--------------------------------------------------------------------------------------------------|---------------------------------------------------------------------------------------------------------------------------------------------------------------------------------------------|---------------------------|--------------------------------------------------------------------------------------------------------------------------------------------------------------------------------------------------------------------------------------------------------------------------------------------------------------------------------------------------------------|
| Rajan et al<br>2017 (India)<br>[38]    | Critically ill cirrhotic patients in a liver intensive care unit (72) | 1) Metoclopramide i.v.;<br>2) Erythromycin i.v.;<br>3) Placebo.                                  | Resolution of FI; Decrease in GRV beyond 24 hrs; the time to restart enteral nutrition (days)<br>8.7%; no report; 2.61±0.72<br>24%; no report; 2.20±0.91<br>no report; no report; 3.47±1.29 | 0.026; no report;<br>0.03 | Early detection and the addition of prokinetics facilitate the resolution of FI in critically ill cirrhotic patients. Erythromycin is safe and superior to metoclopramide for early resolution of gut paralysis in critically ill cirrhotic patients.                                                                                                        |
| Ritz et al 2005<br>(Australia)<br>[33] | Mixed medical/surgical intensive care unit patients (35)              | 1) <b>Erythromycin 70 mg i.v.;</b><br>2) Erythromycin 200 mg i.v.;<br>3) Placebo, saline (0.9%). | Gastric emptying coefficient; gastric half-emptying time ( $t_{1/2}$ )<br>3.8 (3.3-4.0); 98 (88-112) min<br>4.0 (3.6-4.2); 86 (75-104) min<br>2.9 (2.5-3.7); 122 (102-190) min              | <0.05; <0.05              | Treatment with 70 and 200 mg of intravenous erythromycin is equally effective in accelerating gastric emptying in critically ill patients. Doses as low as 70 mg (approx. 1 mg/kg) accelerate gastric emptying in critically ill patients, improving the success of enteral feeding. This effect is observed only in patients with delayed gastric emptying. |

|                                                              |                                                                                  |                                                                            |                                                                                                                                                                                        |                         |                                                                                                                                                                                           |
|--------------------------------------------------------------|----------------------------------------------------------------------------------|----------------------------------------------------------------------------|----------------------------------------------------------------------------------------------------------------------------------------------------------------------------------------|-------------------------|-------------------------------------------------------------------------------------------------------------------------------------------------------------------------------------------|
| Spapen et al<br>1995<br>(Belgium) [34]                       | Adult<br>medical/surgical<br>intensive care unit<br>patients (21)                | 1) Cisapride 10 mg q6h NG;<br>2) No treatment.                             | Gastric residue over one-week;<br>gastric emptying time $T_{1/2}$ ;<br>17.7±8.9 mL; 18±7 min<br>94.5±33.3 mL; 78±40 min                                                                | <0.001; <0.005          | Gastric emptying in critically<br>ill, sedated, and mechanically<br>ventilated patients can be<br>significantly improved by<br>adding cisapride to a routine<br>enteral feeding protocol. |
| Heyland et al<br>1996 (Canada)<br>[36]                       | Mixed intensive care<br>unit patients (72)                                       | 1) Cisapride 20 mg;<br>2) An identical placebo.                            | Differences (Day 2 - Day 1) in $\Delta C_{max}$ ;<br>$\Delta t_{max}$ ; $\Delta AUC_{180}$<br>49.1±10.7; -40.8±12.0; 5534±1349<br>12.3±7.0; -4.2±10.4; 2832±769                        | 0.005; 0.02; 0.09       | Cisapride enhances gastric<br>emptying in critically ill<br>patients                                                                                                                      |
| Chapman et al,<br>2016<br>(Australia)<br>[27]                | Mixed intensive care<br>unit patients (33)                                       | <b>1) GSK962040 (50 mg) NG;</b><br>2) GSK962040 (75 mg) NG;<br>3) Placebo. | Baseline vs. post gastric emptying<br>time $BT_{1/2}$ ; $AUC_{240}$<br>0.65 (0.39,0.1.08); 2.50 (1.68,3.72)<br>1.85 (0.82,4.15); 0.72 (0.39,1.36)<br>1.21 (0.68,2.15); 1.33(0.85,2.06) | No report; no<br>report | A single enteral dose of<br>camicinal (50 mg), but not 75<br>mg, accelerates gastric<br>emptying and increases<br>glucose absorption in feed-<br>intolerant critically ill patients.      |
| Mokhtari et al<br>2009 (Islamic<br>Republic of<br>Iran) [37] | Critically ill adult<br>respiratory distress<br>syndrome (ARDS)<br>patients (32) | 1) Ginger NG,<br>2) Placebo.                                               | Feeding tolerated in the first 48 hrs;<br>feeding tolerated during the entire<br>study period<br>51%; 92%<br>57%; 93%                                                                  | <0.005; 0.42            | Supplementing the diet with<br>ginger extract in ARDS<br>patients reduces the delayed<br>gastric emptying risk.                                                                           |

|                                          |                                            |                                                                                                                                                                                                                                                                                                     |                                                                                                                                                                                                                                                                                                                                 |                           |                                                                                                                                                                                                                              |
|------------------------------------------|--------------------------------------------|-----------------------------------------------------------------------------------------------------------------------------------------------------------------------------------------------------------------------------------------------------------------------------------------------------|---------------------------------------------------------------------------------------------------------------------------------------------------------------------------------------------------------------------------------------------------------------------------------------------------------------------------------|---------------------------|------------------------------------------------------------------------------------------------------------------------------------------------------------------------------------------------------------------------------|
| Guo JH, et al<br>2012 (China)<br>[29]    | Mixed intensive care<br>unit patients (80) | <p>1) <b>Traditional Chinese medicine group: Chenxia Sijunzi decoction;</b></p> <p>2) Western medicine group: mosapride dispersible tablets 5 mg and multienzyme tablets NG;</p> <p>3) Control group: routine symptomatic treatment without any medicines to promote gastrointestinal function.</p> | <p>The time to bowel sound recovery; the time to passage of gas by anus recovery; the time to bowel movement recovery</p> <p>41.02±7.52<sup>a</sup>; 49.90±6.95<sup>a</sup>; 58.22±6.71<sup>a</sup></p> <p>44.02±6.23<sup>a</sup>; 51.32±5.12<sup>a</sup>; 60.91±3.72<sup>a</sup></p> <p>54.62±5.51; 64.68±9.47; 78.20±7.11</p> | <sup>a</sup> P<0.01       | Chenxia Sijunzi decoction can promote severe patients' gastrointestinal function recovery. No significant differences in each testing index were found between the traditional Chinese medicine and Western medicine groups. |
| Kooshki et al<br>2018 (Iran)<br>[30]     | Mixed intensive care<br>unit patients (60) | <p>1) Fenugreek seed powder 3 g q12h NG;</p> <p>2) Routine care.</p>                                                                                                                                                                                                                                | <p>GRV at the 5<sup>th</sup> day; diarrhea; constipation; respiratory aspiration at 5<sup>th</sup>/6<sup>th</sup> days</p> <p>28.06±9.23; 1/30 (3.3%); 3/30 (10%); 1/30 (3.3%)</p> <p>38.94±9.54; 6/30 (20%); 21/30 (70%); 10/30 (33.3%)</p>                                                                                    | 0.001; 0.04; 0.001; 0.005 | Beneficial effects of fenugreek seeds on food intolerance in critically ill patients.                                                                                                                                        |
| Tahershamsi et al<br>2018 (Iran)<br>[40] | Mixed intensive care<br>unit patients (50) | <p>1) Gastrolit (<i>Zataria multiflora</i>) (20 drops) q8h× 4 days;</p> <p>2) Placebo = water.</p>                                                                                                                                                                                                  | <p>GRV on the second, third, and fourth days</p> <p>The data could not be extracted</p>                                                                                                                                                                                                                                         | All P<0.0001              | Gastrolit can decrease GRV in mechanically ventilated patients                                                                                                                                                               |

|                                |                                       |                                                                                                            |                                                                                                                                                                                                           |            |                                                                                                                                    |
|--------------------------------|---------------------------------------|------------------------------------------------------------------------------------------------------------|-----------------------------------------------------------------------------------------------------------------------------------------------------------------------------------------------------------|------------|------------------------------------------------------------------------------------------------------------------------------------|
| Doi et al 2019<br>(Japan) [28] | Mixed intensive care<br>unit patients | <b>1) Rikkunshito 5 g</b> q8h ×5 days;<br>2) Rikkunshito 2.5 g q8h×5 days;<br>3) No rikkunshito (control). | GRV; the percentage of the target<br>energy at the 5 <sup>th</sup> day; the target<br>energy was achieved at the 5 <sup>th</sup> day<br>No report; 62%; 63%<br>No report; 40%; 38%<br>No report; 59%; 56% | NS; NS; NS | Standard- or high-dose<br>rikkunshito did not improve<br>achievement of the enteral<br>calorie target in critically ill<br>adults. |
|--------------------------------|---------------------------------------|------------------------------------------------------------------------------------------------------------|-----------------------------------------------------------------------------------------------------------------------------------------------------------------------------------------------------------|------------|------------------------------------------------------------------------------------------------------------------------------------|

285 FI, feeding intolerance; NS, not significant; <sup>a</sup>*P*<0.01 compared with the control group.



## 286 **Effect on hospital or ICU length of stay**

287 The effect of prokinetics on hospital length of stay was examined by five studies [26, 28-30, 32].  
288 These five studies, which enrolled a total of 250 patients, demonstrated a significant difference in the  
289 hospital length of stay between the prokinetic agent-treated group and the control group (MD -3.21,  
290 95% CI -5.35, -1.06; P = 0.003; I<sup>2</sup> = 28%) (**Fig 2**). Three studies evaluated the effect of prokinetics on  
291 ICU length of stay in the critical care setting [26, 28, 30]. These three studies, enrolling a total of 186  
292 patients, showed that the prokinetic agents appear to have a positive effect on shortening ICU length  
293 of stay (MD -2.03, 95% CI -3.96, -0.10; P = 0.04; I<sup>2</sup> = 0%) (**Fig 3**). Additionally, the separate effects  
294 of different prokinetics on the ICU length of stay and hospital length of stay are presented in **S3**  
295 **Table**.

296 **Fig 2. Forest plot for hospital length of stay outcomes.** IV: inverse variance; CI: confidence interval.

297 **Fig 3. Forest plot for ICU length of stay outcomes.** IV: inverse variance; CI: confidence interval.

## 298 **Effect on reported adverse events**

299 Seven studies reported events that met the definition of adverse events in 757 critically ill  
300 patients [26-28, 30-32, 35]. The meta-analysis showed no significant difference in the risk of  
301 reported adverse events between the prokinetic agent group and the control group (RR 1.13,  
302 95% CI 0.92, 1.38; P = 0.25; I<sup>2</sup> = 0%) (**S2 Fig**).

## 303 **Effect on all-cause mortality**

304 The effect of prokinetic agents on all-cause mortality has been examined by six studies in 691  
305 critically ill patients [26, 28, 31, 32, 34, 35]. There was no significant difference in all-cause  
306 mortality between the prokinetic agent group and the control group (RR 0.96, 95% CI 0.81,  
307 1.14; P = 0.64; I<sup>2</sup> = 0%) (**S3 Fig**).

## 308 **Subgroup analysis**

309 Although no significant heterogeneity was found, we performed subgroup analyses to  
310 determine whether important subgroup differences existed. In the subgroup analysis  
311 stratified by type of prokinetic agents, no significant subgroup differences were detected in the  
312 clinical outcomes of hospital length of stay, ICU length of stay, reported adverse events and all-cause  
313 mortality (**S4, 5, 6 and 7 Figs**). Furthermore, no study compared the combination of prokinetics  
314 to placebo or no treatment. Only one study about the preventive usage of prokinetics for risk  
315 patients demonstrated the outcome of reported adverse events [27]. The others were about  
316 the preventive usage of prokinetics for all patients. The subgroup analysis result of the  
317 preventive usage of prokinetics for all patients did not show important changes in the pooled  
318 effects of the reported adverse events.

## 319 **Sensitivity analysis**

320 The sensitivity analysis, which was performed by excluding the trials with a high risk of bias [28, 31],  
321 did not show important changes in the pooled effects of hospital length of stay, ICU length of stay,  
322 reported adverse events, or all-cause mortality. (Supplemental materials: **S8, 9, 10 and 11 Figs**).

## 323 **Certainty of evidence**

324 The certainty of evidence was moderate for the clinical outcome of all-cause mortality. However, the  
325 certainty of evidence was low for the clinical outcomes of ICU length of stay, hospital length of stay  
326 and reported adverse events. The details of the risk of bias and quality assessment are outlined in  
327 **Table 3**.

**Table 3. GRADE evidence profile of the efficacy and safety of prokinetics in critically ill adult patients receiving gastric feeding tubes**

| No. of studies                           | Study design      | Certainty assessment  |                           |                          |                           |                      | No. of patients    |                    | Effect                           |                                                                                        | Certainty        | Importance |
|------------------------------------------|-------------------|-----------------------|---------------------------|--------------------------|---------------------------|----------------------|--------------------|--------------------|----------------------------------|----------------------------------------------------------------------------------------|------------------|------------|
|                                          |                   | Risk of bias          | Inconsistency             | Indirectness             | Imprecision               | Other considerations | Prokinetics        | Placebo            | Relative (95% CI)                | Absolute (95% CI)                                                                      |                  |            |
| <b>Effect on ICU length of stay</b>      |                   |                       |                           |                          |                           |                      |                    |                    |                                  |                                                                                        |                  |            |
| 3                                        | randomized trials | serious <sup>1</sup>  | not serious <sup>2</sup>  | not serious <sup>3</sup> | serious <sup>4</sup>      | none <sup>5</sup>    | 96                 | 90                 | -                                | MD <b>2.03 days lower</b><br>(3.96 days lower to 0.1 days lower)                       | ⊕⊕○○<br>LOW      | IMPORTANT  |
| <b>Effect on hospital length of stay</b> |                   |                       |                           |                          |                           |                      |                    |                    |                                  |                                                                                        |                  |            |
| 5                                        | randomized trials | serious <sup>6</sup>  | not serious <sup>7</sup>  | not serious <sup>3</sup> | serious <sup>8</sup>      | none <sup>5</sup>    | 141                | 109                | -                                | MD <b>3.21 days lower</b><br>(5.35 days lower to 1.06 days lower)                      | ⊕⊕○○<br>LOW      | IMPORTANT  |
| <b>Effect on reported adverse events</b> |                   |                       |                           |                          |                           |                      |                    |                    |                                  |                                                                                        |                  |            |
| 7                                        | randomized trials | serious <sup>9</sup>  | not serious <sup>10</sup> | not serious <sup>3</sup> | serious <sup>11</sup>     | none                 | 105/320<br>(32.8%) | 120/437<br>(27.5%) | <b>RR 1.13</b><br>(0.92 to 1.38) | <b>40 more RAE per 1,000 patients</b><br>(from 20 fewer RAE to 100 more RAE)           | ⊕⊕○○<br>LOW      | IMPORTANT  |
| <b>Effect on all-cause mortality</b>     |                   |                       |                           |                          |                           |                      |                    |                    |                                  |                                                                                        |                  |            |
| 6                                        | randomized trials | serious <sup>12</sup> | not serious <sup>13</sup> | not serious <sup>3</sup> | not serious <sup>14</sup> | none                 | 114/286<br>(39.9%) | 174/405<br>(43.0%) | <b>RR 0.96</b><br>(0.81 to 1.14) | <b>30 fewer deaths per 1,000 patients</b><br>(from 100 fewer deaths to 40 more deaths) | ⊕⊕⊕○<br>MODERATE | CRITICAL   |

329 CI: confidence interval; RR: risk ratio; MD: mean difference; RAE: reported adverse events.

330 1. We downgraded the quality of evidence for risk of bias by one level. Two of three included studies had a high or unclear risk of bias.

331 2. We did not downgrade for inconsistency,  $I^2=0\%$  and  $\text{Chi}^2 = 1.45$ ,  $P=0.48$ .

332 3. Although the studies included any critically ill patient, we did not downgrade for indirectness.

333 4. We downgraded the quality of evidence for imprecision by one level because the total population size is less than 400. The 95% confidence interval contained a small benefit

334 that did not meet the clinical decision threshold (min. one day).  
335 5. We did not downgrade for publication bias, although we could not assess this category reliably due to the small number of eligible studies. Not all included studies showed  
336 benefits of the studied intervention.  
337 6. We downgraded the quality of evidence for risk of bias by one level. Most studies had an unclear risk of bias. In addition, one study lacked allocation concealment and blinding.  
338 7. We did not downgrade for inconsistency,  $I^2=28\%$  and  $Chi^2 = 5.52$ ,  $P=0.24$ .  
339 8. We downgraded the quality of evidence by one level for imprecision because the population size is less than 400.  
340 9. We downgraded the quality of evidence for risk of bias by one level. Most studies had an unclear risk of bias. In addition, two studies lacked allocation concealment and/or  
341 blinding.  
342 10. We did not downgrade for inconsistency,  $I^2=0\%$  and  $Chi^2 = 1.64$ ,  $P=0.95$ .  
343 11. We downgraded the quality of evidence for imprecision by one level because the 95% confidence interval around the pooled effect included both no effect and appreciable  
344 harm (a relative risk increase greater than 25%).  
345 12. We downgraded the quality of evidence for risk of bias by one level. Most studies had an unclear risk of bias. In addition, two studies lacked allocation concealment, and two  
346 studies lacked blinding.  
347 13. We did not downgrade for inconsistency,  $I^2=0\%$  and  $Chi^2 = 4.52$ ,  $P=0.48$ .  
348 14. We did not downgrade for imprecision because the 95% confidence interval around the pooled effect did not include both no effect and an appreciable benefit (a relative risk  
349 reduction greater than 25%) or appreciable harm (a relative risk increase greater than 25%).

## 350 Discussion

351 In this systematic review, we conducted a comprehensive literature search and used objective criteria  
352 for study inclusion. Fifteen studies were included in the final analysis. Because of small sample sizes  
353 and a relatively small amount of research, the accuracy of the pooled effect is lacking in quantitative  
354 analysis. Most studies (10 of 13, 76.92%) found that prokinetic agents showed beneficial effects on  
355 feeding tolerance in critically ill adults. The negative studies (3 of 13, 23.08%) were hampered by   
356 special populations of neuro-critical patients and critical traumatic brain injury patients taking  
357 metoclopramide and by the use of the specific drug rikkunshito. Furthermore, the use of prokinetic  
358 agents in critically ill patients receiving gastric feeding may reduce the ICU or hospital length of stay,  
359 but the certainty of evidence was low due to risk of bias and imprecision. Prokinetics did not  
360 significantly reduce the risks of reported adverse events or all-cause mortality.

361 In this study, we examined the effect of prokinetic agents on gastrointestinal symptoms, feeding  
362 tolerance and clinical outcomes. Compared to the control group, prokinetics did not reduce the risk of  
363 mortality; these results were the same as the results of the meta-analysis by Lewis, K. et al. [14],  
364 but our methods are different. Lewis, K. et al. [14] defined feeding intolerance as either GRV  $\geq 150$   
365 mL, vomiting, or abdominal distention resulting in feeding interruption. This definition may be  
366 considered obsolete [15]. We defined gastric feeding intolerance as either GRV  $\geq 500$  mL or  
367 concomitant symptoms of nausea, vomiting, abdominal distention, regurgitation or other symptoms  
368 resulting in feeding interruption in critically ill adult patients receiving gastric feeding tubes. We  
369 excluded studies that discontinued or interrupted gastric feeding prematurely following the  
370 disappearance of gastric feeding intolerance. Under this latest definition, our meta-analysis found  
371 some new studies [26-30, 33, 34], and we identified 5 studies regarding the administration of  
372 prokinetics including herbal medicines/natural medicines in critically ill adult patients receiving  
373 gastric feeding tubes [28-30, 37, 40].

374 Additionally, we found that prokinetic agents might reduce the ICU or hospital length of stay for

375 critically ill patients receiving gastric feeding. However, the number of studies and the sample size  
376 were very small, and the certainty of evidence was low. Furthermore, no significant difference was  
377 found between prokinetic agent groups and placebo/no treatment in the risks of reported adverse  
378 events and all-cause mortality. Therefore, we cannot draw a convincing conclusion that the use of  
379 prokinetics can improve clinical outcomes in critically ill adults. We recommend that more research  
380 should be conducted in this field.

381 This study has several limitations. First, RCTs from 21 published original studies or trials registered in  
382 the International Clinical Trials Registry Platform (WHO) or clinicaltrials.gov were identified.  
383 However, 6 trials were completed, but the results were not available, which might lead to the omission  
384 of trials meeting the inclusion criteria and might have publication bias. Second, some included trials  
385 did not test the baseline status of feeding intolerance for all participants. The subgroup results might  
386 have been different if all individuals were tested. Third, we were unable to comprehensively evaluate  
387 the risk of bias in 12 studies with a lack of information. Fourth, in each outcome, the total sample size  
388 was relatively small, which likely had inadequate power to detect a difference in treatment effect. We  
389 recommend that more original studies about this topic be conducted.

## 390 **Conclusion**

391 As a class of drugs, prokinetic agents may improve gastric feeding tolerance in critically ill adults.  
392 However, the certainty of the evidence suggesting that prokinetic agents are effective for reducing the  
393 ICU or hospital length of stay is low. There was also no significant reduction in the risk of reported  
394 adverse events and all-cause mortality. Additional RCTs are needed to determine the effect of  
395 prokinetics on clinical outcomes in critically ill patients in the future.

## 396 **Acknowledgments**

397 We are grateful to all the staff in this study for their teamwork and persistent efforts, and we are also  
398 thankful to the Group of People with Highest Risk of Drug Exposure of the International Network for

399 the Rational Use of Drugs, China, and the Evidence-Based Pharmacy Committee of the Chinese  
400 Pharmaceutical Association for providing methodologies.

## 401 **Ethics approval and consent to participate**

402 Not applicable.

## 403 **Competing interests**

404 We declare that we have no conflicts of interest.

## 405 **Funding**

406 The funders had no role in the study design, data collection and analysis, the decision to publish, or  
407 preparation of the manuscript.

## 408 **Author Contributions**

409 LLZ conceived the study and designed the study. RP and HLL had full access to all of the data in the  
410 study, and take responsibility for the integrity of the data and the accuracy of the data analysis. RP and  
411 HLL developed and tested the data collection form. All authors acquired the data. HLL and RP  
412 conducted the analysis, interpreted the data, and drafted the manuscript. All authors critically revised  
413 the manuscript. LLZ is the guarantor.

## 414 **Consent for publication**

415 Written informed consent for publication was obtained from all participants.

## 416 **Availability of data and material**

417 All data generated or analyzed during this study are included in this published article.

## 418 **References**

- 419 1. Lew CCH, Yandell R, Fraser RJL, Chua AP, Chong MFF, Miller M. Association Between Malnutrition  
420 and Clinical Outcomes in the Intensive Care Unit: A Systematic Review [Formula: see text]. *JPEN J*  
421 *Parenter Enteral Nutr.* 2017;41(5):744-758.
- 422 2. McClave SA, Taylor BE, Martindale RG, Warren MM, Johnson DR, Braunschweig C, McCarthy MS,  
423 Davanos E, Rice TW, Cresci GA, Gervasio JM, Sacks GS, Roberts PR, Compher C, Society of Critical  
424 Care M, American Society for P, Enteral N. Guidelines for the Provision and Assessment of Nutrition  
425 Support Therapy in the Adult Critically Ill Patient: Society of Critical Care Medicine (SCCM) and  
426 American Society for Parenteral and Enteral Nutrition (A.S.P.E.N.). *JPEN J Parenter Enteral Nutr.*  
427 2016;40(2):159-211.
- 428 3. Singer P, Blaser AR, Berger MM, Alhazzani W, Calder PC, Casaer MP, Hiesmayr M, Mayer K,  
429 Montejo JC, Pichard C, Preiser JC, van Zanten ARH, Oczkowski S, Szczeklik W, Bischoff SC. ESPEN  
430 guideline on clinical nutrition in the intensive care unit. *Clin Nutr.* 2019;38(1):48-79.
- 431 4. Elke G, Felbinger TW, Heyland DK. Gastric residual volume in critically ill patients: a dead marker or  
432 still alive?. [Review].1.
- 433 5. Blaser AR, Starkopf J, Kirsimagi U, Deane AM. Definition, prevalence, and outcome of feeding  
434 intolerance in intensive care: a systematic review and meta-analysis. *Acta Anaesthesiol Scand.*  
435 2014;58(8):914-922.
- 436 6. Reintam Blaser A, Malbrain ML, Starkopf J, Fruhwald S, Jakob SM, De Waele J, Braun JP, Poeze M,  
437 Spies C. Gastrointestinal function in intensive care patients: terminology, definitions and management.  
438 Recommendations of the ESICM Working Group on Abdominal Problems. *Intensive Care Med.*  
439 2012;38(3):384-394.
- 440 7. Hu B, Sun R, Wu A, Ni Y, Liu J, Guo F, Ying L, Ge G, Ding A, Shi Y, Liu C, Xu L, Jiang R, Lu J, Lin  
441 R, Zhu Y, Wu W, Xie B. Prognostic Value of Prolonged Feeding Intolerance in Predicting All-Cause  
442 Mortality in Critically Ill Patients: A Multicenter, Prospective, Observational Study. *JPEN J Parenter*  
443 *Enteral Nutr.* 2019.
- 444 8. Gungabissoon U, Hacquoil K, Bains C, Irizarry M, Dukes G, Williamson R, Deane AM, Heyland DK.  
445 Prevalence, risk factors, clinical consequences, and treatment of enteral feed intolerance during critical  
446 illness. *JPEN J Parenter Enteral Nutr.* 2015;39(4):441-448.
- 447 9. Heyland DK, Dhaliwal R, Drover JW, Gramlich L, Dodek P, Canadian Critical Care Clinical Practice  
448 Guidelines C. Canadian clinical practice guidelines for nutrition support in mechanically ventilated,  
449 critically ill adult patients. *JPEN J Parenter Enteral Nutr.* 2003;27(5):355-373.
- 450 10. Consensus of early enteral nutrition clinical practice in critically ill patients. *Chinese Critical Care*  
451 *Medicine.* 2018;30(8):715-721.
- 452 11. Taylor BE, McClave SA, Martindale RG, Warren MM, Johnson DR, Braunschweig C, McCarthy MS,  
453 Davanos E, Rice TW, Cresci GA, Gervasio JM, Sacks GS, Roberts PR, Compher C, Society of Critical  
454 Care M, American Society of P, Enteral N. Guidelines for the Provision and Assessment of Nutrition  
455 Support Therapy in the Adult Critically Ill Patient: Society of Critical Care Medicine (SCCM) and



- 456 American Society for Parenteral and Enteral Nutrition (A.S.P.E.N.). *Crit Care Med.* 2016;44(2):390-  
457 438.
- 458 12. Reintam Blaser A, Starkopf J, Alhazzani W, Berger MM, Casaer MP, Deane AM, Fruhwald S,  
459 Hiesmayr M, Ichai C, Jakob SM, Loudet CI, Malbrain ML, Montejo Gonzalez JC, Paugam-Burtz C,  
460 Poeze M, Preiser JC, Singer P, van Zanten AR, De Waele J, Wendon J, Wernerman J, Whitehouse T,  
461 Wilmer A, Oudemans-van Straaten HM, Function EWGoG. Early enteral nutrition in critically ill  
462 patients: ESICM clinical practice guidelines. *Intensive Care Med.* 2017;43(3):380-398.
- 463 13. Peng R. The efficacy and safety of administration of prokinetics improve clinical outcomes in critically  
464 ill patients is still quite unclear. *Clinical Nutrition.* 2020;39:307-309.
- 465 14. Lewis K, Alqahtani Z, McIntyre L, Almenawer S, Alshamsi F, Rhodes A, Evans L, Angus DC,  
466 Alhazzani W. The efficacy and safety of prokinetic agents in critically ill patients receiving enteral  
467 nutrition: A systematic review and meta-analysis of randomized trials. *Critical Care.* 2016;20 (1) (no  
468 pagination)(259).
- 469 15. Dive A. Benefit of prokinetics during enteral nutrition: still searching for a piece of evidence. *Crit Care.*  
470 2016;20(1):341.
- 471 16. Higgins JPT, Green S, eds. Cochrane Handbook for Systematic Reviews of Interventions, version 5.1.0  
472 (updated March 2011). Cochrane Collaboration website. <http://training.cochrane.org/handbook>. 2011.  
473 Accessed November 22, 2017.
- 474 17. Liberati A, Altman DG, Tetzlaff J, Mulrow C, Gotzsche PC, Ioannidis JP, Clarke M, Devereaux PJ,  
475 Kleijnen J, Moher D. The PRISMA statement for reporting systematic reviews and meta-analyses of  
476 studies that evaluate health care interventions: explanation and elaboration. *J Clin Epidemiol.*  
477 2009;62(10):e1-34.
- 478 18. Gupta SK. Intention-to-treat concept: A review. *Perspect Clin Res.* 2011;2(3):109-112.
- 479 19. Schulz KF, Altman DG, Moher D, Group C. CONSORT 2010 statement: updated guidelines for  
480 reporting parallel group randomised trials. *PLoS Med.* 2010;7(3):e1000251.
- 481 20. Luo D, Wan X, Liu J, Tong T. Optimally estimating the sample mean from the sample size, median,  
482 mid-range, and/or mid-quartile range. *Stat Methods Med Res.* 2018;27(6):1785-1805.
- 483 21. Wan X, Wang W, Liu J, Tong T. Estimating the sample mean and standard deviation from the sample  
484 size, median, range and/or interquartile range. *BMC Med Res Methodol.* 2014;14:135.
- 485 22. Deeks JJ. Issues in the selection of a summary statistic for meta-analysis of clinical trials with binary  
486 outcomes. *Stat Med.* 2002;21(11):1575-1600.
- 487 23. Borenstein M, Hedges LV, Higgins JP, Rothstein HR. A basic introduction to fixed-effect and random-  
488 effects models for meta-analysis. *Res Synth Methods.* 2010;1(2):97-111.
- 489 24. Furukawa TA, Watanabe N, Omori IM, Montori VM, Guyatt GH. Association between unreported  
490 outcomes and effect size estimates in Cochrane meta-analyses. *JAMA.* 2007;297(5):468-470.
- 491 25. Guyatt GH, Oxman AD, Vist GE, Kunz R, Falck-Ytter Y, Alonso-Coello P, Schunemann HJ, Group  
492 GW. GRADE: an emerging consensus on rating quality of evidence and strength of recommendations.  
493 *BMJ.* 2008;336(7650):924-926.

- 494 26. Acosta-Escribano J, Almanza Lopez S, Plumed Martin L, Garcia Martinez MA, Tajadura Manjarin N.  
495 The metoclopramide effect on enteral nutrition tolerance and mechanical ventilation associated  
496 pneumonia in neuro critically ill patients. *Nutricion hospitalaria*. 2014;29(6):1345-1351.
- 497 27. Chapman MJ, Deane AM, O'Connor SL, Nguyen NQ, Fraser RJL, Richards DB, Hacquoil KE, Vasist  
498 Johnson LS, Barton ME, Dukes GE. The effect of camicinal (GSK962040), a motilin agonist, on gastric  
499 emptying and glucose absorption in feed-intolerant critically ill patients: a randomized, blinded,  
500 placebo-controlled, clinical trial <https://www.ncbi.nlm.nih.gov/pmc/articles/PMC4967996/>. *Critical*  
501 *care*. 2016;20(1).
- 502 28. Doi M, Miyamoto K, Shimokawa T, Ariyasu H, Kaneko M, Yonemitsu T, Nakashima T, Matsumoto H,  
503 Shibata M, Shibata N, Soda M, Kitaichi K, Kato S. The effect of standard and high dose of rikkunshito  
504 on achievement of enteral nutrition target in critically ill patients: a pilot randomized controlled trial.  
505 *Acute medicine and surgery*. 2019.
- 506 29. Guo JH, Chen G, Yang SQ, Wei MH, Chen X. Clinical observation of the role of Chenxia Sijunzi  
507 decoction in promoting the recovery of gastrointestinal function in critically ill patients. *Zhongguo wei*  
508 *zhong bing ji jiu yi xue [Chinese critical care medicine]*. 2012;24(11):674-676.
- 509 30. Kooshki A, Khazaei Z, Zarghi A, Rad M, Mohammadi HG, Tabaraie Y. Effects of fenugreek seed  
510 powder on enteral nutrition tolerance and clinical outcomes in critically ill patients: a randomized  
511 clinical trial. *Biomedical research and therapy*. 2018;5(7):2528-2537.
- 512 31. Nassaji M, Ghorbani R, Frozeshfard M, Mesbahian F. Effect of metoclopramide on nosocomial  
513 pneumonia in patients with nasogastric feeding in the intensive care unit. *La revue de sante de la*  
514 *Mediterranee orientale / al-Majallah al-sihhiyah li-sharq al-mutawassit [Eastern Mediterranean health*  
515 *journal]*. 2010;16(4):371-374.
- 516 32. Nursal TZ, Erdogan B, Noyan T, Cekinmez M, Atalay B, Bilgin N. The effect of metoclopramide on  
517 gastric emptying in traumatic brain injury. *J Clin Neurosci*. 2007;14(4):344-348.
- 518 33. Ritz MA, Chapman MJ, Fraser RJ, Finnis ME, Butler RN, Cmielewski P, Davidson GP, Rea D.  
519 Erythromycin dose of 70 mg accelerates gastric emptying as effectively as 200 mg in the critically ill.  
520 *Intensive care medicine*. 2005;31(7):949-954.
- 521 34. Spapen HD, Duinslaeger L, Diltor M, Gillet R, Bossuyt A, Huyghens LP. Gastric emptying in  
522 critically ill patients is accelerated by adding cisapride to a standard enteral feeding protocol: results of  
523 a prospective, randomized, controlled trial. *Critical care medicine*. 1995;23(3):481-485.
- 524 35. Yavagal DR, Karnad DR, Oak JL. Metoclopramide for preventing pneumonia in critically ill patients  
525 receiving enteral tube feeding: a randomized controlled trial. *Critical care medicine*. 2000;28(5):1408-  
526 1411.
- 527 36. Heyland DK, Tougas G, Cook DJ, Guyatt GH. Cisapride improves gastric emptying in mechanically  
528 ventilated, critically ill patients. A randomized, double-blind trial. *American journal of respiratory and*  
529 *critical care medicine*. 1996;154(6 Pt 1):1678-1683.
- 530 37. Mokhtari M, Shariatpanahi Z. Ginger extract dietary supplementation effects on delayed gastric  
531 emptying and ventilator-associated pneumonia in adult respiratory distress syndrome patients. *Critical*  
532 *Care*. 2009;1):S56.

- 533 38. Rajan V, Maiwall R, Choudhury AK, Jamwal KD, Benjamin J, Kumar G, Joshi YK, Sarin SK. Early  
534 addition of prokinetics reverses gut paralysis and improves survival in critically ill cirrhotics-An open  
535 label placebo controlled RCT (Feed Intolerance and Treatment-FIT protocol). NCT02528760.  
536 *Hepatology*. 2017;66.
- 537 39. Sustic A, Zelic M, Protic A, Zupan Z, Simic O, Desa K. Metoclopramide improves gastric but not  
538 gallbladder emptying in cardiac surgery patients with early intragastric enteral feeding: randomized  
539 controlled trial. *Croatian medical journal*. 2005;46(2):239-244.
- 540 40. Tahershamsi F, Rezaei K, Khosravi S, Kheyri Z, Memarzadeh MR, Rafie F. Effect of oral drop gastrolit  
541 (*Zataria multiflora*) on gastric residual volume in mechanically ventilated patients hospitalized in the  
542 intensive care units. *Journal of medicinal plants*. 2018;17(68):66-73.
- 543 41. Chapman MJ, Fraser RJ, Kluger MT, Buist MD, De Nichilo DJ. Erythromycin improves gastric  
544 emptying in critically ill patients intolerant of nasogastric feeding. *Critical care medicine*.  
545 2000;28(7):2334-2337.
- 546 42. Deane AM, Lamontagne F, Dukes GE, Neil D, Vasist L, Barton ME, Hacquoil K, Ou X, Richards D,  
547 Stelfox HT, Mehta S, Day AG, Chapman MJ, Heyland DK. Nutrition Adequacy Therapeutic  
548 Enhancement in the Critically Ill: a Randomized Double-Blind, Placebo-Controlled Trial of the Motilin  
549 Receptor Agonist Camicinal (GSK962040): the NUTRIATE Study. *Journal of parenteral and enteral  
550 nutrition*. 2018;42(5):949-959.
- 551 43. Pinilla JC, Samphire J, Arnold C, Liu L, Thiessen B. Comparison of gastrointestinal tolerance to two  
552 enteral feeding protocols in critically ill patients: a prospective, randomized controlled trial. *Journal of  
553 Parenteral and Enteral Nutrition* 2001;25(2):81-6.
- 554 44. Reignier J, Bensaid S, Perrin-Gachadoat D, Burdin M, Boiteau R, Tenaillon A. Erythromycin and early  
555 enteral nutrition in mechanically ventilated patients. *Critical care medicine*. 2002;30(6):1237-1241.
- 556 45. Taylor SJ, Allan K, McWilliam H, Manara A, Brown J, Greenwood R, Toher D. A randomised  
557 controlled feasibility and proof-of-concept trial in delayed gastric emptying when metoclopramide fails:  
558 we should revisit nasointestinal feeding versus dual prokinetic treatment: achieving goal nutrition in  
559 critical illness and delayed gastric emptying: trial of nasointestinal feeding versus nasogastric feeding  
560 plus prokinetics. *Clinical nutrition ESPEN*. 2016;14:1-8.
- 561 46. Boivin MA, Levy H. Gastric feeding with erythromycin is equivalent to transpyloric feeding in the  
562 critically ill. *Critical care medicine*. 2001;29(10):1916-1919.
- 563 47. Euctr ES. A Phase 2, Multicenter, Randomized, Double-Blind, Comparator-Controlled Study of the  
564 Efficacy, Safety, and Pharmacokinetics of Intravenous Ulimorelin (LP101) in Patients with Enteral  
565 Feeding Intolerance. <http://www.who.int/trialsearch/Trial2.aspx?TrialID=EUCTR2016>. 2016.
- 566 48. Hayakawa M, Ono Y, Wada T, Yanagida Y, Sawamura A, Takeda H, Gando S. Effects of rikkunshito  
567 (traditional Japanese medicine) on enteral feeding and the plasma ghrelin level in critically ill patients: a  
568 pilot study. *Journal of intensive care*. 2014;2(1).
- 569 49. Heyland DK, van Zanten ARH, Grau-Carmona T, Evans D, Beishuizen A, Schouten J, Hoiting O,  
570 Bordeje ML, Krell K, Klein DJ, Gonzalez J, Perez A, Brown R, James J, Harris MS, Heyland DK,  
571 Evans DC, Jolley S, Raines R, Krell K, Falls I, Grau-Carmona T, Servia-Goixart L, Perez-Quesada S,

- 572 Herrero-Meseguer JI, Calvo-Herranz E, Lorenzo C, Peredes A, Yebenes-Reyes JC, Garcia-Martinez  
573 MA, Cervera M, Bordeje ML, Fernandez-Ortega JF, Fernandez-Gonzalez I, van Zanten A, Beishuizen A,  
574 Schouten J, Hoiting O, Wilhelmina C, Stelfox T, Posadas J. A multicenter, randomized, double-blind  
575 study of ulimorelin and metoclopramide in the treatment of critically ill patients with enteral feeding  
576 intolerance: PROMOTE trial. *Intensive care medicine*. 2019;45(5):647-656.
- 577 **50.** Irct201112014578N. The effect of acupuncture and traditional pharmacologic therapy on Delayed  
578 Gastric Emptying. <http://www.who.int/trialsearch/Trial2.aspx?TrialID=IRCT201112014578N4>. 2012.
- 579 **51.** Irct201408104365N. Combination of Neostigmine and Metoclopramide to reduce gastric residual  
580 volume in mechanically ventilated ICU patients.  
581 <http://www.who.int/trialsearch/Trial2.aspx?TrialID=IRCT201408104365N16>. 2015.
- 582 **52.** Irct201412044365N. Comparison of the effect of Neostigmine and Metoclopramide on gastric residual  
583 volume in mechanically ventilated ICU patients.  
584 <http://www.who.int/trialsearch/Trial2.aspx?TrialID=IRCT201412044365N18>. 2014.
- 585 **53.** MacLaren R, Patrick WD, Hall RI, Rocker GM, Whelan GJ, Lima JJ. Comparison of cisapride and  
586 metoclopramide for facilitating gastric emptying and improving tolerance to intragastric enteral  
587 nutrition in critically III, mechanically ventilated adults. *Clinical therapeutics*. 2001;23(11):1855-1866.
- 588 **54.** Makkar JK, Gauli B, Jain K, Jain D, Batra YK. Comparison of erythromycin versus metoclopramide for  
589 gastric feeding intolerance in patients with traumatic brain injury: a randomized double-blind study.  
590 *Saudi journal of anaesthesia*. 2016;10(3):308-313.
- 591 **55.** Malekolkottab M, Khalili H, Mohammadi M, Ramezani M, Nourian A. Metoclopramide as intermittent  
592 and continuous infusions in critically ill patients: a pilot randomized clinical trial. *Journal of*  
593 *comparative effectiveness research*. 2017;6(2):127-136.
- 594 **56.** Nct. A Randomized, Double-Blind Study to Evaluate the Safety, Tolerability, and Pharmacodynamics  
595 of a Single Dose of Intravenous TD-8954 Compared With Metoclopramide in Critically Ill Patients  
596 With Enteral Feeding Intolerance. <https://clinicaltrials.gov/show/NCT01953081>. 2013.
- 597 **57.** Nct. Itopride in Feeding Intolerance of Critically-ill Patients Receiving Enteral Nutrition.  
598 <https://clinicaltrials.gov/show/NCT03698292>. 2018.
- 599 **58.** Nguyen N, Chapman M, Fraser R, Sharley V, Kong S, Bryant L, et al. Erythromycin or metoclopramide  
600 for feed intolerance in the critically ill. *Critical care*. 2006;10(Suppl 1).
- 601 **59.** Taylor S, Manara A, Brown J. Treating delayed gastric emptying in critical illness: metoclopramide,  
602 erythromycin and bedside (Contrak[TM]) nasointestinal tube placement. *Journal of the intensive care*  
603 *society*. 2011;12(1):75-.
- 604 **60.** Yanagida Y, Hayakawa M, Yamamoto H, Wada T, Sugano M, Sawamura A, Gando S. Effects of  
605 rikkunshito (traditional Japanese medicine Kampo) on enteral feeding and plasma ghrelin concentration  
606 in critically ill patients: a double-blind, randomized, controlled trial. *Intensive care medicine*.  
607 2013;39:S242-S243.
- 608 **61.** Berne JD, Norwood SH, McAuley CE, Vallina VL, Villareal D, Weston J, McClarty J. Erythromycin  
609 reduces delayed gastric emptying in critically ill trauma patients: a randomized, controlled trial. *Journal*  
610 *of trauma*. 2002;53(3):422-425.

- 611 62. Meissner W, Dohrn B, Reinhart K. Enteral naloxone reduces gastric tube reflux and frequency of  
612 pneumonia in critical care patients during opioid analgesia. *Critical care medicine*. 2003;31(3):776-780.
- 613 63. Shariatpanahi ZV, Taleban FA, Mokhtari M, Shahbazi S. Ginger extract reduces delayed gastric  
614 emptying and nosocomial pneumonia in adult respiratory distress syndrome patients hospitalized in an  
615 intensive care unit. *Journal of critical care*. 2010;25(4):647-650.
- 616 64. Tamion F, Hamelin K, Duflo A, Girault C, Richard JC, Bonmarchand G. Gastric emptying in  
617 mechanically ventilated critically ill patients: effect of neuromuscular blocking agent. *Intensive care  
618 medicine*. 2003;29(10):1717-1722.
- 619 65. Chen JH, Hsieh CB, Chao PC, Liu HD, Chen CJ, Liu YC, Yu JC. Effect of water-soluble contrast in  
620 colorectal surgery: a prospective randomized trial. *World journal of gastroenterology*.  
621 2005;11(18):2802-2805.
- 622 66. Goldhill DR, Toner CC, Tarling MM, Baxter K, Withington PS, Whelpton R. Double-blind,  
623 randomized study of the effect of cisapride on gastric emptying in critically ill patients. *Critical care  
624 medicine*. 1997;25(3):447-451.
- 625 67. Warusevitane A, Karunatilake D, Sim J, Lally F, Roffe C. Safety and effect of metoclopramide to  
626 prevent pneumonia in patients with stroke fed via nasogastric tubes trial. *Stroke*. 2015;46(2):454-460.
- 627 68. Tctr. Efficacy and safety of oral Erythromycin estolate in combination with Metoclopramide versus  
628 Metoclopramide monotherapy in mechanically ventilated patients who developed enteral feeding  
629 intolerance: a randomized double-blind controlled study.  
630 <http://www.who.int/trialsearch/Trial2.aspx?TrialID=TCTR20171004004>. 2017.
- 631 69. NCT02528760. To Determine the Role of Prokinetics in Feed Intolerance in Critically Ill Cirrhosis.  
632 <https://clinicaltrials.gov/show/NCT02528760>. 2015.
- 633 70. NCT02379624. Pectin Start Early Enteral Nutritional Support in Critically Ill Patients.  
634 <https://clinicaltrials.gov/show/NCT02379624>. 2014.
- 635 71. IRCT201610297494N24. The prophylactic effect of cuminum cyminum extract on gastric residual  
636 volume in traumatic patients under ventilator hospitalized in intensive care unit.  
637 <http://www.who.int/trialsearch/Trial2.aspx?TrialID=IRCT201610297494N24>. 2017.
- 638 72. IRCT201009094722N2. The effect of Ginger extract on gastric residual volume in patients with  
639 mechanical ventilation hospitalized in intensive care unit.  
640 <http://www.who.int/trialsearch/Trial2.aspx?TrialID=IRCT201009094722N2>. 2011.
- 641 73. 2015/08/006111 C. Clinical trial to compare the efficacy of two oral prokinetics metoclopramide and  
642 erythromycin in non acceptance of feed in head injury patient.  
643 <http://www.who.int/trialsearch/Trial2.aspx?TrialID=CTRI>. 2015;08(006111).

644

645

646 **Supporting information**

647 **S1 Table. Search strategy**

648 **S2 Table. Excluded studies**

649 **S3 Table. Separate effects of different prokinetic agents on hospital or ICU length of stay**

650 **S4 Table. PRISMA checklist**

651 **S1 Fig. Risk of bias**

652 **S2 Fig. Reported adverse event outcomes**

653 **S3 Fig. All-cause mortality outcomes**

654 **S4 Fig. Subgroup analysis by the type of prokinetic agents for hospital length of stay outcomes**

655 **S5 Fig. Subgroup analysis by the type of prokinetic agents for ICU length of stay outcomes**

656 **S6 Fig. Subgroup analysis by the type of prokinetic agents for reported adverse event outcomes**

657 **S7 Fig. Subgroup analysis by the type of prokinetic agents for all-cause mortality outcomes**

658 **S8 Fig. Sensitivity analysis of hospital length of stay outcomes**

659 **S9 Fig. Sensitivity analysis of ICU length of stay outcomes**

660 **S10 Fig. Sensitivity analysis of reported adverse event outcomes**

661 **S11 Fig. Sensitivity analysis of all-cause mortality outcomes**

Fig 1

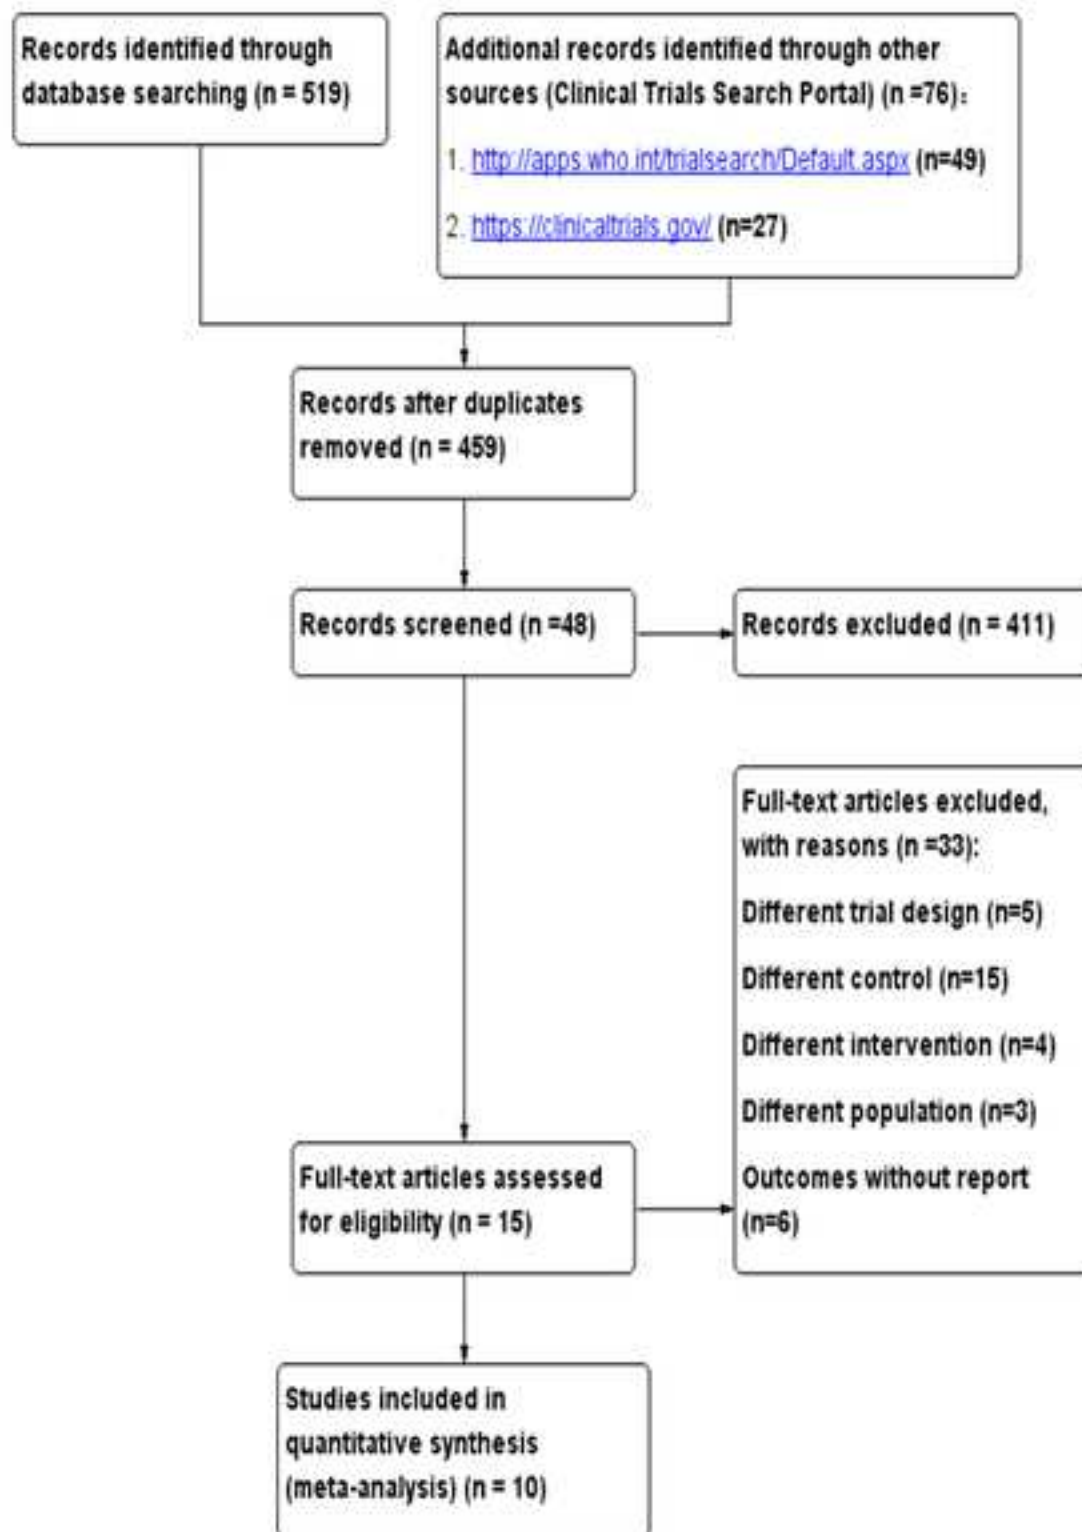

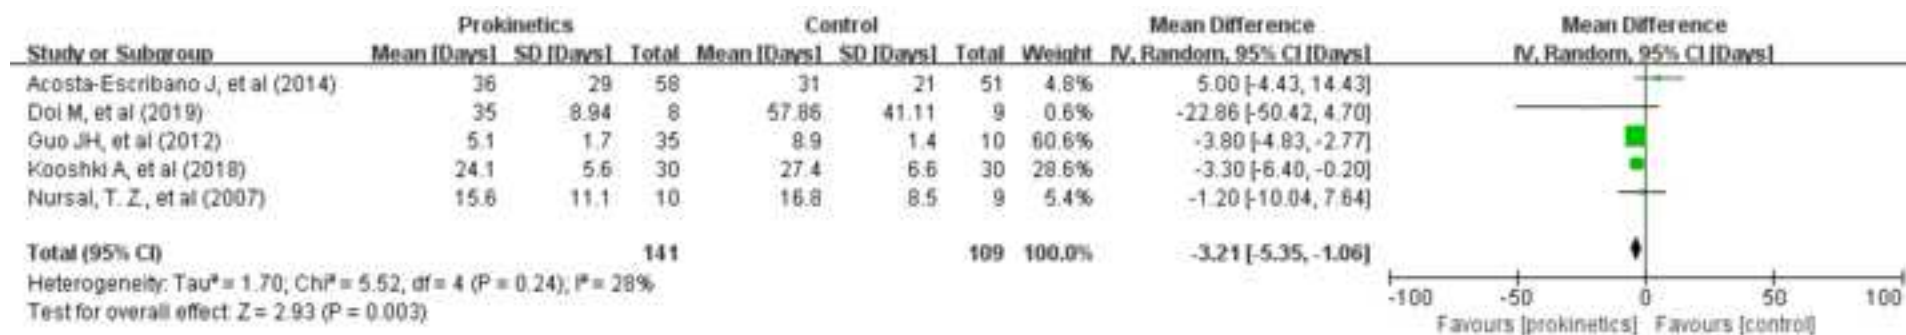



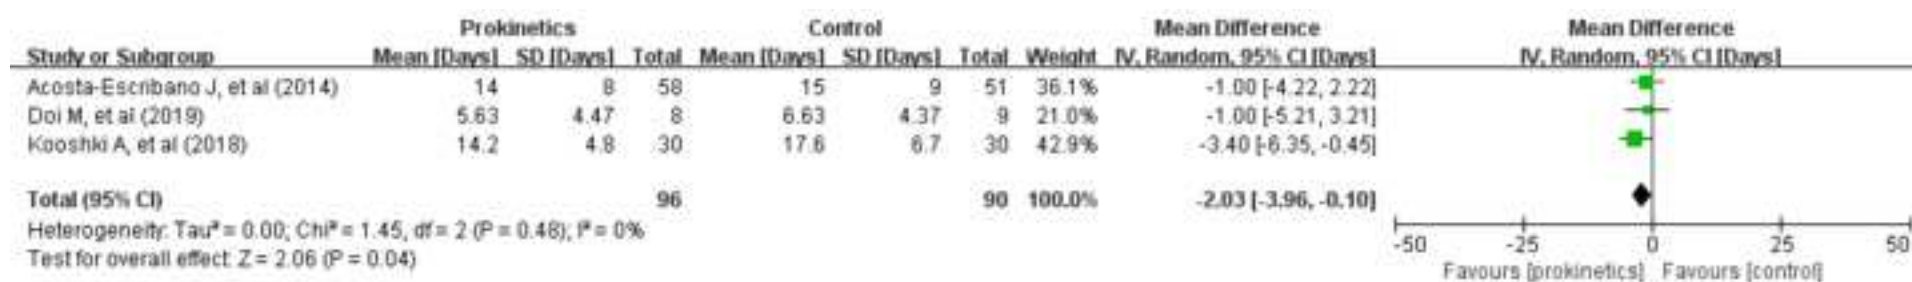

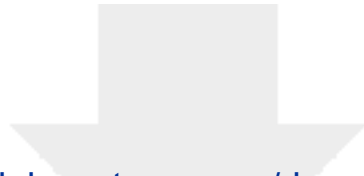

[Click here to access/download](#)

**Supporting Information**

Supplementary materials. 2020.06.13.docx

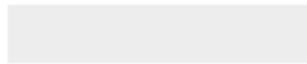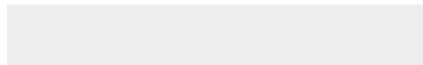

*The efficacy and safety of prokinetics in critically ill adults  
receiving gastric feeding tubes: ~~a~~A systematic review and  
meta-analysis*

Rong Peng<sup>1,2,3,4</sup>, Hailong Li<sup>1,2,3</sup>, Lijun Yang<sup>5</sup>, Linan Zeng<sup>1,2,3</sup>, Qiusha Yi<sup>1,2,3</sup>, Peipei Xu<sup>1,2,3</sup>,  
Xiangcheng Pan<sup>1,2,3</sup>, Lingli Zhang<sup>1,2,3\*</sup>

<sup>1</sup> Department of Pharmacy, West China Second University Hospital, Sichuan University, Chengdu, Sichuan, China

<sup>2</sup> Evidence-Based Pharmacy Center, West China Second University Hospital, Sichuan University, Chengdu, Sichuan, China

<sup>3</sup> Key Laboratory of Birth Defects and Related Diseases of Women and Children (Sichuan University), Ministry of Education, Chengdu, Sichuan, China

<sup>4</sup> Department of Clinical Nutrition, Affiliated Hospital of Chengdu University, Chengdu, Sichuan, China

<sup>5</sup> Department of General Practice Medicine, Affiliated Hospital of Chengdu University, Chengdu, Sichuan, China

\*Corresponding Author: Lingli Zhang, Department of Pharmacy, West China Second University Hospital, Sichuan University. Renming Road, Chengdu, Sichuan, 610041, China. Tel: 0862885502378

E-mail: [zhanglingli@scu.edu.cn](mailto:zhanglingli@scu.edu.cn)

# 1 Abstract

2 **Background:** Intolerance to gastric feeding tubes is common ~~in~~among critically ill adults and may  
3 increase morbidity. Administration of prokinetics in the ICU is common. However, the efficacy and  
4 safety of prokinetics are unclear in critically ill adults with gastric feeding tubes. We conducted a  
5 systematic review to determine the efficacy and safety of prokinetics for improving gastric feeding  
6 tube tolerance in critically ill adults.

7 **Methods:** Randomized controlled trials (RCTs) were identified by systematically searching the  
8 Medline, Cochrane and Embase databases. Two independent reviewers extracted ~~the~~ relevant data and  
9 assessed the quality of the studies. We calculated pooled relative risks (RRs) for dichotomous  
10 outcomes and the mean differences (MDs) for continuous outcomes, with the corresponding 95%  
11 confidence intervals (CIs). We assessed the risk of bias using the Cochrane risk-of-bias tool and used  
12 the Grading of Recommendations Assessment, Development, and Evaluation (GRADE) methodology  
13 to rate the quality of the evidence.

14 **Results:** Fifteen RCTs met the inclusion criteria. A total of 10 RCTs involving 846 participants were  
15 eligible for the quantitative analysis. ~~A majority of~~Most studies (10 of 13, 76.92%) found that  
16 prokinetics showed beneficial effects on feeding intolerance in critically ill  
17 adults receiving gastric feeding, prokinetic agents may reduce the ICU length of stay (MD -2.03, 95%  
18 CI -3.96, -0.10; P = 0.04; low certainty) and the hospital length of stay (MD -3.21, 95% CI -5.35, -1.06;  
19 P = 0.003; low certainty). However, prokinetics failed to improve the outcomes of reported adverse  
20 events, and all-cause mortality.

21 **Conclusion:** As a class of drugs, prokinetics may improve tolerance to gastric feeding to some extent  
22 in critically ill adults. However, ~~there is low degree of~~the certainty ~~in~~of the evidence suggesting that  
23 prokinetics reduce the ICU or hospital length of stay is low. Prokinetics did not significantly decrease  
24 the risks of reported adverse events or all-cause mortality ~~in~~among critically ill adults.

25 **Keywords:** Prokinetics; Critical illness; Gastroparesis; Enteral nutrition; Systematic review.

## 26 **Introduction**

27 Critical illness is usually associated with catabolic stress and increases the incidence of infection and  
28 multiple organ dysfunction, bringing disproportionately high mortality. A systematic review found a  
29 strikingly high prevalence of malnutrition in intensive care unit (ICU) patients (ranging from 38% to  
30 78%) [1]. Owing to the benefits of nutrition support in reducing disease severity and favorably  
31 impacting patient outcomes, early nutrition support therapy, primarily by the enteral route, is seen as a  
32 proactive therapeutic strategy [2]. In addition, if oral intake is not possible, tube feeding through  
33 gastric access has been recommended as the standard approach to initiate enteral nutrition in adult  
34 critically ill patients [3], as gastric feeding provides greater nutritional and non-nutritional benefits  
35 than parenteral nutrition and is more likely to improve the prognosis [4]. Furthermore, gastric feeding  
36 is more physiological than postpyloric feeding and does not require a higher level of technology [3].

37 However, enteral tube feeding intolerance occurs frequently in critically ill patients. Blaser et al.  
38 reported that the pooled proportion of feeding intolerance was 38.3% (95% confidence interval (CI)  
39 30.7–46.2%) [5]. Feeding intolerance was first described by the Working Group on Abdominal  
40 Problems of the European Society of Intensive Care Medicine as failure to provide adequate enteral  
41 nutrition to critically ill patients for clinical reasons (vomiting, high gastric residual volume (GRV),  
42 diarrhea, gastrointestinal bleeding, presence of entero-cutaneous fistulas, etc.); if a feeding rate of at  
43 least 20 kcal/kg body weight (BW)/day cannot be reached via the enteral route in 72 h of feeding  
44 attempts or if enteral feeding must be stopped for any clinical reason, feeding intolerance should be  
45 considered present [6]. However, feeding intolerance is inconsistently defined in different studies, with  
46 the definitions falling into three main categories: (1) “large” GRV; (2) presence of gastrointestinal  
47 symptoms; or 3) inadequate delivery of enteral nutrition [5]. Feeding intolerance is associated with  
48 increasing mortality, and seven-day feeding intolerance is an independent predictor of 60-day  
49 mortality [7]. In addition, a meta-analysis by the European Society for Clinical Nutrition and  
50 Metabolism showed that gastric feeding intolerance was more prevalent than postpyloric feeding

51 intolerance (25.7% vs. 3.5%,  $p=0.0005$ ) [3]. Given the risk associated with gastric feeding intolerance,  
52 it should be treated aggressively.

53 There are three methods for the treatment of gastric feeding intolerance. First, there is the most widely  
54 used method, the administration of prokinetics. Among recipients of gastric feeding, 13% had been  
55 prescribed prokinetics preemptively before they developed intolerance. Approximately one-third of  
56 patients who developed feeding intolerance were treated with a prokinetic agent during their stay in  
57 the ICU. Second, after the development of intolerance, 17% of patients received supplemental  
58 parenteral nutrition. Third, only 7.5% of patients with gastric feeding intolerance subsequently  
59 received enteral nutrition via a postpyloric feeding tube [8]. Although the use of prokinetics in the ICU  
60 is common, the recommendations vary from one authority to another. For example, the ESPEN  
61 guidelines on clinical nutrition in the ICU [3] suggest that intravenous erythromycin should be used as  
62 a first-line prokinetic therapy in critically ill patients with gastric feeding intolerance (grade of  
63 recommendation: B – strong consensus, 100% agreement). Alternatively, intravenous metoclopramide  
64 or a combination of metoclopramide and erythromycin can be used as a prokinetic therapy (Grade of  
65 recommendation: 0 – strong consensus, 100% agreement). However, the ASPEN/SCCM guidelines  
66 weakly recommend the use of gastrointestinal motility agents in the case of feeding intolerance (low  
67 quality of evidence) [2]. The Canadian Critical Care Clinical Practice guidelines recommend  
68 metoclopramide as the first-line prokinetic agent in the ICU [9]. However, in Chinese guidelines,  
69 herbal or natural medicines that enhance gastric motility are recommended for patients receiving  
70 gastric feeding tubes [10]. There is little agreement on how to use prokinetics for gastric feeding  
71 intolerance in critically ill patients. One of the reasons for the different recommendations may be that  
72 the definition of feeding intolerance has changed over time, especially regarding the index of high  
73 GRV. Some studies have suggested that measurement of GRV provides no benefit and should no  
74 longer be recommended. However, GRV is also an indicator of feeding intolerance in many ICUs,  
75 especially in patients with a high risk of aspiration and aspiration pneumonia. Therefore, the Chinese  
76 guidelines call for caution in abandoning monitoring of GRV in some high-risk patients [10]. If GRV

77 is measured, a volume of less than 500 mL should not result in an interruption of feeding unless there  
78 are other signs of intolerance, such as nausea, vomiting, abdominal pain, abdominal distension, or  
79 deterioration in hemodynamics or overall status [11]. A GRV of 500 ~~mL~~ is the recommended  
80 threshold for a diagnosis of enteral feeding intolerance in US and European critical care and nutrition  
81 society guidelines [2, 3, 12]. Although the updated European Society for Clinical Nutrition and  
82 Metabolism (ESPEN) guidelines [3], published in 2019, provide the latest information on enteral  
83 nutrition (EN) and parenteral nutrition (PN) in critically ill adult patients, we find that some aspects of  
84 the efficacy and safety of prokinetics in critically ill patients are still quite unclear [13], and it is  
85 necessary to find new evidence to address these uncertainties.

86 On this topic, a previous meta-analysis by Lewis, K. et al. [14] examined the effects of prokinetics on  
87 feeding intolerance or high GRV and clinical outcomes. However, Lewis, K. et al. [14] defined  
88 feeding intolerance as GRV  $\geq 150$  ~~mL~~, vomiting, or abdominal distention resulting in feeding  
89 interruption. This definition may be considered obsolete [15]. Some new evidence has ~~come to~~  
90 ~~light~~~~emerged~~ on this topic; ~~taking-considering~~ recent evidence ~~into consideration~~, we conducted this  
91 systematic review to determine the efficacy and safety of prokinetics for intolerance of gastric feeding  
92 in critically ill adult patients.

## 93 **Methods**

94 This systematic review and meta-analysis was conducted according to the Cochrane Handbook for  
95 Systematic Reviews of Interventions (version 5.1.0) [16], and the reporting of our study was based on  
96 the Preferred Reporting Items for Systematic Reviews and Meta-analyses (PRISMA) statement [17].

97 ~~The review protocol is available on PROSPERO, registration number CRD42020157446. The review~~  
98 ~~protocol has been submitted to PROSPERO (ID 157446), b. But the review is still ongoing.~~  
99 ~~<https://www.crd.york.ac.uk/prospero/#recordDetails>.~~

100 Neither patients who received gastric feeding in the ICU nor their families were involved in defining  
101 the research question or the outcome measures, but they were intimately involved in the design,

102 giving our team a wealth of good advice regarding design ideas.

## 103 **Search strategytrials**

104 We searched the Medline and Embase databases as well as the Cochrane Central Register of  
105 Controlled Trials (CENTRAL) from their inception dates to November 22, 2019. We combined  
106 Medical Subject Headings (MeSH) and free text terms to identify relevant articles. An information  
107 expert (XY) developed our search strategies.

108 We also searched clinicaltrials.gov (<https://clinicaltrials.gov/>) and the WHO ICTRP  
109 (<http://apps.who.int/trialsearch/>) for additional information, using the terms “critically ill patients”, and  
110 limited our search to studies labeled “completed” AND “Interventional studies (clinical trials)” in  
111 which summary results were available to identify additional eligible studies. There were no language  
112 restrictions. Additionally, we used a manual search strategy to retrieve the relevant articles referred to  
113 by the retrieved publications (the search strategies are reported in **S1 Table**).

## 114 **Inclusion criteria**

115 Trials were selected based on the following inclusion criteria: (1) the study was designed as a  
116 randomized controlled trial (RCT) comparing prokinetic treatments with ~~the a~~ control group; (2) the  
117 population included critically ill adult patients aged  $\geq 18$  years who were admitted to the ICU and  
118 received gastric feeding tube, ~~s~~ regardless of whether they had pre-existing feeding intolerance; (3) the  
119 intervention group received metoclopramide, erythromycin, or other prokinetic agents, such as herbal  
120 medicine or natural medicines with the function of enhancing gastric motility, regardless of the dose,  
121 frequency, duration or combination of prokinetics; (4) the control group received no intervention or a  
122 placebo; (5) if the gastric feeding patients with feeding intolerance had a GRV  $\geq 500$  mL and/or  
123 symptoms of nausea, vomiting, abdominal distention, regurgitation, deterioration in hemodynamics or  
124 other symptoms resulting in feeding interruption, ~~and if they~~ failed to respond to interventions, ~~then,~~



125 regardless of whether they were in the control group or the prokinetics group, they were switched to  
126 postpyloric feeding or had gastric feeding withheld for 4-6 h [2, 3]; and (6) the outcomes included any  
127 of the following: all-cause mortality; Acute Physiology and Chronic Health Evaluation II  
128 (APACHE II) or Simplified Acute Physiology Score II; sepsis; use of an artificial airway; pneumonia;  
129 hospital or ICU length of stay; patient nutritional status (malnutrition); gastrointestinal symptoms;  
130 GRV; feeding intolerance; or ~~the~~ side effects of the prokinetics, such as cardiovascular disorders,  
131 bronchospasm, extrapyramidal symptoms, abdominal cramps, allergic reactions and pancreas  
132 disorders. The exclusion criteria were as follows: (1) the studies had no control group; (2) the studies  
133 had no prokinetic treatment group; (3) patients were considered to have feeding intolerance if tube  
134 feeding was electively not prescribed or was stopped/interrupted for procedural reasons; (4) the studies  
135 discontinued or interrupted the gastric feeding prematurely when the GRV was less than 500 mL or the  
136 patients did not have any signs of intolerance, such as nausea, vomiting, abdominal pain, abdominal  
137 distension, or deterioration in hemodynamics or overall status.

138 For our purposes, gastric feeding intolerance was defined as a “large” GRV ( $\geq 500$  mL), the  
139 presence of gastrointestinal symptoms (vomiting, diarrhea, gastrointestinal bleeding, ~~the~~ presence of  
140 enterocutaneous fistulas), or inadequate delivery of EN (the energy provided by EN was less than 20  
141 kcal/kg BW/day after 72 h of feeding attempts or less than 60% of the EN target at the fifth day) in  
142 critically ill adults receiving gastric feeding tubes. Preventive usage of prokinetics meant that  
143 prokinetics were prescribed preemptively on the day EN was initiated and before patients presented a  
144 GRV  $>150$  mL or symptoms of feeding intolerance. Preventive usage of prokinetics for risk meant  
145 that prokinetics were used in patients with GRVs between 150 and 500 mL but before the development  
146 of intolerance. Therapeutic usage of prokinetics meant that the prokinetics were administered in  
147 patients who had developed feeding intolerance.

148 A reported adverse event was defined as any untoward medical occurrence or unfavorable and  
149 unintended sign, including an abnormal laboratory finding, symptom, or disease (new or exacerbated),  
150 temporally associated with the use of the study medication. The reported adverse events included

151 abnormal laboratory test results (hematology, clinical chemistry, or urinalysis) or other safety  
152 assessments (e.g., ECGs, radiological scans, or measurements of vital signs), including those that  
153 worsened from baseline and were deemed clinically significant in the medical and scientific judgment  
154 of the investigator; exacerbation of a chronic or intermittent preexisting condition, including an  
155 increase in the frequency and/or intensity of the condition; new conditions detected or diagnosed after  
156 the administration of study medication even if they may have been present prior to the start of the  
157 study; and/or signs, symptoms, or clinical sequelae of a suspected interaction, such as diarrhea,  
158 nosocomial pneumonia, severe sepsis, brain herniation, cardiac arrest, or changes in the  
159 electrocardiographic QTc interval.

## 160 **Risk-of-bias assessments**

161 The methodological quality for the included RCTs was assessed independently by 2 researchers (RP,  
162 HLL) based on the Cochrane risk-of-bias criteria [16]. The seven items used to evaluate bias in each  
163 trial included randomization sequence generation, allocation concealment, blinding of participants and  
164 personnel, blinding of outcome assessment, incomplete outcome data, selective reporting, and other  
165 bias. We defined other bias as being present in the trials where baseline characteristics were not  
166 similar between different intervention groups. The included trials were graded as low quality, high  
167 quality, or unclear risk based on the following criteria: (1) trials were considered low quality if either  
168 randomization or allocation concealment was assessed as having a high risk of bias, regardless of the  
169 risk of other items; (2) trials were considered high quality when both randomization and allocation  
170 concealment were assessed as having a low risk of bias and all other items were assessed as having a  
171 low or unclear risk of bias; (3) trials were considered to have unclear risk if they did not meet the  
172 criteria for high or low risk.

## 173 **Data extraction**

174 Two researchers (RP, HLL) independently extracted the following information from each eligible

175 RCT: (1) general study characteristics: author name, year of publication, numbers of treatment groups  
176 and patients, trial registry number, methods for measuring gastric emptying or GRV, and the definition  
177 of feeding intolerance; (2) patient characteristics: sex, age, baseline patient information (presence or  
178 absence of pre-existing feeding intolerance, APACHE II score and nutritional status, if reported); (3)  
179 primary diseases (the medical, surgical, or neurosurgical conditions of the critically ill patients); (4)  
180 interventions: details of the prokinetic treatment group and control group (e.g., dose, frequency,  
181 duration and combination of prokinetics for treatment); and (5) ~~the~~ outcomes: gastrointestinal  
182 symptoms, ~~and~~ feeding tolerance, the number of participants with all-cause death, the ICU length of  
183 stay, the hospital length of stay, and the number of reported adverse events.

184 If the trials had more than 2 groups or used factorial designs and could be analyzed using multiple  
185 comparisons, we extracted only the information and data of interest reported in the original articles. If  
186 a trial had multiple reports, we collated all data into one study. If a trial had both reports from  
187 ClinicalTrials.gov and journal publications, we carefully checked data from these two sources for  
188 consistency. If outcome data were reported at multiple follow-up points, we used data from the longest  
189 follow-up.

## 190 **Statistical analysis**

191 The effect of prokinetics on gastrointestinal symptoms and feeding tolerance, main clinical outcomes  
192 of all-cause mortality, ICU length of stay, hospital length of stay, and reported adverse events were  
193 analyzed. We recorded data on the number of participants with each outcome event by allocated group  
194 and recorded the number of participants with compliance and the participant, who was later thought to  
195 be eligible or otherwise excluded from treatment or follow-up. Intention-to-treat (ITT) analysis was  
196 conducted. ITT analysis is a comparison of the treatment groups that include all patients as originally  
197 allocated after randomization regardless of whether treatment was initiated or completed [18]. The  
198 CONSORT (Consolidated Standards of Reporting Trials) recommends ITT analysis as standard  
199 practice [19].

200 We performed a meta-analysis to calculate relative risks (RRs) or absolute risk differences (ARDs) in  
201 dichotomous data and mean differences (MDs) in continuous data, 95% CIs using the Mantel-  
202 Haenszel method and the inverse variance statistical method, respectively. If sufficient data were not  
203 available in the published reports or the abstract of the conference, we contacted the authors of the  
204 paper. If the raw data were not the mean and standard deviation, the sample mean and standard  
205 deviation were estimated from the sample size, median, range and/or interquartile range [20, 21].

206 We tested for heterogeneity between trial results using a standard Chi<sup>2</sup> test, and statistical  
207 heterogeneity between summary data was evaluated using the I<sup>2</sup> statistic. Sensitivity analysis was  
208 performed by excluding low-quality studies, trials recruiting participants with particular conditions, or  
209 trials with characteristics different from the others. When an inconsistency was detected between the  
210 RR and ARD for the same outcome, we explained the results based on the RR because the RR model  
211 is more consistent than ARD, particularly for an intervention aimed at preventing an undesirable event  
212 [16, 22].

213 In our meta-analysis, a random-effects model was used. The defining feature of the random-effects  
214 model is that there is a distribution of true effect sizes, and there are two sources of variance, within-  
215 study error variance and between-study variance [23]. However, if the number of studies is very small,  
216 the statistical power will have poor precision due to the variance between studies. Although the  
217 random-effects model is still the appropriate model, the information to apply it correctly is not  
218 available. In this case, we will add the separate effects to our manuscript. If heterogeneity was  
219 identified (I<sup>2</sup> >40% [16]) and ~~there were~~ sufficient trials were included in the review, we planned to  
220 investigate heterogeneity in the specified subgroups based on types of prokinetics (erythromycin,  
221 metoclopramide or other prokinetics), combination of prokinetics (yes or no), and feeding intolerance  
222 history (participants with or without pre-existing feeding intolerance before the start of the trial).  
223 Analysis was performed to assess whether the difference between the subgroups was statistically  
224 significant.

225 We assessed publication bias by examining funnel plots when the number of trials reporting the  
226 primary outcomes was 10 or more. However, if the number of included studies is less than 10 for a  
227 given main outcome, the funnel plot may not reliably detect evidence of departure bias. A prototypical  
228 situation that should elicit suspicion of publication bias ~~occurs~~ when evidence ~~is derived~~ ~~come~~ from  
229 ~~a~~ small number of studies or small sample size~~s~~ and all outcomes favored the intervention [24]. All  
230 meta-analyses were performed using RevMan version 5.3 (Cochrane Collaboration). All tests were 2-  
231 tailed, and  $P < 0.05$  was considered statistically significant.

232 We used the Grading of Recommendations Assessment, Development, and Evaluation (GRADE)  
233 methodology to rate the certainty of evidence as high, moderate, low, or very low. RCTs begin as  
234 high-certainty evidence but can be downgraded because of risk of bias, imprecision, inconsistency,  
235 indirectness, or publication bias. If the limitation of the evidence was considered ~~as~~ serious, the  
236 evidence was downgraded by one level; if the limitation was considered very serious, the evidence  
237 was downgraded by two levels [25].

## 238 Results

239 Our initial search identified a total of 595 citations. After deduplication, 459 publications remained.  
240 The titles and abstracts of those records were screened for inclusion, and 48 reports proved potentially  
241 eligible. After full-text screening, fifteen trials met the inclusion criteria [26-40]. ~~There were five~~ Five  
242 studies ~~that~~ did not provide useful data for quantitative synthesis (meta-analysis) [36-40]. Ultimately,  
243 10 trials were included in the quantitative analysis [26-35]. A total of 846 patients were enrolled in 10  
244 RCTs, ~~that~~ included a variety of critically ill patients with medical, surgical, and neurosurgical  
245 conditions. The details of the eligible trials are presented in **Fig 1**. ~~Reasons for excluding~~ Sstudies  
246 ~~included that the study~~ were excluded if they had a different trial design [41-45], ~~the study had~~ a  
247 different intervention or a different control [46-64], ~~or~~ the study had a different population [65-67];  
248 or ~~the study~~ had been registered with the Clinical Trials Registry Platform (clinicaltrials.gov or WHO

249 ICTRP) and had been labeled “completed”; but outcomes ~~did~~were not reported [68-73] (S2 Table).

250 **Fig 1. Literature Search and Screening Process.**

251 The 15 eligible studies reported 10 prokinetics, including metoclopramide, erythromycin, cisapride,  
252 GSK962040, mosapride and herbal medicine or natural medicines with the function of enhancing  
253 gastric motility (Chenxia Sijunzi decoction, ginger, fenugreek seed powder, gastrolit (*Zataria*  
254 *multiflora*), rikkunshito), respectively. Based on the outcomes measured, the studies were subdivided  
255 into those investigating effects on gastrointestinal symptoms, ~~and~~ feeding tolerance studies, and  
256 clinical outcome studies: hospital length of stay, ICU length of stay, reported adverse events, and all-  
257 cause mortality. The details of the eligible studies are presented in **Table 1**.

**Table 1. Characteristics of the Included Trials and Participants**

| Included Trials                                       | Population                                                                                                                                                                      | Treatment #                                                                            | Main outcomes                                                                                                                                            | Definition of feeding intolerance †     | <del>When begin to use of</del><br><del>P</del> rokinetics <u>initiation</u><br><u>timing</u> * |
|-------------------------------------------------------|---------------------------------------------------------------------------------------------------------------------------------------------------------------------------------|----------------------------------------------------------------------------------------|----------------------------------------------------------------------------------------------------------------------------------------------------------|-----------------------------------------|-------------------------------------------------------------------------------------------------|
| Yavagal et al<br>2000 (India) [35]                    | ICU patients required placement of a nasogastric tube for >24 hrs. Mean age: 36.22 years, 61.97-% male. Mean APACHE II score: 17.54.                                            | 1) Metoclopramide 10 mg NG q8h;<br>2) Placebo.                                         | 1) Nosocomial pneumonia;<br>2) Mortality.                                                                                                                | NA                                      | Preventive usage                                                                                |
| Sustic et al 2005<br>(Croatia) [39] ¶                 | Patients treated at a <u>a</u> cardiosurgical ICU after CABG surgery, enteral feeding by nasogastric tube. Mean age: 59.5 years, 77.5-% male. Mean SAPS II score: 21.           | 1) Metoclopramide 10 mg i.v.;<br>2) Control group.                                     | 1) t <sub>+15</sub> , t <sub>+30</sub> , t <sub>+60</sub> , t <sub>+120</sub> ;<br>2) AUC <sub>120</sub> ;<br>3) C <sub>max</sub> .                      | NA                                      | Preventive usage                                                                                |
| Nursal et al 2007<br>(Turkey) [32]                    | Traumatic brain injury patients with Glasgow Coma Scores of 3–11. <u>e</u> nteral feeding by nasogastric tube. Mean age: 43.42 years, 84.2-% male. Mean APACHE II score: 12.87. | 1) Metoclopramide 10 mg i.v. q8h×5 days;<br>2) Control group, saline                   | 1) Feeding intolerance;<br>2) Feeding complications;<br>3) AUC <sub>60</sub> ;<br>4) C <sub>max</sub> ;<br>5) Length of hospital stays;<br>6) Mortality. | Gastrointestinal symptoms (without GRV) | Preventive usage                                                                                |
| Nassaji et al 2010<br>(Islamic Republic of Iran) [31] | Surgical ICU with <u>a</u> nasogastric tube for more than 24 hours. Mean age: 44.88 years, 65.45-% male. Mean APACHE II score: <del>N</del> ot reported.                        | 1) Metoclopramide 10 mg NG q8h;<br>2) Control patients did not receive metoclopramide. | 1) Nosocomial pneumonia;<br>2) Mortality.                                                                                                                | NA                                      | Preventive usage                                                                                |

|                                          |                                                                                                                                                                                                                                                                                                                            |                                                                                        |                                                                                                                                                                                                                                      |                                                                     |                   |
|------------------------------------------|----------------------------------------------------------------------------------------------------------------------------------------------------------------------------------------------------------------------------------------------------------------------------------------------------------------------------|----------------------------------------------------------------------------------------|--------------------------------------------------------------------------------------------------------------------------------------------------------------------------------------------------------------------------------------|---------------------------------------------------------------------|-------------------|
| Acosta-Escribano et al 2014 (Spain) [26] | Adult neuro-critical patients, Glasgow Coma Scores of 14 <del>to</del> 9 points, with ventilation indications <del>s_mechanics</del> at admission and <del>the</del> need for <del>nutrition</del> artificial enteral <del>nutrition</del> . Mean age: 54.53 years, 65.14 <del>%%</del> male. Mean APACHE II score: 18.53. | 1) Metoclopramide 10 mg;<br>2) Placebo.                                                | 1) Gastrointestinal complications;<br>2) Gastric residue;<br>3) Mechanical ventilation-associated pneumonia;<br>4) The duration of mechanical ventilation;<br>5) Length of ICU stay;<br>6) Length of hospital stay;<br>7) Mortality. | Large GRV alone (>500 <del>mmL</del> in two consecutive episodes)   | Preventive usage  |
| Rajan et al 2017 (India) [38] ¶          | Critically ill <del>cirrhoticscirrhotic</del> patients in <del>La</del> liver ICU with feeding intolerance.                                                                                                                                                                                                                | 1) Metoclopramide i.v.,<br>2) Erythromycin i.v.,<br>3) Placebo.                        | 1) Mortality;<br>2) GRV.                                                                                                                                                                                                             | Gastrointestinal symptoms including large GRV (500 <del>mmL</del> ) | Therapeutic usage |
| Ritz et al 2005 (Australia) [33]         | Mixed medical/surgical intensive care unit patients with mechanically <del>ventilat</del> ventilated. Mean age: 47.49 years, 60.9 <del>%%</del> male. Mean APACHE II score: 19.                                                                                                                                            | 1) <b>Erythromycin 70 mg;</b><br>2) Erythromycin 200 mg;<br>3) Placebo, saline (0.9%). | 1) Gastric emptying coefficient;<br>2) Gastric half-emptying time (t <sub>1/2</sub> ).                                                                                                                                               | NA                                                                  | Preventive usage  |
| Spapen et al 1995 (Belgium) [34]         | Adult medical/surgical intensive care unit patients, requiring prolonged mechanical ventilation and enteral feeding. Mean age: 71.10 years, 52.38 <del>%%</del> male. Mean APACHE II score: not reported.                                                                                                                  | 1) Cisapride 10 mg q6h;<br>2) No treatment.                                            | 1) Gastric residue;<br>2) The mean time at which 50% of the technetium 99m-labeled test meal was eliminated from the stomach (T <sub>1/2</sub> );<br>3) Mortality.                                                                   | NA                                                                  | Preventive usage  |



|                                                             |                                                                                                                                                           |                                                                                                                                                                                                                                                                                    |                                                                                                                                                                                                       |                                                                                              |                           |
|-------------------------------------------------------------|-----------------------------------------------------------------------------------------------------------------------------------------------------------|------------------------------------------------------------------------------------------------------------------------------------------------------------------------------------------------------------------------------------------------------------------------------------|-------------------------------------------------------------------------------------------------------------------------------------------------------------------------------------------------------|----------------------------------------------------------------------------------------------|---------------------------|
| Heyland et al<br>1996 (Canada)<br>[36] ¶                    | Mechanically ventilated patients in ICU of trauma and neurosurgery ICUs. Mean age: 53.9 years, 61% male. Mean SAPS score: 9.5.                            | 1) Cisapride 20 mg, NG;<br>2) An identical placebo.                                                                                                                                                                                                                                | 1) C <sub>max</sub> ;<br>2) AUC <sub>180</sub> .                                                                                                                                                      | NA                                                                                           | Preventive usage          |
| Chapman et al,<br>2016 (Australia)<br>[27]                  | Patients undergoing invasive mechanical ventilation in the ICU with nasogastric feeding. Mean age: 44.67 years, 83.33% male. Mean APACHE II score: 18.14. | 1) GSK962040 (50 mg);<br>2) GSK962040 (75 mg);<br>3) Placebo.                                                                                                                                                                                                                      | 1) Breath test gastric time to half emptying (BTt <sub>1/2</sub> );<br>2) Gastric emptying coefficient;<br>3) AUC <sub>240</sub> , AUC <sub>60</sub> ;<br>4) C <sub>max</sub> ;<br>5) Adverse events. | Large GRV alone (>200 mL) at least 6 hours after commencing liquid nutrition at ≥ 40 kcal/hr | Preventive usage for risk |
| Mokhtari et al<br>2009 (Islamic Republic of Iran)<br>[37] ¶ | Adult respiratory distress syndrome (ARDS) ICU patients.                                                                                                  | 1) Ginger,<br>2) Placebo.                                                                                                                                                                                                                                                          | 1) Feeding tolerated;<br>2) Ventilator-associated pneumonia;<br>3) ICU-free days;<br>4) Ventilator-free days;<br>5) Morality.                                                                         | Delayed gastric emptying is one of the major reasons for enteral feeding intolerance         | Preventive usage          |
| Guo JH, et al<br>2012 (China) [29]                          | Feeding with enteral nutrition in critically ill patients. Mean age: 59.49 years, 53.33% male. Mean APACHE II score: Not reported.                        | 1) Traditional Chinese medicine group: Chenxia Sijunzi decoction;<br>2) Western medicine group: mosapride dispersible tablets 5 mg and multienzyme tablets NG;<br>3) Control group: routine symptomatically treated without any medicines for promoting gastrointestinal function. | 1) The time of bowel sound recovery;<br>2) Gas passage time by anus;<br>3) The bowel movement time;<br>4) The Delays in the hospital.                                                                 | NA                                                                                           | Preventive usage          |

|                                         |                                                                                                                                                                                                                                     |                                                                                                              |                                                                                                                                                                                                                                  |                                                                                                                    |                  |
|-----------------------------------------|-------------------------------------------------------------------------------------------------------------------------------------------------------------------------------------------------------------------------------------|--------------------------------------------------------------------------------------------------------------|----------------------------------------------------------------------------------------------------------------------------------------------------------------------------------------------------------------------------------|--------------------------------------------------------------------------------------------------------------------|------------------|
| Kooshki et al<br>2018 (Iran) [30]       | Mechanically ventilated patients, enteral nutrition with nasogastric tube in two intensive care unit centers. Mean age: 56.95 years, 51.67% male. Mean APACHE II score: 23.2.                                                       | 1) Fenugreek seed powder 3_g q12h NG;<br>2) Routine care.                                                    | 1) Diarrhea;<br>2) Constipation;<br>3) GRV;<br>4) Respiratory aspiration;<br>5) Duration of mechanical ventilation;<br>6) Length of stay in <u>the</u> hospital;<br>7) Length of stay in <u>the</u> ICU;<br>8) Mortality.        | Gastrointestinal symptoms                                                                                          | Preventive usage |
| Tahershamsi et al<br>2018 (Iran) [40] ¶ | Mechanically ventilated patients hospitalized in ICU. Mean age: 63.06 years, 60.0-% male. Mean APACHE II score: No report.                                                                                                          | 1) Gastrolit ( <i>Zataria multiflora</i> ) (20 drops) q8h× 4 days;<br>2) Placebo = water.                    | 1) GRV.                                                                                                                                                                                                                          | NA                                                                                                                 | Preventive usage |
| Doi et al 2019<br>(Japan) [28]          | Critically ill adult patients requiring enteral nutrition by gastric tube for at least 5 days, and all patients were treated with invasive mechanical ventilation. Mean age: 72.84 years, 77.78% male. Mean APACHE II score: 22.82. | 1) <b>Rikkunshito 5 g</b> q8h × 5 days;<br>2) Rikkunshito 2.5 g q8h× 5 days;<br>3) No rikkunshito (control). | 1) GRV;<br>2) The percentage of the target enteral calorie intake achieved at the fifth day;<br>3) The plasma levels of ghrelin;<br>4) ICU length of stay;<br>5) Hospital length of stay;<br>6) Adverse events;<br>7) Mortality. | Inadequate enteral nutrition/ <u>failure to meet the -of the</u> enteral nutrition target at the fifth day (<60%)- | Preventive usage |

259 NG: nasogastric tube feeding; i.v.: intravenous injection; NA: not applicable; C<sub>max</sub>: P<sub>p</sub> peak paracetamol plasma levels; AUC: the area under the paracetamol concentration curve; t<sub>+15</sub>, t<sub>+30</sub>, t<sub>+60</sub>, t<sub>+120</sub>:  
260 P<sub>p</sub> plasma paracetamol concentration<sub>s</sub> at 15, 30, 60, and 120 minutes after administration of paracetamol and saline or metoclopramide in patients; SAPS, simplified acute physiology score; GRV,  
261 gastric residual volume<sub>s</sub>;

262 # If the trials had more than 2 groups or factorial designs and permitted multiple comparisons, the subgroup **with thein** bold font was extracted in this study.  
263 ¶ The study did not provide useful ~~data~~data for ~~M~~Meta-analysis.

## 264 **Risk of bias**

265 There was one trial at low risk of bias [27], and two studies were at high risk of bias [28, 31] due to  
266 inappropriate randomization and/or allocation concealment. For the remaining 12 studies, we were  
267 unable to comprehensively evaluate the risk of bias due to a lack of information [26, 29, 30, 32-40].  
268 (S1 Fig).

## 269 **Publication bias**

270 We checked the funnel plots of the main outcomes for asymmetry as planned; however, we included  
271 less than 10 RCTs in each main outcome, such that the funnel plots may not reliably detect evidence  
272 of departure bias.

## 273 **Main outcomes**

### 274 **Effect on gastrointestinal symptoms and feeding tolerance**

275 Thirteen studies ~~have~~ evaluated the effect of prokinetics on gastrointestinal symptoms and/or feeding  
276 tolerance in adult critically ill patients receiving gastric feeding [26-30, 32-34, 36-40].

277 The main results obtained are as follows: gastric emptying, GRV, diarrhea, constipation, feeding  
278 complications and feeding intolerance. Gastric emptying was measured by the drug model of  
279 acetaminophen absorption or the 13C-octanoic acid breath test with calculation on of the gastric  
280 emptying time, gastric emptying coefficient or area under the plasma concentration-time curve. **The**  
281 **various outcome definitions, especially for gastric tube tolerance, precluded quantitative synthesis of**  
282 **the data.**

283 **As a class of drugs, prokinetic agents appear to have positive effects on gastrointestinal function and**  
284 **improving feeding tolerance.** Ten of the thirteen studies reported ~~the~~ positive effects on improving  
285 gastric emptying and/or resolution of feeding intolerance in critically ill patients with the use of ~~by~~

286 using prokinetic agents. However, two studies suggested that metoclopramide had no effect on  
287 decreasing gastrointestinal complications in adult neurocritical patients or critical traumatic brain  
288 injury patients. One study reported that rikkunshito did not improve the achievement of enteral calorie  
289 targets in critically ill adults (**Table 2**).

290 **Table 2. Effects on gastrointestinal symptoms and feeding tolerance**

| Study                                          | Population (sample size)                                                    | Intervention                                                          | Outcome                                                                                                                                                                                 | P Value        | Conclusions                                                                                                                                 |
|------------------------------------------------|-----------------------------------------------------------------------------|-----------------------------------------------------------------------|-----------------------------------------------------------------------------------------------------------------------------------------------------------------------------------------|----------------|---------------------------------------------------------------------------------------------------------------------------------------------|
| Sustic et al<br>2005 (Croatia)<br>[39]         | Cardiosurgical patients after CABG surgery (40)                             | 1) Metoclopramide 10 mg i.v.;<br>2) Control group: saline.            | AUC <sub>120</sub> ; C <sub>max</sub> .<br>574±296; 8.51±2.2<br>429±309; 5.15±2.8                                                                                                       | 0.027; 0.007   | In CABG surgery patients with early enteral feeding, a single dose of intravenous metoclopramide effectively improves gastric emptying.     |
| Nursal et al<br>2007 (Turkey)<br>[32]          | Traumatic brain injury patients with Glasgow Coma Scale scores of 3–11 (19) | 1) Metoclopramide 10 mg i.v. q8h×5 days;<br>2) Control group: saline. | FI; feeding complications; AUC <sub>60</sub> at day 5; C <sub>max</sub> day 5;<br>4/10 (40%); 5/10 (50%);<br>589.6±457.8; 15.8±12.9<br>2/9 (22.2%); 3/9 (33.3%); 560±432.9;<br>12.0±9.9 | NS; NS; NS; NS | The results were unable to <del>document</del> reveal any advantage <del>to</del> of using metoclopramide in TBI patients.                  |
| Acosta-Escribano et al<br>2014 (Spain)<br>[26] | Adult neuro-critical patients, Glasgow Coma Scores of 14 <to 9 points (109) | 1) Metoclopramide 10 mg i.v.;<br>2) Placebo: saline.                  | Incidence of gastrointestinal complications; Incidence of GRV>500 mL at day 5;<br>29/58 (50%); 16/58 (28%)<br>22/51 (45%); 11/51 (22%)                                                  | NS; NS         | <del>The</del> Metoclopramide has no effect on decreasing <del>of the</del> gastrointestinal complications in adult neuro-critical patients |

|                                                 |                                                                                                                              |                                                                                                           |                                                                                                                                                                                                                          |                                   |                                                                                                                                                                                                                                                                                                                                                                                                                                                                                                                 |
|-------------------------------------------------|------------------------------------------------------------------------------------------------------------------------------|-----------------------------------------------------------------------------------------------------------|--------------------------------------------------------------------------------------------------------------------------------------------------------------------------------------------------------------------------|-----------------------------------|-----------------------------------------------------------------------------------------------------------------------------------------------------------------------------------------------------------------------------------------------------------------------------------------------------------------------------------------------------------------------------------------------------------------------------------------------------------------------------------------------------------------|
| <p>Rajan et al<br/>2017 (India)<br/>[38]</p>    | <p>Critically ill<br/><del>cirrhotic</del>cirrhotic<br/>patients in <del>La</del> liver<br/>intensive care unit<br/>(72)</p> | <p>1) Metoclopramide i.v.;<br/>2) Erythromycin i.v.;<br/>3) Placebo.</p>                                  | <p>Resolution of FI; Decrease in GRV<br/>beyond 24 hrs; the time to restart<br/>enteral nutrition (days)<br/>8.7%; no report; 2.61±0.72<br/>24%; no report; 2.20±0.91<br/><del>No</del> report; no report; 3.47±1.29</p> | <p>0.026; no report;<br/>0.03</p> | <p>Early detection and <del>the</del><br/>addition of prokinetics <del>helps</del><br/><del>in</del>facilitate <del>the</del> resolution of FI<br/>in critically ill cirrhotic<br/><del>patients</del>s. Erythromycin is safe<br/>and superior to<br/><del>M</del>metoclopramide for early<br/>resolution of gut paralysis in<br/>critically ill cirrhotic <del>patients</del>s.</p>                                                                                                                            |
| <p>Ritz et al 2005<br/>(Australia)<br/>[33]</p> | <p>Mixed<br/>medical/surgical<br/>intensive care unit<br/>patients (35)</p>                                                  | <p>1) <b>Erythromycin 70 mg i.v.;</b><br/>2) Erythromycin 200 mg i.v.;<br/>3) Placebo, saline (0.9%).</p> | <p>Gastric emptying coefficient; gastric<br/>half-emptying time (t<sub>1/2</sub>)<br/>3.8_(3.3-4.0);_98 (88-112) min<br/>4.0_(3.6-4.2);_86_(75-104) min<br/>2.9_(2.5-3.7);_122_(102-190) min</p>                         | <p>&lt;0.05;_&lt;0.05</p>         | <p>Treatment with 70 and 200 mg<br/><del>of</del> intravenous erythromycin<br/><del>are</del>is equally effective in<br/>accelerating gastric emptying<br/>in <del>the</del> critically ill <del>patients</del>.<br/>Doses as low as 70 mg<br/>(approx. 1 mg/kg) accelerate<br/>gastric emptying in <del>the</del><br/>critically ill <del>patients</del>,<br/>improving the success of<br/>enteral feeding. This effect is<br/><del>seen</del>observed only in patients<br/>with delayed gastric emptying.</p> |

|                                                              |                                                                                                                          |                                                                            |                                                                                                                                                                                                                                   |                         |                                                                                                                                                                            |
|--------------------------------------------------------------|--------------------------------------------------------------------------------------------------------------------------|----------------------------------------------------------------------------|-----------------------------------------------------------------------------------------------------------------------------------------------------------------------------------------------------------------------------------|-------------------------|----------------------------------------------------------------------------------------------------------------------------------------------------------------------------|
| Spapen et al<br>1995<br>(Belgium) [34]                       | Adult<br>medical/surgical<br>intensive care unit<br>patients (21)                                                        | 1) Cisapride 10 mg q6h NG;<br>2) No treatment.                             | Gastric residue over one-week;<br>gastric emptying time $T_{1/2}$ ;<br>$17.7 \pm 8.9$ min;<br>$18 \pm 7$ min<br>$94.5 \pm 33.3$ mL;<br>$78 \pm 40$ min                                                                            | <0.001; <0.005          | Gastric emptying in critically ill, sedated, and mechanically ventilated patients can be significantly improved by adding cisapride to a routine enteral feeding protocol. |
| Heyland et al<br>1996 (Canada)<br>[36]                       | Mixed intensive care<br>unit patients (72)                                                                               | 1) Cisapride 20 mg;<br>2) An identical placebo.                            | <del>The Differences</del> (Day 2 - Day 1)<br><del>of</del> $\Delta C_{max}$ ; $\Delta t_{max}$ ; $\Delta AUC_{180}$<br>$49.1 \pm 10.7$ ; $-40.8 \pm 12.0$ ; $5534 \pm 1349$<br>$12.3 \pm 7.0$ ; $-4.2 \pm 10.4$ ; $2832 \pm 769$ | 0.005; 0.02; 0.09       | Cisapride enhances gastric emptying in critically ill patients                                                                                                             |
| Chapman et al,<br>2016<br>(Australia)<br>[27]                | Mixed intensive care<br>unit patients (33)                                                                               | <b>1) GSK962040 (50 mg) NG;</b><br>2) GSK962040 (75 mg) NG;<br>3) Placebo. | Baseline vs. post gastric emptying<br>time $BT_{1/2}$ ; $AUC_{240}$<br>$0.65$ (0.39,0.1.08); $2.50$ (1.68,3.72)<br>$1.85$ (0.82,4.15); $0.72$ (0.39,1.36)<br>$1.21$ (0.68,2.15); $1.33$ (0.85,2.06)                               | No report; no<br>report | A single enteral dose of camicinal (50 mg), but not 75 mg, accelerates gastric emptying and increases glucose absorption in feed-intolerant critically ill patients.       |
| Mokhtari et al<br>2009 (Islamic<br>Republic of<br>Iran) [37] | <del>Critically ill</del> Adult<br>respiratory distress<br>syndrome (ARDS)<br><del>critically ill</del> patients<br>(32) | 1) Ginger NG,<br>2) Placebo.                                               | Feeding tolerated in the first 48 hrs;<br>feeding tolerated during the entire<br>study period<br>$51\%$ ; $92\%$<br>$57\%$ ; $93\%$                                                                                               | <0.005; 0.42            | Supplementing the diet with ginger extract in ARDS patients reduces the delayed gastric emptying risk.                                                                     |



|                                                |                                                    |                                                                                                                                                                                                                                                                                                                                                                                               |                                                                                                                                                                                                                                                                                                                                                                                        |                                  |                                                                                                                                                                                                                                                                                                                               |
|------------------------------------------------|----------------------------------------------------|-----------------------------------------------------------------------------------------------------------------------------------------------------------------------------------------------------------------------------------------------------------------------------------------------------------------------------------------------------------------------------------------------|----------------------------------------------------------------------------------------------------------------------------------------------------------------------------------------------------------------------------------------------------------------------------------------------------------------------------------------------------------------------------------------|----------------------------------|-------------------------------------------------------------------------------------------------------------------------------------------------------------------------------------------------------------------------------------------------------------------------------------------------------------------------------|
| <p>Guo JH, et al<br/>2012 (China)<br/>[29]</p> | <p>Mixed intensive care<br/>unit patients (80)</p> | <p>1) <b>Traditional Chinese medicine group: Chenxia Sijunzi decoction;</b><br/>2) Western medicine group: mosapride dispersible tablets 5 mg and multienzyme tablets NG;<br/>3) Control group: routine symptomatic<del>ally</del> <del>treat</del><del>mented</del> without any medicines <del>for</del><del>to</del> promoting<del>ge</del> gastrointestinal <del>power</del> function.</p> | <p>The time <del>ofto</del> bowel sound recovery; <del>the</del> time <del>ofto</del> passage of gas by anus recovery; <del>the</del> time <del>toofthe</del> bowel movement recovery<br/>41.02±7.52<sup>a</sup>; 49.90±6.95<sup>a</sup>; 58.22±6.71<sup>a</sup><br/>44.02±6.23<sup>a</sup>; 51.32±5.12<sup>a</sup>; 60.91±3.72<sup>a</sup><br/>54.62±5.51; 64.68±9.47; 78.20±7.11</p> | <p><sup>a</sup>P&lt;0.01</p>     | <p>Chenxia Sijunzi decoction can promote severe patient<del>s</del>'s gastrointestinal function recovery. <del>And there were not</del><del>No any</del> significant differences in each testing index <del>were found</del> between <del>the</del> traditional Chinese medicine and <del>w</del>Western medicine groups.</p> |
| <p>Kooshki et al<br/>2018 (Iran)<br/>[30]</p>  | <p>Mixed intensive care<br/>unit patients (60)</p> | <p>1) Fenugreek seed powder 3_g q12h NG;<br/>2) Routine care.</p>                                                                                                                                                                                                                                                                                                                             | <p>GRV at <del>the</del> 5<sup>th</sup> day; diarrhea; constipation; respiratory aspiration at 5<sup>th</sup>/6<sup>th</sup> days<br/>28.06±9.23; 1/30 (3.3%); 3/30 (10%); 1/30 (3.3%)<br/>38.94±9.54; 6/30 (20%); 21/30 (70%); 10/30 (33.3%)</p>                                                                                                                                      | <p>0.001; 0.04; 0.001; 0.005</p> | <p><del>The</del> <del>B</del>beneficial effects of fenugreek seeds on food intolerance in critically ill patients.</p>                                                                                                                                                                                                       |

|                                    |                                         |                                                                                                     |                                                                                                                                                                                                                                |              |                                                                                                                                              |
|------------------------------------|-----------------------------------------|-----------------------------------------------------------------------------------------------------|--------------------------------------------------------------------------------------------------------------------------------------------------------------------------------------------------------------------------------|--------------|----------------------------------------------------------------------------------------------------------------------------------------------|
| Tahershamsi et al 2018 (Iran) [40] | Mixed intensive care unit patients (50) | 1) Gastrolit (Zataria multiflora) (20 drops) q8h× 4 days;<br>2) Placebo = water.                    | GRV on the second, third, <u>and</u> fourth days<br>The data <del>did</del> could not be extracted                                                                                                                             | All P<0.0001 | Gastrolit can decrease GRV in mechanically ventilated patients                                                                               |
| Doi et al 2019 (Japan) [28]        | Mixed intensive care unit patients      | 1) Rikkunshito 5 g q8h ×5 days;<br>2) Rikkunshito 2.5 g q8h×5 days;<br>3) No rikkunshito (control). | GRV; the percentage of the target energy at the 5 <sup>th</sup> day; <del>achieved</del> the target energy <u>was achieved</u> at the 5 <sup>th</sup> day<br>No report; 62%; 63%<br>No report; 40%; 38%<br>No report; 59%; 56% | NS; NS; NS   | Standard- or high-dose rikkunshito did not improve <del>the</del> achievement of <u>the</u> enteral calorie target in critically ill adults. |

291 FI, feeding intolerance; NS, not significant; <sup>a</sup>P<0.01, compared with the control group.

## 292 **Effect on hospital or ICU length of stay**

293 The effect of prokinetics on hospital length of stay ~~has been~~was examined by five studies [26, 28-30,  
294 32]. ~~The~~ese five studies, which ~~enroll~~inged a total of 250 patients, demonstrated ~~that there was~~ a  
295 significant difference in the hospital length of stay between the ~~use of~~ prokinetic agent treated groups  
296 and the control group (MD -3.21, 95% CI -5.35, -1.06; P = 0.003; I<sup>2</sup> = 28%) (**Fig 2**). Three studies  
297 evaluated the effect of prokinetics on ICU length of stay in the critical care setting [26, 28, 30]. These  
298 three studies, enrolling a total of 186 patients, showed that the prokinetic agents appear to have a  
299 positive effect on shortening ICU length of stay (MD -2.03, 95% CI -3.96, -0.10; P = 0.04; I<sup>2</sup> = 0%)  
300 (**Fig 3**). Additionally, the separate effects of different prokinetics on the ICU length of stay and  
301 hospital length of stay are presented in **S3 Table**.

302 **Fig 2. Forest plot for hospital length of stay outcomes.** IV: inverse variance; CI: confidence interval.

303 **Fig 3. Forest plot for ICU length of stay outcomes.** IV: inverse variance; CI: confidence interval.

## 304 **Effect on reported adverse events**

305 Seven studies reported events that met the definition of adverse events in 757 critically ill  
306 patients [26-28, 30-32, 35]. The meta-analysis showed ~~that there was~~ no significant  
307 difference in the risk of reported adverse events between the prokinetic agent group and the  
308 control group (RR 1.13, 95% CI 0.92, 1.38; P = 0.25; I<sup>2</sup> = 0%) (**S2 Fig**).

## 309 **Effect on all-cause mortality**

310 The effect of prokinetic agents on all-cause mortality has been examined by six studies in 691  
311 critically ill patients [26, 28, 31, 32, 34, 35]. There was no significant difference in all-cause  
312 mortality between the prokinetic agent group and the control group (RR 0.96, 95% CI 0.81,  
313 1.14; P = 0.64; I<sup>2</sup> = 0%) (**S3 Fig**).

## 314 **Subgroup analysis**

315 Although no significant heterogeneity was found, we performed subgroup analyses to  
316 determine ~~if there are~~whether important subgroup differences existed. In the subgroup analysis  
317 stratified by type of prokinetic agents, ~~there were~~ no significant subgroup differences s were  
318 detected in the clinical outcomes of hospital length of stay, ICU length of stay, reported adverse  
319 events and all-cause mortality (**S4, 5, 6 and 7 Figs**). Furthermore, ~~there was~~ no study ~~comparing~~  
320 compared the combination of prokinetics to placebo or no treatment. Only one study about  
321 the preventive usage of prokinetics for risk patients demonstrated the outcome of reported  
322 adverse events [27]. The others were about the preventive usage of prokinetics for all  
323 patients. The subgroup analysis result of the preventive usage of prokinetics for all patients  
324 did not show important changes in the pooled effects of the reported adverse events.

## 325 **Sensitivity analysis**

326 The sensitivity analysis, which was performed by excluding the trials with a high risk of bias [28, 31],  
327 did not show important changes in the pooled effects of hospital length of stay, ICU length of stay,  
328 reported adverse events, or all-cause mortality. (Supplemental materials: **S8, 9, 10 and 11 Figs**).

## 329 **Certainty of evidence**

330 The certainty of evidence was moderate for the clinical outcome of all-cause mortality. However, the  
331 certainty of evidence was low for the clinical outcomes of ICU length of stay, hospital length of stay  
332 and reported adverse events. The details of the risk of bias and quality assessment are outlined in  
333 **Table 3**.

Table 3. GRADE evidence profile of the efficacy and safety of prokinetics in critically ill adult patients receiving gastric feeding tubes

| Certainty assessment                     |                   |                       |                           |                          |                           |                      | No. of patients    |                    | Effect                    |                                                                                                  | Certainty        | Importance |
|------------------------------------------|-------------------|-----------------------|---------------------------|--------------------------|---------------------------|----------------------|--------------------|--------------------|---------------------------|--------------------------------------------------------------------------------------------------|------------------|------------|
| No. of studies                           | Study design      | Risk of bias          | Inconsistency             | Indirectness             | Imprecision               | Other considerations | Prokinetics        | Placebo            | Relative (95% CI)         | Absolute (95% CI)                                                                                |                  |            |
| <b>Effect on ICU length of stay</b>      |                   |                       |                           |                          |                           |                      |                    |                    |                           |                                                                                                  |                  |            |
| 3                                        | randomized trials | serious <sup>1</sup>  | not serious <sup>2</sup>  | not serious <sup>3</sup> | serious <sup>4</sup>      | none <sup>5</sup>    | 96                 | 90                 | -                         | MD 2.03 days lower<br>(3.96 days lower to 0.1 days lower)                                        | ⊕⊕○○<br>LOW      | IMPORTANT  |
| <b>Effect on hospital length of stay</b> |                   |                       |                           |                          |                           |                      |                    |                    |                           |                                                                                                  |                  |            |
| 5                                        | randomized trials | serious <sup>6</sup>  | not serious <sup>7</sup>  | not serious <sup>3</sup> | serious <sup>8</sup>      | none <sup>5</sup>    | 141                | 109                | -                         | MD 3.21 days lower<br>(5.35 days lower to 1.06 days lower)                                       | ⊕⊕○○<br>LOW      | IMPORTANT  |
| <b>Effect on reported adverse events</b> |                   |                       |                           |                          |                           |                      |                    |                    |                           |                                                                                                  |                  |            |
| 7                                        | randomized trials | serious <sup>9</sup>  | not serious <sup>10</sup> | not serious <sup>3</sup> | serious <sup>11</sup>     | none                 | 105/320<br>(32.8%) | 120/437<br>(27.5%) | RR 1.13<br>(0.92 to 1.38) | 40 more RAE more per 1,000 patients<br>(from 20 fewer RAE fewer to 100 more RAE more)            | ⊕⊕○○<br>LOW      | IMPORTANT  |
| <b>Effect on all-cause mortality</b>     |                   |                       |                           |                          |                           |                      |                    |                    |                           |                                                                                                  |                  |            |
| 6                                        | randomized trials | serious <sup>12</sup> | not serious <sup>13</sup> | not serious <sup>3</sup> | not serious <sup>14</sup> | none                 | 114/286<br>(39.9%) | 174/405<br>(43.0%) | RR 0.96<br>(0.81 to 1.14) | 30 fewer deaths fewer per 1,000 patients<br>(from 100 fewer deaths fewer to 40 more deaths more) | ⊕⊕⊕○<br>MODERATE | CRITICAL   |

335 CI: Confidence interval; RR: Risk ratio; MD: Mean difference; RAE: Reported adverse events.

336 1. We downgraded the quality of evidence for risk of bias by one level. Two of three included studies had a were at high or unclear risk of bias.

337 2. We did not downgrade for inconsistency,  $I^2=0\%$  and  $\text{Chi}^2 = 1.45$ ,  $P=0.48$ .

- 338 3. Although the studies included any critically ill patient, we did not downgrade for indirectness.
- 339 4. We downgraded ~~the quality of evidence~~ for imprecision by one level, because ~~the~~ total population size is less than 400. ~~A~~~~The~~~~nd~~ 95% confidence interval contained ~~a~~ small  
340 benefit that did not meet the clinical decision threshold (min. one day).
- 341 5. We did not downgrade for publication bias, although we could not assess this category reliably due to ~~the~~ small number of eligible studies. ~~Because~~~~N~~~~ot~~ all ~~of~~ included studies  
342 ~~were~~ showing ~~ing~~ benefits of the studied intervention.
- 343 6. We downgraded the quality of evidence for risk of bias by one level. Most studies had ~~an~~ unclear risk of bias. ~~Besides~~~~In~~ ~~addition~~, one study lacked ~~of~~ allocation concealment  
344 and blinding.
- 345 7. We did not downgrade for inconsistency,  $I^2=28\%$  and  $Chi^2 = 5.52$ ,  $P=0.24$ .
- 346 8. We downgraded the quality of evidence by one level for imprecision ~~because~~, the population size is less than 400.
- 347 9. We downgraded the quality of evidence for risk of bias by one level. Most studies had ~~an~~ unclear risk of bias. ~~Besides~~~~In~~ ~~addition~~, two studies lacked ~~of~~ allocation concealment  
348 and/or blinding.
- 349 10. We did not downgrade for inconsistency,  $I^2=0\%$  and  $Chi^2 = 1.64$ ,  $P=0.95$ .
- 350 11. We downgraded ~~the quality of evidence~~ for imprecision by one level, because ~~the~~ 95% confidence interval around the pooled effect included both no effect and appreciable  
351 harm (~~the~~~~a~~ relative risk increase greater than 25%).
- 352 12. We downgraded the quality of evidence for risk of bias by one level. Most studies had ~~an~~ unclear risk of bias. ~~Besides~~~~In~~ ~~addition~~, two studies lacked ~~of~~ allocation  
353 concealment, and two studies lacked ~~of~~ blinding.
- 354 13. We did not downgrade for inconsistency,  $I^2=0\%$  and  $Chi^2 = 4.52$ ,  $P=0.48$ .
- 355 14. We did not downgrade for imprecision, because ~~the~~ 95% confidence interval around the pooled effect did not include both no effect and ~~an~~ appreciable benefit (~~the~~~~a~~ relative  
356 risk reduction greater than 25%) or appreciable harm (~~the~~~~a~~ relative risk increase greater than 25%).

## 357 Discussion

358 In this systematic review, we conducted a comprehensive literature search and used objective criteria  
359 for study inclusion. Fifteen studies were included in the final analysis. Because of small sample sizes  
360 and a relatively small amount of research, the accuracy of the pooled effect is lacking in quantitative  
361 analysis. ~~The majority of~~Most studies (10 of 13, 76.92%) found that prokinetic agents  
362 showed beneficial effects on feeding tolerance in critically ill adults. The negative studies (3 of 13,  
363 23.08%) were hampered by special populations of ~~neuro-critical neurocritical~~ patients and critical  
364 traumatic brain injury patients ~~with~~ taking metoclopramide and by the use of ~~the~~ specific drug ~~of~~  
365 rikkunshito. Furthermore, the use of prokinetic agents in critically ill patients receiving gastric feeding  
366 may reduce ~~the~~ ICU or hospital length of stay, but the certainty of evidence was low due to risk of bias  
367 and imprecision. Prokinetics did not significantly reduce the risks of reported adverse events or all-  
368 cause mortality.

369 In this study, we examined the effect of prokinetic agents on gastrointestinal symptoms, feeding  
370 tolerance and clinical outcomes. Compared to the control group, prokinetics did not reduce the risk of  
371 mortality; these results were the same as the results of the meta-analysis by Lewis, K. et al. [14],  
372 but our methods are different. Lewis, K. et al. [14] defined feeding intolerance as either GRV  $\geq 150$   
373 ~~ml~~ mL, vomiting, or abdominal distention resulting in feeding interruption. This definition may be  
374 considered obsolete [15]. We defined gastric feeding intolerance as either GRV  $\geq 500$  ~~ml~~ mL or  
375 concomitant ~~with~~ symptoms of nausea, vomiting, abdominal distention, regurgitation or other  
376 symptoms resulting in feeding interruption in critically ill adult patients receiving gastric feeding tubes.  
377 We excluded studies that discontinued or interrupted gastric feeding prematurely following the  
378 disappearance of gastric feeding intolerance. Under this latest definition, our meta-analysis found  
379 some new studies [26-30, 33, 34], ~~besides and~~ we identified 5 studies regarding the administration of  
380 prokinetics ~~of including~~ herbal medicines/natural medicines in critically ill adult patients receiving  
381 gastric feeding tubes ~~in critically ill patients adults~~ [28-30, 37, 40].

382 Additionally, we found that prokinetic agents might reduce the ICU or hospital length of stay ~~in-for~~  
383 critically ill patients receiving gastric feeding. However, the number of studies and the sample size  
384 were very small, and the certainty of evidence was low. Furthermore, ~~there was~~ no significant  
385 difference was found between prokinetic agent groups and placebo/no treatment in the risks of  
386 reported adverse events and all-cause mortality. Therefore, we cannot draw a convincing conclusion  
387 that the use of prokinetics ~~could~~ can improve clinical outcomes in critically ill adults. ~~We recommend~~  
388 ~~a more comprehensive search and further original studies on this topic.~~ We recommend that more  
389 research needs to should be conducted in this field.

390 This study has several limitations. First, RCTs from 21 published original studies or trials registered in  
391 the International Clinical Trials Registry Platform (WHO) or clinicaltrials.gov were identified.

392 However, 6 trials were completed, but the results were not available, which might lead to the omission  
393 of trials meeting the inclusion criteria and might have publication bias. Second, some included trials  
394 did not test the baseline status of feeding intolerance for all participants. The subgroup results might  
395 have been different if all individuals were tested. Third, we were unable to comprehensively evaluate  
396 the risk of bias in 12 studies with a lack of information. Fourth, in each outcome, the total sample size  
397 was relatively small, which likely had inadequate power to detect a difference in treatment effect. We  
398 recommend that more original studies about this topic be conducted.

## 399 Conclusion

400 As a class of drugs, prokinetic agents may improve gastric feeding tolerance in critically ill adults.

401 However, ~~there is very low~~ certainty ~~in-of~~ the evidence suggesting that prokinetic agents are effective  
402 ~~in-for~~ reducing the ICU or hospital length of stay is low. There was also no significant reduction in the  
403 risk of reported adverse events and all-cause mortality. Additional RCTs are needed to determine the  
404 effect of prokinetics on clinical outcomes in critically ill patients in the future.

## 405 Acknowledgments



406 We are grateful to all the staff in this study for their teamwork and persistent efforts, and we are also  
407 thankful to the Group of People with Highest Risk of Drug Exposure of the International Network for  
408 the Rational Use of Drugs, China, and the Evidence-Based Pharmacy Committee of the Chinese  
409 Pharmaceutical Association for providing methodologies.

## 410 **Ethics approval and consent to participate**

411 Not applicable.

## 412 **Competing interests**

413 We declare that we have no conflicts of interest.

## 414 **Funding**

415 The funders had no role in the study design, data collection and analysis, the decision to publish, or  
416 preparation of the manuscript.

## 417 **Author Contributions**

418 LLZ conceived the study and designed the study. RP and HLL had full access to all of the data in the  
419 study, and take responsibility for the integrity of the data and the accuracy of the data analysis. RP and  
420 HLL developed and tested the data collection form. All authors acquired the data. HLL and RP  
421 conducted the analysis, interpreted the data, and drafted the manuscript. All authors critically revised  
422 the manuscript. LLZ is the guarantor.

## 423 **Consent for publication**

424 Written informed consent for publication was obtained from all participants.

## 425 **Availability of data and material**

426 All data generated or analyzed during this study are included in this published article.

## 427 **References**

- 428 1.     Lew CCH, Yandell R, Fraser RJL, Chua AP, Chong MFF, Miller M. Association Between Malnutrition  
429     and Clinical Outcomes in the Intensive Care Unit: A Systematic Review [Formula: see text]. *JPEN J*  
430     *Parenter Enteral Nutr.* 2017;41(5):744-758.
- 431 2.     McClave SA, Taylor BE, Martindale RG, Warren MM, Johnson DR, Braunschweig C, McCarthy MS,  
432     Davanos E, Rice TW, Cresci GA, Gervasio JM, Sacks GS, Roberts PR, Compher C, Society of Critical  
433     Care M, American Society for P, Enteral N. Guidelines for the Provision and Assessment of Nutrition  
434     Support Therapy in the Adult Critically Ill Patient: Society of Critical Care Medicine (SCCM) and  
435     American Society for Parenteral and Enteral Nutrition (A.S.P.E.N.). *JPEN J Parenter Enteral Nutr.*  
436     2016;40(2):159-211.
- 437 3.     Singer P, Blaser AR, Berger MM, Alhazzani W, Calder PC, Casaer MP, Hiesmayr M, Mayer K,  
438     Montejo JC, Pichard C, Preiser JC, van Zanten ARH, Oczkowski S, Szczeklik W, Bischoff SC. ESPEN  
439     guideline on clinical nutrition in the intensive care unit. *Clin Nutr.* 2019;38(1):48-79.
- 440 4.     Elke G, Felbinger TW, Heyland DK. Gastric residual volume in critically ill patients: a dead marker or  
441     still alive?. [Review].1.
- 442 5.     Blaser AR, Starkopf J, Kirsimagi U, Deane AM. Definition, prevalence, and outcome of feeding  
443     intolerance in intensive care: a systematic review and meta-analysis. *Acta Anaesthesiol Scand.*  
444     2014;58(8):914-922.
- 445 6.     Reintam Blaser A, Malbrain ML, Starkopf J, Fruhwald S, Jakob SM, De Waele J, Braun JP, Poeze M,  
446     Spies C. Gastrointestinal function in intensive care patients: terminology, definitions and management.  
447     Recommendations of the ESICM Working Group on Abdominal Problems. *Intensive Care Med.*  
448     2012;38(3):384-394.
- 449 7.     Hu B, Sun R, Wu A, Ni Y, Liu J, Guo F, Ying L, Ge G, Ding A, Shi Y, Liu C, Xu L, Jiang R, Lu J, Lin  
450     R, Zhu Y, Wu W, Xie B. Prognostic Value of Prolonged Feeding Intolerance in Predicting All-Cause  
451     Mortality in Critically Ill Patients: A Multicenter, Prospective, Observational Study. *JPEN J Parenter*  
452     *Enteral Nutr.* 2019.
- 453 8.     Gungabissoon U, Hacquoil K, Bains C, Irizarry M, Dukes G, Williamson R, Deane AM, Heyland DK.  
454     Prevalence, risk factors, clinical consequences, and treatment of enteral feed intolerance during critical  
455     illness. *JPEN J Parenter Enteral Nutr.* 2015;39(4):441-448.
- 456 9.     Heyland DK, Dhaliwal R, Drover JW, Gramlich L, Dodek P, Canadian Critical Care Clinical Practice  
457     Guidelines C. Canadian clinical practice guidelines for nutrition support in mechanically ventilated,  
458     critically ill adult patients. *JPEN J Parenter Enteral Nutr.* 2003;27(5):355-373.

- 459 **10.** Consensus of early enteral nutrition clinical practice in critically ill patients. *Chinese Critical Care*  
460 *Medicine*. 2018;30(8):715-721.
- 461 **11.** Taylor BE, McClave SA, Martindale RG, Warren MM, Johnson DR, Braunschweig C, McCarthy MS,  
462 Davanos E, Rice TW, Cresci GA, Gervasio JM, Sacks GS, Roberts PR, Compher C, Society of Critical  
463 Care M, American Society of P, Enteral N. Guidelines for the Provision and Assessment of Nutrition  
464 Support Therapy in the Adult Critically Ill Patient: Society of Critical Care Medicine (SCCM) and  
465 American Society for Parenteral and Enteral Nutrition (A.S.P.E.N.). *Crit Care Med*. 2016;44(2):390-  
466 438.
- 467 **12.** Reintam Blaser A, Starkopf J, Alhazzani W, Berger MM, Casaer MP, Deane AM, Fruhwald S,  
468 Hiesmayr M, Ichai C, Jakob SM, Loudet CI, Malbrain ML, Montejo Gonzalez JC, Paugam-Burtz C,  
469 Poeze M, Preiser JC, Singer P, van Zanten AR, De Waele J, Wendon J, Wernerman J, Whitehouse T,  
470 Wilmer A, Oudemans-van Straaten HM, Function EWGoG. Early enteral nutrition in critically ill  
471 patients: ESICM clinical practice guidelines. *Intensive Care Med*. 2017;43(3):380-398.
- 472 **13.** Peng R. The efficacy and safety of administration of prokinetics improve clinical outcomes in critically  
473 ill patients is still quite unclear. *Clinical Nutrition*. 2020;39:307-309.
- 474 **14.** Lewis K, Alqahtani Z, McIntyre L, Almenawer S, Alshamsi F, Rhodes A, Evans L, Angus DC,  
475 Alhazzani W. The efficacy and safety of prokinetic agents in critically ill patients receiving enteral  
476 nutrition: A systematic review and meta-analysis of randomized trials. *Critical Care*. 2016;20 (1) (no  
477 pagination)(259).
- 478 **15.** Dive A. Benefit of prokinetics during enteral nutrition: still searching for a piece of evidence. *Crit Care*.  
479 2016;20(1):341.
- 480 **16.** Higgins JPT, Green S, eds. Cochrane Handbook for Systematic Reviews of Interventions, version 5.1.0  
481 (updated March 2011). Cochrane Collaboration website. <http://training.cochrane.org/handbook>. 2011.  
482 Accessed November 22, 2017.
- 483 **17.** Liberati A, Altman DG, Tetzlaff J, Mulrow C, Gotzsche PC, Ioannidis JP, Clarke M, Devereaux PJ,  
484 Kleijnen J, Moher D. The PRISMA statement for reporting systematic reviews and meta-analyses of  
485 studies that evaluate health care interventions: explanation and elaboration. *J Clin Epidemiol*.  
486 2009;62(10):e1-34.
- 487 **18.** Gupta SK. Intention-to-treat concept: A review. *Perspect Clin Res*. 2011;2(3):109-112.
- 488 **19.** Schulz KF, Altman DG, Moher D, Group C. CONSORT 2010 statement: updated guidelines for  
489 reporting parallel group randomised trials. *PLoS Med*. 2010;7(3):e1000251.
- 490 **20.** Luo D, Wan X, Liu J, Tong T. Optimally estimating the sample mean from the sample size, median,  
491 mid-range, and/or mid-quartile range. *Stat Methods Med Res*. 2018;27(6):1785-1805.
- 492 **21.** Wan X, Wang W, Liu J, Tong T. Estimating the sample mean and standard deviation from the sample  
493 size, median, range and/or interquartile range. *BMC Med Res Methodol*. 2014;14:135.
- 494 **22.** Deeks JJ. Issues in the selection of a summary statistic for meta-analysis of clinical trials with binary  
495 outcomes. *Stat Med*. 2002;21(11):1575-1600.
- 496 **23.** Borenstein M, Hedges LV, Higgins JP, Rothstein HR. A basic introduction to fixed-effect and random-  
497 effects models for meta-analysis. *Res Synth Methods*. 2010;1(2):97-111.

- 498 24. Furukawa TA, Watanabe N, Omori IM, Montori VM, Guyatt GH. Association between unreported  
499 outcomes and effect size estimates in Cochrane meta-analyses. *JAMA*. 2007;297(5):468-470.
- 500 25. Guyatt GH, Oxman AD, Vist GE, Kunz R, Falck-Ytter Y, Alonso-Coello P, Schunemann HJ, Group  
501 GW. GRADE: an emerging consensus on rating quality of evidence and strength of recommendations.  
502 *BMJ*. 2008;336(7650):924-926.
- 503 26. Acosta-Escribano J, Almanza Lopez S, Plumed Martin L, Garcia Martinez MA, Tajadura Manjarin N.  
504 The metoclopramide effect on enteral nutrition tolerance and mechanical ventilation associated  
505 pneumonia in neuro critically ill patients. *Nutricion hospitalaria*. 2014;29(6):1345-1351.
- 506 27. Chapman MJ, Deane AM, O'Connor SL, Nguyen NQ, Fraser RJL, Richards DB, Hacquoil KE, Vasist  
507 Johnson LS, Barton ME, Dukes GE. The effect of camicinal (GSK962040), a motilin agonist, on gastric  
508 emptying and glucose absorption in feed-intolerant critically ill patients: a randomized, blinded,  
509 placebo-controlled, clinical trial <https://www.ncbi.nlm.nih.gov/pmc/articles/PMC4967996/>. *Critical*  
510 *care*. 2016;20(1).
- 511 28. Doi M, Miyamoto K, Shimokawa T, Ariyasu H, Kaneko M, Yonemitsu T, Nakashima T, Matsumoto H,  
512 Shibata M, Shibata N, Soda M, Kitaichi K, Kato S. The effect of standard and high dose of rikkunshito  
513 on achievement of enteral nutrition target in critically ill patients: a pilot randomized controlled trial.  
514 *Acute medicine and surgery*. 2019.
- 515 29. Guo JH, Chen G, Yang SQ, Wei MH, Chen X. Clinical observation of the role of Chenxia Sijunzi  
516 decoction in promoting the recovery of gastrointestinal function in critically ill patients. *Zhongguo wei*  
517 *zhong bing ji jiu yi xue [Chinese critical care medicine]*. 2012;24(11):674-676.
- 518 30. Kooshki A, Khazaei Z, Zarghi A, Rad M, Mohammadi HG, Tabaraie Y. Effects of fenugreek seed  
519 powder on enteral nutrition tolerance and clinical outcomes in critically ill patients: a randomized  
520 clinical trial. *Biomedical research and therapy*. 2018;5(7):2528-2537.
- 521 31. Nassaji M, Ghorbani R, Frozeshfard M, Mesbahian F. Effect of metoclopramide on nosocomial  
522 pneumonia in patients with nasogastric feeding in the intensive care unit. *La revue de sante de la*  
523 *Mediterranee orientale / al-Majallah al-sihhiyah li-sharq al-mutawassit [Eastern Mediterranean health*  
524 *journal]*. 2010;16(4):371-374.
- 525 32. Nursal TZ, Erdogan B, Noyan T, Cekinmez M, Atalay B, Bilgin N. The effect of metoclopramide on  
526 gastric emptying in traumatic brain injury. *J Clin Neurosci*. 2007;14(4):344-348.
- 527 33. Ritz MA, Chapman MJ, Fraser RJ, Finnis ME, Butler RN, Cmielewski P, Davidson GP, Rea D.  
528 Erythromycin dose of 70 mg accelerates gastric emptying as effectively as 200 mg in the critically ill.  
529 *Intensive care medicine*. 2005;31(7):949-954.
- 530 34. Spapen HD, Duinslaeger L, Diltoer M, Gillet R, Bossuyt A, Huyghens LP. Gastric emptying in  
531 critically ill patients is accelerated by adding cisapride to a standard enteral feeding protocol: results of  
532 a prospective, randomized, controlled trial. *Critical care medicine*. 1995;23(3):481-485.
- 533 35. Yavagal DR, Karnad DR, Oak JL. Metoclopramide for preventing pneumonia in critically ill patients  
534 receiving enteral tube feeding: a randomized controlled trial. *Critical care medicine*. 2000;28(5):1408-  
535 1411.

- 536 36. Heyland DK, Tougas G, Cook DJ, Guyatt GH. Cisapride improves gastric emptying in mechanically  
537 ventilated, critically ill patients. A randomized, double-blind trial. *American journal of respiratory and*  
538 *critical care medicine*. 1996;154(6 Pt 1):1678-1683.
- 539 37. Mokhtari M, Shariatpanahi Z. Ginger extract dietary supplementation effects on delayed gastric  
540 emptying and ventilator-associated pneumonia in adult respiratory distress syndrome patients. *Critical*  
541 *Care*. 2009;1):S56.
- 542 38. Rajan V, Maiwall R, Choudhury AK, Jamwal KD, Benjamin J, Kumar G, Joshi YK, Sarin SK. Early  
543 addition of prokinetics reverses gut paralysis and improves survival in critically ill cirrhotics-An open  
544 label placebo controlled RCT (Feed Intolerance and Treatment-FIT protocol). NCT02528760.  
545 *Hepatology*. 2017;66.
- 546 39. Sustic A, Zelic M, Protic A, Zupan Z, Simic O, Desa K. Metoclopramide improves gastric but not  
547 gallbladder emptying in cardiac surgery patients with early intragastric enteral feeding: randomized  
548 controlled trial. *Croatian medical journal*. 2005;46(2):239-244.
- 549 40. Tahershamsi F, Rezaei K, Khosravi S, Kheyri Z, Memarzadeh MR, Rafie F. Effect of oral drop gastrolit  
550 (*Zataria multiflora*) on gastric residual volume in mechanically ventilated patients hospitalized in the  
551 intensive care units. *Journal of medicinal plants*. 2018;17(68):66-73.
- 552 41. Chapman MJ, Fraser RJ, Kluger MT, Buist MD, De Nichilo DJ. Erythromycin improves gastric  
553 emptying in critically ill patients intolerant of nasogastric feeding. *Critical care medicine*.  
554 2000;28(7):2334-2337.
- 555 42. Deane AM, Lamontagne F, Dukes GE, Neil D, Vasist L, Barton ME, Hacquoil K, Ou X, Richards D,  
556 Stelfox HT, Mehta S, Day AG, Chapman MJ, Heyland DK. Nutrition Adequacy Therapeutic  
557 Enhancement in the Critically Ill: a Randomized Double-Blind, Placebo-Controlled Trial of the Motilin  
558 Receptor Agonist Camicinal (GSK962040): the NUTRIATE Study. *Journal of parenteral and enteral*  
559 *nutrition*. 2018;42(5):949-959.
- 560 43. Pinilla JC, Samphire J, Arnold C, Liu L, Thiessen B. Comparison of gastrointestinal tolerance to two  
561 enteral feeding protocols in critically ill patients: a prospective, randomized controlled trial. *Journal of*  
562 *Parenteral and Enteral Nutrition* 2001;25(2):81-6.
- 563 44. Reignier J, Bensaid S, Perrin-Gachadoat D, Burdin M, Boiteau R, Tenaillon A. Erythromycin and early  
564 enteral nutrition in mechanically ventilated patients. *Critical care medicine*. 2002;30(6):1237-1241.
- 565 45. Taylor SJ, Allan K, McWilliam H, Manara A, Brown J, Greenwood R, Toher D. A randomised  
566 controlled feasibility and proof-of-concept trial in delayed gastric emptying when metoclopramide fails:  
567 we should revisit nasointestinal feeding versus dual prokinetic treatment: achieving goal nutrition in  
568 critical illness and delayed gastric emptying: trial of nasointestinal feeding versus nasogastric feeding  
569 plus prokinetics. *Clinical nutrition ESPEN*. 2016;14:1-8.
- 570 46. Boivin MA, Levy H. Gastric feeding with erythromycin is equivalent to transpyloric feeding in the  
571 critically ill. *Critical care medicine*. 2001;29(10):1916-1919.
- 572 47. Euctr ES. A Phase 2, Multicenter, Randomized, Double-Blind, Comparator-Controlled Study of the  
573 Efficacy, Safety, and Pharmacokinetics of Intravenous Ulimorelin (LP101) in Patients with Enteral  
574 Feeding Intolerance. <http://www.who.int/trialsearch/Trial2.aspx?TrialID=EUCTR2016>. 2016.

- 575 48. Hayakawa M, Ono Y, Wada T, Yanagida Y, Sawamura A, Takeda H, Gando S. Effects of rikkunshito  
576 (traditional Japanese medicine) on enteral feeding and the plasma ghrelin level in critically ill patients: a  
577 pilot study. *Journal of intensive care*. 2014;2(1).
- 578 49. Heyland DK, van Zanten ARH, Grau-Carmona T, Evans D, Beishuizen A, Schouten J, Hoiting O,  
579 Bordeje ML, Krell K, Klein DJ, Gonzalez J, Perez A, Brown R, James J, Harris MS, Heyland DK,  
580 Evans DC, Jolley S, Raines R, Krell K, Falls I, Grau-Carmona T, Servia-Goixart L, Perez-Quesada S,  
581 Herrero-Meseguer JI, Calvo-Herranz E, Lorencio C, Peredes A, Yebenes-Reyes JC, Garcia-Martinez  
582 MA, Cervera M, Bordeje ML, Fernandez-Ortega JF, Fernandez-Gonzalez I, van Zanten A, Beishuizen A,  
583 Schouten J, Hoiting O, Wilhelmina C, Stelfox T, Posadas J. A multicenter, randomized, double-blind  
584 study of ulimorelin and metoclopramide in the treatment of critically ill patients with enteral feeding  
585 intolerance: PROMOTE trial. *Intensive care medicine*. 2019;45(5):647-656.
- 586 50. Irct201112014578N. The effect of acupuncture and traditional pharmacologic therapy on Delayed  
587 Gastric Emptying. <http://www.who.int/trialsearch/Trial2.aspx?TrialID=IRCT201112014578N4>. 2012.
- 588 51. Irct201408104365N. Combination of Neostigmine and Metoclopramide to reduce gastric residual  
589 volume in mechanically ventilated ICU patients.  
590 <http://www.who.int/trialsearch/Trial2.aspx?TrialID=IRCT201408104365N16>. 2015.
- 591 52. Irct201412044365N. Comparison of the effect of Neostigmine and Metoclopramide on gastric residual  
592 volume in mechanically ventilated ICU patients.  
593 <http://www.who.int/trialsearch/Trial2.aspx?TrialID=IRCT201412044365N18>. 2014.
- 594 53. MacLaren R, Patrick WD, Hall RI, Rocker GM, Whelan GJ, Lima JJ. Comparison of cisapride and  
595 metoclopramide for facilitating gastric emptying and improving tolerance to intragastric enteral  
596 nutrition in critically III, mechanically ventilated adults. *Clinical therapeutics*. 2001;23(11):1855-1866.
- 597 54. Makkar JK, Gaudi B, Jain K, Jain D, Batra YK. Comparison of erythromycin versus metoclopramide for  
598 gastric feeding intolerance in patients with traumatic brain injury: a randomized double-blind study.  
599 *Saudi journal of anaesthesia*. 2016;10(3):308-313.
- 600 55. Malekolkottab M, Khalili H, Mohammadi M, Ramezani M, Nourian A. Metoclopramide as intermittent  
601 and continuous infusions in critically ill patients: a pilot randomized clinical trial. *Journal of*  
602 *comparative effectiveness research*. 2017;6(2):127-136.
- 603 56. Nct. A Randomized, Double-Blind Study to Evaluate the Safety, Tolerability, and Pharmacodynamics  
604 of a Single Dose of Intravenous TD-8954 Compared With Metoclopramide in Critically Ill Patients  
605 With Enteral Feeding Intolerance. <https://clinicaltrials.gov/show/NCT01953081>. 2013.
- 606 57. Nct. Itopride in Feeding Intolerance of Critically-ill Patients Receiving Enteral Nutrition.  
607 <https://clinicaltrials.gov/show/NCT03698292>. 2018.
- 608 58. Nguyen N, Chapman M, Fraser R, Sharley V, Kong S, Bryant L, et al. Erythromycin or metoclopramide  
609 for feed intolerance in the critically ill. *Critical care*. 2006;10(Suppl 1).
- 610 59. Taylor S, Manara A, Brown J. Treating delayed gastric emptying in critical illness: metoclopramide,  
611 erythromycin and bedside (Cortrak[™]) nasointestinal tube placement. *Journal of the intensive care*  
612 *society*. 2011;12(1):75-.

- 613 **60.** Yanagida Y, Hayakawa M, Yamamoto H, Wada T, Sugano M, Sawamura A, Gando S. Effects of  
614 rikkunshito (traditional Japanese medicine Kampo) on enteral feeding and plasma ghrelin concentration  
615 in critically ill patients: a double-blind, randomized, controlled trial. *Intensive care medicine.*  
616 2013;39:S242-S243.
- 617 **61.** Berne JD, Norwood SH, McAuley CE, Vallina VL, Villareal D, Weston J, McClarty J. Erythromycin  
618 reduces delayed gastric emptying in critically ill trauma patients: a randomized, controlled trial. *Journal*  
619 *of trauma.* 2002;53(3):422-425.
- 620 **62.** Meissner W, Dohrn B, Reinhart K. Enteral naloxone reduces gastric tube reflux and frequency of  
621 pneumonia in critical care patients during opioid analgesia. *Critical care medicine.* 2003;31(3):776-780.
- 622 **63.** Shariatpanahi ZV, Taleban FA, Mokhtari M, Shahbazi S. Ginger extract reduces delayed gastric  
623 emptying and nosocomial pneumonia in adult respiratory distress syndrome patients hospitalized in an  
624 intensive care unit. *Journal of critical care.* 2010;25(4):647-650.
- 625 **64.** Tamion F, Hamelin K, Duflo A, Girault C, Richard JC, Bonmarchand G. Gastric emptying in  
626 mechanically ventilated critically ill patients: effect of neuromuscular blocking agent. *Intensive care*  
627 *medicine.* 2003;29(10):1717-1722.
- 628 **65.** Chen JH, Hsieh CB, Chao PC, Liu HD, Chen CJ, Liu YC, Yu JC. Effect of water-soluble contrast in  
629 colorectal surgery: a prospective randomized trial. *World journal of gastroenterology.*  
630 2005;11(18):2802-2805.
- 631 **66.** Goldhill DR, Toner CC, Tarling MM, Baxter K, Withington PS, Whelpton R. Double-blind,  
632 randomized study of the effect of cisapride on gastric emptying in critically ill patients. *Critical care*  
633 *medicine.* 1997;25(3):447-451.
- 634 **67.** Warusevitane A, Karunatilake D, Sim J, Lally F, Roffe C. Safety and effect of metoclopramide to  
635 prevent pneumonia in patients with stroke fed via nasogastric tubes trial. *Stroke.* 2015;46(2):454-460.
- 636 **68.** Tctr. Efficacy and safety of oral Erythromycin estolate in combination with Metoclopramide versus  
637 Metoclopramide monotherapy in mechanically ventilated patients who developed enteral feeding  
638 intolerance: a randomized double-blind controlled study.  
639 <http://www.who.int/trialsearch/Trial2.aspx?TrialID=TCTR20171004004>. 2017.
- 640 **69.** NCT02528760. To Determine the Role of Prokinetics in Feed Intolerance in Critically Ill Cirrhosis.  
641 <https://clinicaltrials.gov/show/NCT02528760>. 2015.
- 642 **70.** NCT02379624. Pectin Start Early Enteral Nutritional Support in Critically Ill Patients.  
643 <https://clinicaltrials.gov/show/NCT02379624>. 2014.
- 644 **71.** IRCT201610297494N24. The prophylactic effect of cuminum cyminum extract on gastric residual  
645 volume in traumatic patients under ventilator hospitalized in intensive care unit.  
646 <http://www.who.int/trialsearch/Trial2.aspx?TrialID=IRCT201610297494N24>. 2017.
- 647 **72.** IRCT201009094722N2. The effect of Ginger extract on gastric residual volume in patients with  
648 mechanical ventilation hospitalized in intensive care unit.  
649 <http://www.who.int/trialsearch/Trial2.aspx?TrialID=IRCT201009094722N2>. 2011.

650 73. 2015/08/006111 C. Clinical trial to compare the efficacy of two oral prokinetics metoclopramide and  
651 erythromycin in non acceptance of feed in head injury patient.  
652 <http://www.who.int/trialssearch/Trial2.aspx?TrialID=CTRI>. 2015;08(006111).

653

## 654 Supporting information

655 S1 Table. Search ~~S~~strategy

656 S2 Table. Excluded ~~S~~studies

657 S3 Table. Separate effects of different prokinetic ~~agentss~~ on hospital or ICU length of stay

658 S4 Table. PRISMA ~~C~~checklist

659 S1 Fig. Risk of ~~B~~bias

660 S2 Fig. Reported adverse events ~~s~~ outcomes

661 S3 Fig. All-cause mortality outcomes

662 S4 Fig. Subgroup ~~A~~analysis by the type of prokinetic agents ~~in-outcome-offor~~ hospital length of  
663 stay outcomes

664 S5 Fig. Subgroup ~~A~~analysis by the type of prokinetic agents ~~in-outcome-offor~~ ICU length of stay  
665 outcomes

666 S6 Fig. Subgroup ~~A~~analysis by the type of prokinetic agents ~~in-outcome-offor~~ reported adverse  
667 event outcomess

668 S7 Fig. Subgroup ~~A~~analysis by the type of prokinetic agents ~~in-outcome-offor~~ all-cause mortality  
669 outcomes

670 S8 Fig. Sensitivity analysis ~~inof-outcome-of~~ hospital length of stay outcomes

671 S9 Fig. Sensitivity analysis ~~inof-outcome-of~~ ICU length of stay outcomes

672 S10 Fig. Sensitivity analysis ~~in-outcome-of~~ reported adverse events outcomes

673 S11 Fig. Sensitivity analysis ~~in-outcome-of~~ all-cause mortality outcomes



**Dear Editors and Reviewers,**

Thank you for your letter and the comments concerning our manuscript (Manuscript Number: PONE-D-20-01167R1). We appreciate your positive comments regarding our manuscript. Your suggestions and ideas have been carefully considered. Revised portions are marked with changes in colored fonts in the paper. We hope that the revised manuscript will meet with your approval. The main corrections in the paper and our responses to the reviewers' comments are as follows:

**Editors' comments:**

The review is greatly improved in clarity and transparency, but requires some minor changes. Please address the comments of the reviewers and in addition:

1. For Line 288-289 where you state that hospital LOS was not significant I suggest you revise to use the same language as in 292-3 for ICU LOS, in that there appears to be a positive effect, unless you wish to clarify in what way the hospital LOS was not significant (clinically?)

**Answer:** We sincerely appreciate your thoughtful advice. This mistake was due to our carelessness in writing, and all authors sincerely apologize for this mistake. We have corrected this error. In the revised paper, the text is as follows: "These five studies, which enrolled a total of 250 patients, demonstrated a significant difference in the hospital length of stay between the prokinetic agent-treated group and the control group (MD -3.21, 95% CI -5.35, -1.06; P = 0.003; I2 = 28%) (Fig 2)."

2. For the outcomes of gastrointestinal symptoms and feeding tolerance, you should mention that if outcomes could not be combined by meta-analysis you summarized them narratively. You only discuss in the methods how you will use meta-analysis and then you do not meta-analyse the symptoms and tolerance

outcomes, I assume because they are not appropriate to meta-analyze.

**Answer:** Yes. The various outcome definitions, especially for gastric tube tolerance, precluded quantitative synthesis of the data. According to your advice, we have amended this part in the revised manuscript as follows: “Thirteen studies evaluated the effect of prokinetics on gastrointestinal symptoms and/or feeding tolerance in adult critically ill patients receiving gastric feeding [26-30, 32-34, 36-40]. The main results obtained are as follows: gastric emptying, GRV, diarrhea, constipation, feeding complications and feeding intolerance. Gastric emptying was measured by the drug model of acetaminophen absorption or the <sup>13</sup>C-octanoic acid breath test with calculation of the gastric emptying time, gastric emptying coefficient or area under the plasma concentration-time curve. The various outcome definitions, especially for gastric tube tolerance, precluded quantitative synthesis of the data.”

3. For Line 301 and the outcome of adverse events it is preferable to use the term 'risk' rather than 'incidence' as incidence implies measurement of time at risk.

**Answer:** Yes. Following your suggestion, to be more accurate, we have replaced “incidence” with “risk”.

4. For Table 3 please include the units for each outcome, e.g., days and deaths

**Answer:** Thank you for this comment. We have revised the manuscript to include the unit for each outcome in Table 3. We hope that this change improves the readability of the data.

5. For all forest plots, including Fig 2, Fig 3, S2Fig and S3Fig, please specify the comparison and the outcome (with units) in the header and replace the bracketed experimental and control on the x axis with a legend indicating the comparisons.

**Answer:** Following your suggestion, we have added “units” and “legend” to each forest plot. These changes have been made to the text to improve the readability and to clarify the interpretation of the data.

**Reviewers' comments:**

**Reviewer #1:**

1. I thank the authors for the significant work done to address all comments and I find the reviewed submission substantially improved.

**Answer:** Thank you for your very considerate advice; your positive comment on our manuscript is sincerely appreciated. We will reply to your comments one by one in detail.

2. the length of stay unit for hospital and ICU is still not clear. I assume it is days. However, it would be nice to have it clarified. See my original comment #11.

**Answer:** We apologize for this mistake. The unit for the lengths of hospital stay and ICU stay is “days”. We have added “units” in Table 3 in the revised manuscript. We hope that these changes improve the readability and clarify the interpretation of the data.

3. line 377: "We recommend a more comprehensive search and further original studies on this topic." I recommend the words "more comprehensive search" be deleted as they give the impression the authors did not perform a comprehensive search.

**Answer:** Thank you for your thoughtful reminder. We agree with your advice; the words "more comprehensive search" have been deleted in the revised manuscript.

**Reviewer #3:**

Thank you for the opportunity to review the revised manuscript. In this systematic review, authors evaluated the effect of prokinetics in critically ill adults on gastric feeding tube tolerance according to the updated definition. This systematic review implies that prokinetics improves tolerance of enteral feeding, and additionally provides the attractive hypothesis that prokinetics may shorten the length of ICU and hospital stay. Although authors tried to perform meta-analysis about gastric feeding tube tolerance, study diversity (e.g. various interventions and various outcome definitions) did not allow the authors data synthesis. Authors seems to revise their manuscript well according to the previous editor's and reviewers' comments.

Comments to the authors:

1. As authors state in background, the aim of this study is to evaluate the effect of prokinetics on gastric feeding tube tolerance. So, the main results of this study is the description about this effect (L273-283), not about ICU and hospital length of stay. And one of key points of this study, I believe, is the difficulty to compare results across previous studies because of various outcome definitions, and necessity of the valid measure of gastric tube tolerance in future studies. Authors should add more concise description in this paragraph (L273-283) to show the potential benefit on gastric feeding tube tolerance and clarify the abovementioned point.

**Answer:** Thank you for your thoughtful reminder. These comments are valuable and very helpful for revising and improving our paper and provided important guiding significance for our research. According to your advice, we have amended this part in the revised manuscript as follows:

“Thirteen studies evaluated the effect of prokinetics on gastrointestinal symptoms and/or feeding tolerance in adult critically ill patients receiving gastric feeding [26-30, 32-34, 36-40]. The main results obtained are as follows: gastric emptying,

GRV, diarrhea, constipation, feeding complications and feeding intolerance. Gastric emptying was measured by the drug model of acetaminophen absorption or the <sup>13</sup>C-octanoic acid breath test with calculation of the gastric emptying time, gastric emptying coefficient or area under the plasma concentration-time curve. The various outcome definitions, especially for gastric tube tolerance, precluded quantitative synthesis of the data.

As a class of drugs, prokinetic agents appear to have positive effects on gastrointestinal function and improving feeding tolerance. Ten of the thirteen studies reported positive effects on improving gastric emptying and/or resolution of feeding intolerance in critically ill patients with the use of prokinetic agents. However, two studies suggested that metoclopramide had no effect on decreasing gastrointestinal complications in adult neurocritical patients or critical traumatic brain injury patients. One study reported that rikkunshito did not improve the achievement of enteral calorie targets in critically ill adults (Table 2).”

2. L288-290: "Those five studies, enrolling a total of 250 patients, demonstrated that there was no significant difference in hospital length of stay ..."

Are there any significant difference between groups about the hospital length of stay? 95%CI of -5.35 to -1.06 is significant, isn't it? Please check.

**Answer:** I apologize for this mistake. We have corrected this error. In the revised manuscript, the text is as follows: “These five studies, which enrolled a total of 250 patients, demonstrated a significant difference in the hospital length of stay between the prokinetic agent-treated group and the control group (MD -3.21, 95% CI -5.35, -1.06; P = 0.003; I2 = 28%) (Fig 2)”.

Thank you again for your attention and thoughtful advice. We hope that the revised manuscript will meet with your approval.
